# Supplementary material
Source: PubMed Central journal article supplement (PMC2783322)
Supplement: NIHMS154162-supplement-1_si_001.pdf [file NIHMS154162-supplement-1_si_001.pdf]

# The Significance of Degenerate Processes to Enantioselective Olefin Metathesis Reactions Promoted by Stereogenic-at-Mo Complexes

Simon J. Meek,<sup>†</sup> Steven J. Malcolmson,<sup>†</sup> Bo Li,<sup>†</sup> Richard R. Schrock,<sup>‡</sup> and Amir H. Hoveyda,<sup>†,\*</sup>

<sup>†</sup>*Department of Chemistry, Merkert Chemistry Center, Boston College  
Chestnut Hill, Massachusetts 02467*

<sup>‡</sup>*Department of Chemistry, Massachusetts Institute of Technology  
Cambridge, Massachusetts 02139*

## SUPPORTING INFORMATION

|          |                                                                                                                                               |
|----------|-----------------------------------------------------------------------------------------------------------------------------------------------|
| Page S1  | General Information                                                                                                                           |
| Page S3  | Reagents                                                                                                                                      |
| Page S4  | Synthesis of <i>R</i> - <b>1</b>                                                                                                              |
| Page S5  | Catalytic Enantioselective Olefin Metathesis of <b>5</b> with Diastereomerically Pure Mo Complexes <i>S</i> - <b>1</b> or <i>R</i> - <b>1</b> |
| Page S9  | Pre-establishing Curtin-Hammett Conditions in a Catalytic Enantioselective RCM (eq 5 in the main text)                                        |
| Page S9  | Mo-Catalyzed enantioselective RCM (eq 1 in the main text)                                                                                     |
| Page S10 | Additional Examples of Enantioselective RCM with <i>S</i> - <b>1</b> and <i>R</i> - <b>1</b>                                                  |
| Page S13 | Synthesis of Tetraene <b>12</b>                                                                                                               |
| Page S14 | Enantioselective RCM of Tetraene <b>12</b> (eq 2 in the main text)                                                                            |
| Page S15 | Enantioselective RCM of Tetraene <b>12</b> at 2% Conversion (eq 6 in the main text)                                                           |
| Page S17 | Synthesis of Allylamine <b>15</b> and <i>d</i> <sub>3</sub> - <b>15</b>                                                                       |
| Page S18 | Crossover Experiment (eq 3 in the main text)                                                                                                  |
| Page S19 | Crossover Experiment in the Presence of Ethylene                                                                                              |
| Page S20 | Synthesis of Triene <i>d</i> <sub>3</sub> - <b>5</b>                                                                                          |
| Page S22 | Enantioselective RCM Crossover Experiment (eq 4 in the main text)                                                                             |
| Page S24 | Addendum to Reference <b>10</b>                                                                                                               |
| Page S25 | <sup>1</sup> H NMR and <sup>13</sup> C NMR Spectra of New Compounds                                                                           |
| Page S35 | Crystal data and structure refinement for <i>R</i> - <b>1</b>                                                                                 |

**General:** All reactions were carried out in oven- (135 °C) or flame-dried glassware under an inert atmosphere of dry N<sub>2</sub> unless otherwise stated. Alcohol **4** and substrates **5**, *d*<sub>3</sub>-**5**, **7**, **12**, **15**, *d*<sub>3</sub>-**15**, and **26** were dried by azeotropic distillation with C<sub>6</sub>H<sub>6</sub> prior to use in reactions with Mo-based reagents. (The numbering of compounds refers to those in the main body of the text; other

compounds, mentioned here, are abbreviated by letters.) Substrates **5**<sup>1</sup>, **7**<sup>2</sup>, **A**<sup>3</sup>, **C**<sup>3</sup>, **E**<sup>4</sup>, **G**<sup>5</sup>, and **I**<sup>1</sup> were synthesized according to previously reported procedures. Infrared (IR) spectra were recorded on a Bruker FTIR Alpha (ATR Mode) spectrometer,  $\nu_{\max}$  in  $\text{cm}^{-1}$ . Bands are characterized as strong (s), medium (m), or weak (w). <sup>1</sup>H NMR spectra were recorded on a Varian Unity INOVA 400 (400 MHz) spectrometer. Chemical shifts are reported in ppm from tetramethylsilane with the solvent resonance resulting from incomplete deuteration as the internal reference ( $\text{CDCl}_3$ :  $\delta$  7.26,  $\text{C}_6\text{D}_6$ :  $\delta$  7.16). <sup>1</sup>H NMR data are reported as follows: chemical shift, integration, multiplicity (s = singlet, d = doublet, t = triplet, br = broad, m = multiplet), and coupling constants (Hz). <sup>2</sup>H NMR spectra were recorded on a Varian INOVA 500 (76.7 MHz) spectrometer. Chemical shifts are reported in ppm from tetramethylsilane with the natural abundance of deuterium in the solvent as the internal reference ( $\text{CDCl}_3$  in  $\text{CHCl}_3$ :  $\delta$  7.26). <sup>13</sup>C-NMR spectra were recorded on a Varian Unity INOVA 400 (100 MHz) spectrometer with complete proton decoupling. Chemical shifts are reported in ppm from tetramethylsilane with the solvent as the internal reference ( $\text{CDCl}_3$ :  $\delta$  77.16,  $\text{C}_6\text{D}_6$ :  $\delta$  128.06). In the case of coupling to deuterium, the data are reported as follows: chemical shift, multiplicity (d = doublet, t = triplet), coupling constants (C–D, Hz). Enantiomer ratios were determined by HPLC (Chiral Technologies Chiralpak OD column (4.6 mm x 250 mm)) or by GLC analysis (Alltech Associates Chiraldex GTA (CDGTA, 30 m x 0.25 mm)) in comparison with authentic racemic materials. High-resolution mass spectrometry was performed on a Micromass LCT ESI-MS (positive mode) at the Boston College Mass Spectrometry Facility. Elemental analysis was performed at Midwest Microlab, LLC (Indianapolis, IN). Optical rotation values were recorded on a Rudolph Research Analytical Autopol IV polarimeter. Melting points were measured on a Thomas Hoover capillary melting point apparatus and are uncorrected. X-ray crystallography was performed at the Boston College X-ray Crystallographic Laboratory.

**Solvents:** Solvents were purged with argon and purified under a positive pressure of dry argon by a modified Innovative Technologies purification system: diethyl ether (Aldrich) was passed through activated alumina columns; benzene (Aldrich) and pentane<sup>6</sup> (J T. Baker) were passed successively through activated Cu and alumina columns. Tetrahydrofuran (Aldrich) was distilled from sodium benzophenone ketyl.

- 
- (1) Dolman, S. J.; Sattely, E. S.; Hoveyda, A. H.; Schrock, R. R. *J. Am. Chem. Soc.* **2002**, *124*, 6991–6997.
  - (2) Sattely, E. S.; Meek, S. J.; Malcolmson, S. J.; Schrock, R. R.; Hoveyda, A. H. *J. Am. Chem. Soc.* **2009**, *131*, 943–953.
  - (3) Sattely, E. S.; Cortez, G. A.; Moebius, D. C.; Schrock, R. R.; Hoveyda, A. H. *J. Am. Chem. Soc.* **2005**, *127*, 8526–8533.
  - (4) Kiely, A. F.; Jernelius, J. A.; Schrock, R. R.; Hoveyda, A. H. *J. Am. Chem. Soc.* **2002**, *124*, 2868–2869.
  - (5) Hansen, E. C.; Lee, D. *Org. Lett.* **2004**, *6*, 2035–2038.
  - (6) *n*-Pentane was allowed to stir over concentrated  $\text{H}_2\text{SO}_4$  for three days, washed with water, followed by a saturated aqueous solution of  $\text{NaHCO}_3$ , dried over  $\text{MgSO}_4$ , and filtered before use in the solvent purification system.

**Metal-based Complexes:** Mo-based bis-pyrrolide **3** was prepared according to published procedures.<sup>7</sup> Mo-based monoaryloxy-monopyrrolide **S-1** was prepared based on published procedures.<sup>8</sup> Mo complexes were handled in an N<sub>2</sub>-filled dry box.

**REAGENTS:**

**d<sub>4</sub>-Acetic acid** (99.93%) was purchased from Cambridge Isotope Laboratories and used as received.

**Allyl bromide** was purchased from Aldrich and distilled from CaH<sub>2</sub> prior to use.

**Allyl ether** was purchased from Aldrich and distilled from CaH<sub>2</sub> into activated 4 Å molecular sieves prior to use.

**d<sub>6</sub>-Benzene** was purchased from Cambridge Isotope Laboratories and distilled from Na into activated 4 Å molecular sieves prior to use.

**Benzyl potassium** was prepared according to the literature procedure.<sup>9</sup>

**n-Butyl lithium** (15% in hexanes) was purchased from Strem and titrated with *s*-butanol (1,10-phenanthroline as indicator) prior to use.

**Deuterium gas** (99.9%) was purchased from Cambridge Isotope Laboratories and used as received.

**N,N-Dimethylformamide** was purchased from Acros (extra dry with molecular sieves) and used as received.

**Lindlar's catalyst** (5% w/w Pd on CaCO<sub>3</sub>, poisoned with Pb) was purchased from Aldrich and used as received.

**Phosphorus tribromide** was purchased from Aldrich and used as received.

**Potassium carbonate** was purchased from Fisher and used as received.

**Potassium fluoride** was purchased from Aldrich and used as received.

**Propargyl bromide** (80% w/w solution in toluene) was purchased from Aldrich and used as received.

**Quinoline** was purchased from Aldrich and distilled from Na<sub>2</sub>SO<sub>4</sub> prior to use.

---

(7) Singh, R.; Czekelius, C.; Schrock, R. R.; Müller, P. M.; Hoveyda, A. H. *Organometallics* **2007**, *26*, 2528–2539.

(8) Malcolmson, S. J.; Meek, S. J.; Sattely, E. S.; Schrock, R. R.; Hoveyda, A. H. *Nature* **2008**, *456*, 933–937.

(9) Schlosser, H.; Hartmann, J. *Angew. Chem., Int. Ed. Engl.* **1973**, *12*, 508–509.

### Synthesis of Diastereomerically Pure Complex *R*-1:

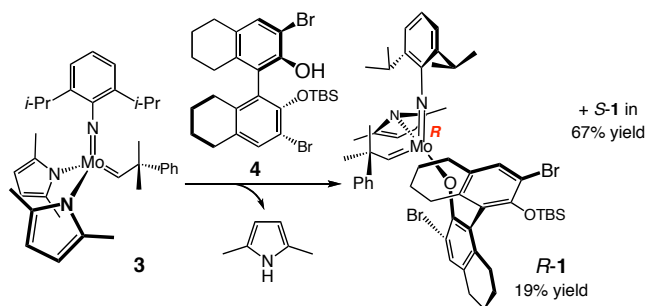

In an N<sub>2</sub>-filled dry box, a 25-mL pear-shaped flask with magnetic stir bar was charged with Mo bis(pyrrolide) complex **3** (224 mg, 379 μmol, 1.00 equiv) and Et<sub>2</sub>O (5 mL). The flask was sealed and allowed to cool to -50 °C (glovebox freezer). An 8-mL vial was charged with alcohol **4** (211 mg, 379 μmol, 1.00 equiv) and Et<sub>2</sub>O (1 mL). The vial was tightly capped and allowed to cool to -50 °C (glovebox freezer). The bis(pyrrolide) solution was allowed to stir and the chilled alcohol solution was added to it by pipet; the vial containing the alcohol was rinsed with Et<sub>2</sub>O (0.3 mL, -50 °C), which was similarly transferred to the mixture. The resulting solution was allowed to warm to 22 °C. As the reaction progressed, the mixture turned from bright yellow to red. After 1 h at 22 °C, volatiles were removed under reduced pressure and the resulting residue (red solid) was dissolved in *n*-pentane (5 mL), which was subsequently removed *in vacuo* to afford a red-orange powder (alternatively, this procedure can be repeated until a powder is obtained). The powder was dissolved in *n*-pentane (2 mL) with vigorous stirring; once all solid had dissolved entirely, the flask was sealed and allowed to cool to -50 °C (glovebox freezer) for 48 h, after which large red crystals appeared. The crystals were collected by vacuum filtration and washed with cold *n*-pentane (~5 mL, -50 °C) to afford diastereomerically pure *S*-1 (contains one molecule of *n*-pentane per 1 molecule of *S*-1) (289 mg, 255 μmol, 67.0% yield). The resulting mother liquor (enriched in the *R* diastereomer; 4:1 *R*-1:*S*-1) was concentrated *in vacuo* to afford a red-orange powder. The powder was dissolved in *n*-pentane (0.5 mL) with vigorous stirring; once the solid had completely dissolved, the flask was sealed and allowed to cool to -50 °C (glovebox freezer) for 48 h, after which small red crystals appeared. The crystals were collected by vacuum filtration and washed with cold *n*-pentane (~2 mL, -50 °C) to afford diastereomerically pure *R*-1 (contains 1 molecule of *n*-pentane per one molecule of *R*-1) (84.0 mg, 74.0 μmol, 19.5% yield). The physical and spectral data were identical to those previously reported for chiral complex *S*-1.

*R*-1·*n*-pentane: <sup>1</sup>H NMR (400 MHz, C<sub>6</sub>D<sub>6</sub>): δ 12.90 (1H, s), 7.37-7.33 (3H, m), 7.18-7.12 (3H, m), 7.05-6.98 (4H, m), 5.99 (2H, br s), 3.67 (2H, apparent br s), 2.60-1.75 (15H, m), 1.86 (3H, s), 1.62 (3H, s), 1.57-0.79 (19H, m), 1.21 (3H, s), 1.19 (3H, s), 0.95 (9H, s), 0.88 (6H, t, *J* = 6.8 Hz), 0.25 (3H, s), 0.03 (3H, s); <sup>13</sup>C NMR (100 MHz, C<sub>6</sub>D<sub>6</sub>): δ 295.1, 158.0, 153.5, 148.5, 148.2, 136.8, 136.6, 134.1, 132.6, 132.1, 131.7, 130.9, 129.2, 128.8, 128.5, 126.5, 126.2, 123.5 br, 112.7, 112.0, 109.3 br, 55.8, 34.5, 33.0, 30.4, 29.6, 28.9 br, 27.9, 27.6, 26.5, 24.2 br, 23.3, 23.2,

23.0, 22.9, 22.7, 18.9, 17.5 br, 14.3, -2.2, -3.0; Anal. calcd for  $C_{59}H_{82}Br_2MoN_2O_2Si$ : C, 62.43; H, 7.28; N, 2.47; found: C, 62.47; H, 7.24; N, 2.42.

**General Procedure for Catalytic Enantioselective Olefin Metathesis with Diastereomerically Pure Mo Complexes *S*-1 or *R*-1:** In an  $N_2$ -filled dry box, a 4-mL vial equipped with a magnetic stir bar was charged with substrate. A separate 2-mL vial was charged with isolated Mo complex *S*-1 or *R*-1 and then  $C_6H_6$ . The solution of catalyst was transferred to substrate by syringe and the resulting mixture allowed to stir for the required period of time. The vessel was removed from the dry box and the reaction quenched by the addition of benchtop  $Et_2O$  (~1 mL). The mixture was concentrated *in vacuo* (% conversion determined by 400 MHz  $^1H$  NMR analysis). Purification was performed by silica gel chromatography.<sup>8</sup> Enantiomeric purity of the product of the olefin metathesis reaction was determined by GLC or HPLC analysis in comparison with authentic racemic material.

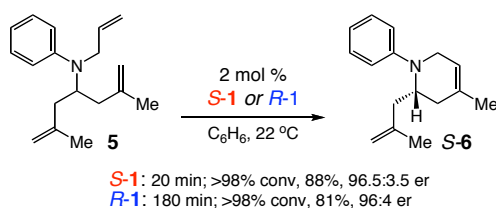

**(*S*)-4-Methyl-2-(2-methylallyl)-1-phenyl-1,2,3,6-tetrahydropyridine<sup>1,8</sup> (**6**).** The physical and spectral data were identical to those previously reported for this heterocycle. m.p. = 55–57 °C;  $^1H$  NMR (400 MHz,  $CDCl_3$ ):  $\delta$  7.91–7.87 (2H, m), 7.28–7.23 (2H, m), 6.79–6.74 (1H, m), 5.54–5.50 (1H, m), 4.79–4.75 (1H, m), 4.69–4.66 (1H, m), 4.23 (1H, dddd,  $J_{ABX} = 10.0, 5.2, 4.0, 0.8$  Hz), 3.80 (1H, app dt,  $J_{ABX} = 16.8, 1.6$  Hz), 3.51 (1H, dddd,  $J_{ABX} = 16.8, 3.6, 2.4, 2.0, 2.0$  Hz), 2.40 (1H, br d,  $J_{AB} = 16.8$  Hz), 2.21 (1H, dd,  $J_{AB} = 13.2, 10.6$  Hz), 2.07 (1H, dd,  $J_{ABX} = 13.6, 4.0$  Hz), 2.03 (1H, d,  $J_{AB} = 17.2$  Hz), 1.76 (3H, br s), 1.74 (3H, d,  $J = 0.8$  Hz);  $[\alpha]_D^{20} -169$  (c 0.500,  $CHCl_3$ ) for a sample of 96.5:3.5 er [Lit.<sup>1,8</sup>  $[\alpha]_D^{20} +181$  (c 0.950,  $CHCl_3$ ) for a sample of 99:1 er]. The enantiomeric purity of **6** (96.5:3.5 er) was determined by GLC analysis (CDGTA column, 20 psi, 130 °C) in comparison with authentic racemic material. The enantiomer formed in this reaction was assigned through inference with that detailed previously.<sup>1</sup>

**Table 1.** Time Dependence of Conversion and Selectivity in Catalytic RCM with Pure *R*-1

| entry          | time (min) | conv (%) <sup>a</sup> | er ( <i>S</i> : <i>R</i> ) <sup>b</sup> |
|----------------|------------|-----------------------|-----------------------------------------|
| 1 <sup>c</sup> | 30         | 5                     | 85.5:14.5                               |
| 2              | 45         | 15                    | 94:6                                    |
| 3              | 60         | 23                    | 95:5                                    |
| 4              | 180        | >98                   | 96:4                                    |

<sup>a</sup> Based on 400 MHz  $^1H$  NMR analysis of unpurified mixtures. <sup>b</sup> Based on GLC analysis (see below). <sup>c</sup> Variation in er with respect to conversion was observed due to limits in  $^1H$  NMR detection, therefore the values reported are an average of two experiments.

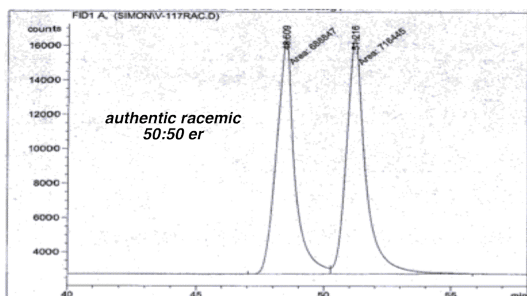

| Peak # | RetTime [min] | Type | Width [min] | Area counts*s | Height [counts] | Area %   |
|--------|---------------|------|-------------|---------------|-----------------|----------|
| 1      | 48.509        | MF   | 0.8323      | 6.88847e5     | 1.37947e4       | 49.01806 |
| 2      | 51.216        | FM   | 0.8685      | 7.16445e5     | 1.37492e4       | 50.98194 |

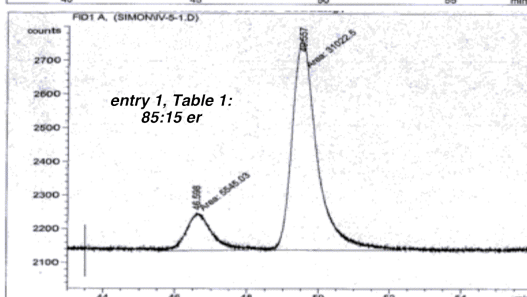

| Peak # | RetTime [min] | Type | Width [min] | Area counts*s | Height [counts] | Area %   |
|--------|---------------|------|-------------|---------------|-----------------|----------|
| 1      | 46.598        | MM   | 0.8084      | 5545.03369    | 114.32389       | 15.16380 |
| 2      | 49.557        | MM   | 0.8211      | 3.10225e4     | 629.65698       | 84.83620 |

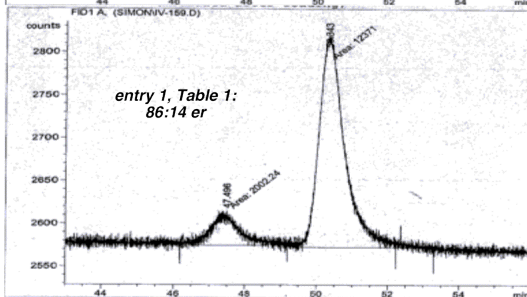

| Peak # | RetTime [min] | Type | Width [min] | Area counts*s | Height [counts] | Area %   |
|--------|---------------|------|-------------|---------------|-----------------|----------|
| 1      | 47.496        | MM   | 0.8137      | 2002.23706    | 41.01082        | 13.93033 |
| 2      | 50.343        | MM   | 0.8261      | 1.23710e4     | 249.58965       | 86.06967 |

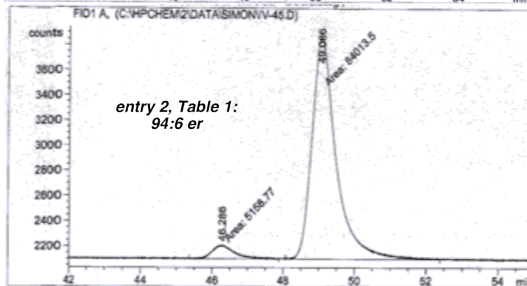

| Peak # | RetTime [min] | Type | Width [min] | Area counts*s | Height [counts] | Area %   |
|--------|---------------|------|-------------|---------------|-----------------|----------|
| 1      | 46.286        | MM   | 0.7486      | 5158.76660    | 114.84943       | 5.78517  |
| 2      | 49.086        | MM   | 0.7934      | 8.40135e4     | 1764.81702      | 94.21483 |

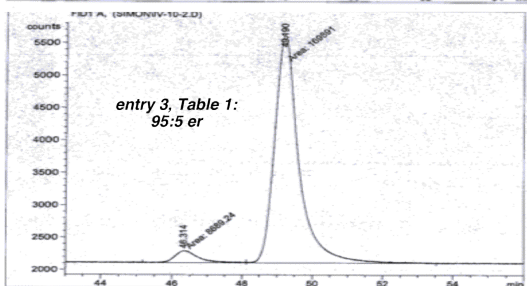

| Peak # | RetTime [min] | Type | Width [min] | Area counts*s | Height [counts] | Area %   |
|--------|---------------|------|-------------|---------------|-----------------|----------|
| 1      | 46.314        | MM   | 0.7636      | 8689.24023    | 189.65724       | 4.86572  |
| 2      | 49.190        | MM   | 0.8030      | 1.69891e5     | 3526.10547      | 95.13428 |

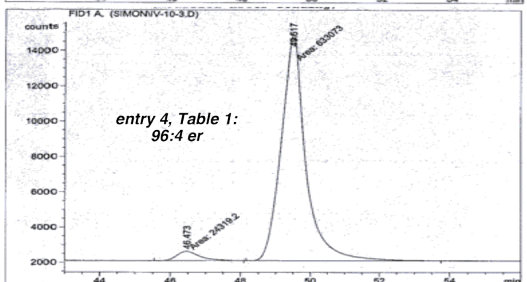

| Peak # | RetTime [min] | Type | Width [min] | Area counts*s | Height [counts] | Area %   |
|--------|---------------|------|-------------|---------------|-----------------|----------|
| 1      | 46.473        | MM   | 0.7443      | 2.43192e4     | 544.58014       | 3.69934  |
| 2      | 49.517        | MM   | 0.8220      | 6.33073e5     | 1.28364e4       | 96.30066 |

**Table 2.** Time Dependence of Conversion and Selectivity in Catalytic RCM with Pure S-1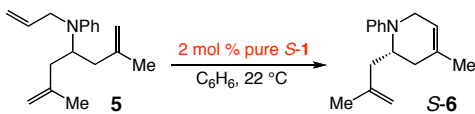

| entry          | time (min) | conv (%) <sup>a</sup> | er (S: <i>R</i> ) <sup>b</sup> |
|----------------|------------|-----------------------|--------------------------------|
| 1 <sup>c</sup> | 2          | 4                     | 76:24                          |
| 2 <sup>c</sup> | 2.5        | 7                     | 87.5:12.5                      |
| 3              | 3          | 13                    | 93.5:6.5                       |
| 4              | 20         | >98                   | 96.5:3.5                       |

<sup>a</sup> Based on 400 MHz <sup>1</sup>H NMR analysis of unpurified mixtures. <sup>b</sup> Based on HPLC analysis (see below). <sup>c</sup> Variation in er with respect to conversion was observed due to limits in <sup>1</sup>H NMR detection, therefore the values reported are an average of two experiments.

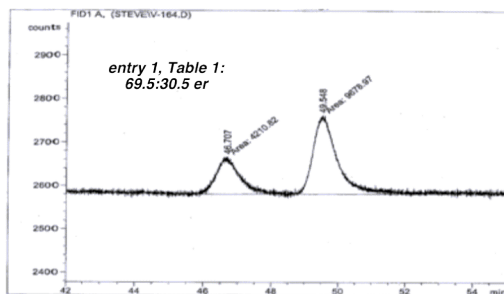

| Peak # | RetTime [min] | Type | Width [min] | Area counts*s | Height [counts] | Area %   |
|--------|---------------|------|-------------|---------------|-----------------|----------|
| 1      | 46.707        | MF   | 0.7998      | 4210.81689    | 87.74249        | 30.31592 |
| 2      | 49.548        | FM   | 0.8817      | 9678.97070    | 182.95580       | 69.68408 |

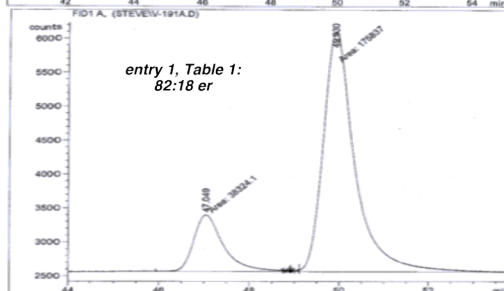

| Peak # | RetTime [min] | Type | Width [min] | Area counts*s | Height [counts] | Area %   |
|--------|---------------|------|-------------|---------------|-----------------|----------|
| 1      | 47.049        | MF   | 0.7611      | 3.83241e4     | 839.17712       | 17.89496 |
| 2      | 49.930        | FM   | 0.8265      | 1.75837e5     | 3545.62036      | 82.10504 |

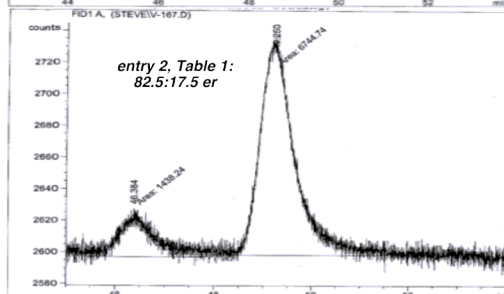

| Peak # | RetTime [min] | Type | Width [min] | Area counts*s | Height [counts] | Area %   |
|--------|---------------|------|-------------|---------------|-----------------|----------|
| 1      | 46.384        | MF   | 0.7509      | 1438.23535    | 31.92254        | 17.57594 |
| 2      | 49.250        | FM   | 0.8056      | 6744.74316    | 139.54701       | 82.42406 |

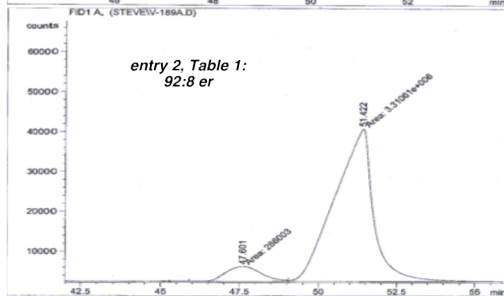

| Peak # | RetTime [min] | Type | Width [min] | Area counts*s | Height [counts] | Area %   |
|--------|---------------|------|-------------|---------------|-----------------|----------|
| 1      | 47.601        | MF   | 1.2839      | 2.86003e5     | 3712.75293      | 7.95200  |
| 2      | 51.422        | FM   | 1.4374      | 3.31061e6     | 3.83856e4       | 92.04800 |

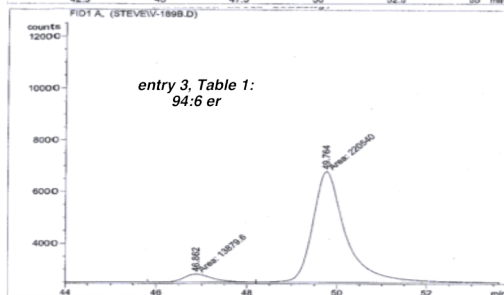

| Peak # | RetTime [min] | Type | Width [min] | Area counts*s | Height [counts] | Area %   |
|--------|---------------|------|-------------|---------------|-----------------|----------|
| 1      | 46.862        | MF   | 0.7244      | 1.38796e4     | 319.34003       | 5.92084  |
| 2      | 49.764        | FM   | 0.8550      | 2.20540e5     | 4298.84619      | 94.07916 |

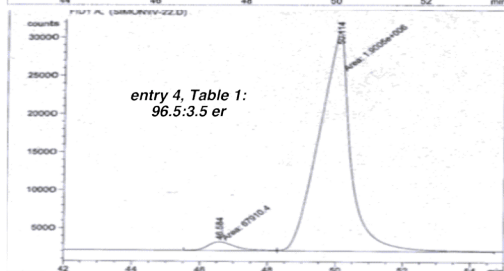

| Peak # | RetTime [min] | Type | Width [min] | Area counts*s | Height [counts] | Area %   |
|--------|---------------|------|-------------|---------------|-----------------|----------|
| 1      | 46.584        | MF   | 0.9710      | 6.79104e4     | 1165.68884      | 3.45001  |
| 2      | 50.114        | FM   | 1.1004      | 1.90050e6     | 2.87851e4       | 96.54999 |



**Pre-established Curtin-Hammett Conditions in a Catalytic Enantioselective RCM (eq 5):**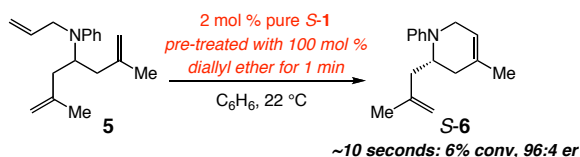

In an N<sub>2</sub>-filled dry box, a 4-mL vial equipped with a magnetic stir bar was charged with substrate **5** (10.0 mg, 0.0392 mmol, 1.00 equiv). A separate 2-mL vial was charged with isolated Mo complex *S-1* (0.90 mg, 0.783 μmol, 0.0200 equiv), C<sub>6</sub>H<sub>6</sub> (392 μL) and then diallyl ether (3.8 μL, 0.0392 mmol, 1.00 equiv). The resulting solution was allowed to stand for one minute; the solution changed color from light orange to dark orange. The solution of catalyst was transferred to substrate by syringe and the resulting mixture was allowed to stir for 10 seconds. At that time, the reaction was quenched by the addition of benchtop Et<sub>2</sub>O (~1 mL) and concentrated *in vacuo*. The unpurified brown solid was dissolved in minimal MeOH (0.5 mL), and KF (4.80 mg, 0.083 mmol, 106 equiv with respect to *S-1*) was added (to desilylate phenol **4**, which has the same R<sub>f</sub> as **6**). The mixture was allowed to stir for 30 min. Silica gel was added and the mixture concentrated and purified by silica gel chromatography (50:1 pet ether:Et<sub>2</sub>O) to afford *S-6* as a white solid.

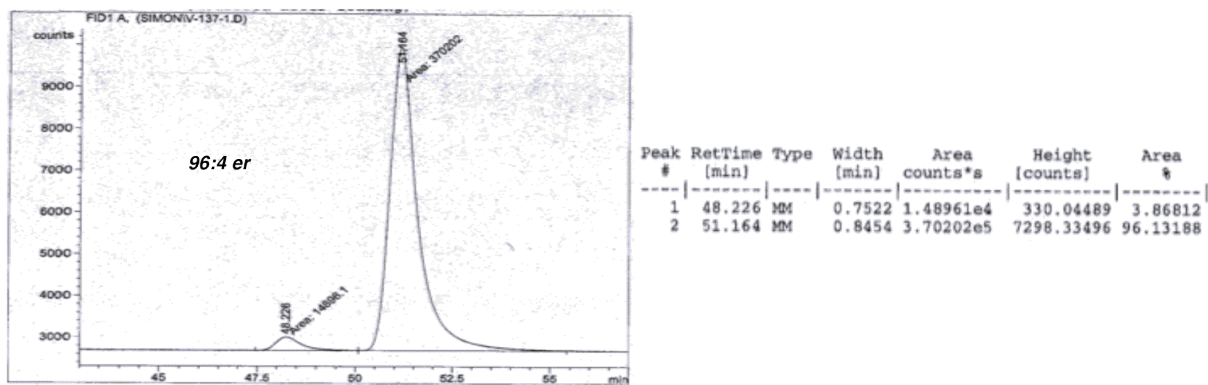**Mo-Catalyzed enantioselective RCM in eq 1:**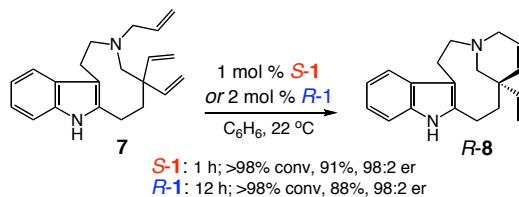

**Tetradehydro (+)-quebrachamine (8).** The physical and spectral data were identical to those previously reported for compound **8**. <sup>1</sup>H NMR (400 MHz, CDCl<sub>3</sub>): δ 7.78 (1H, br s), 7.51–7.47 (1H, m), 7.31–7.28 (1H, m), 7.13–7.05 (2H, m), 5.90 (1H, ddd, *J* = 9.9, 4.8, 1.5 Hz), 5.61 (1H, dd, *J*<sub>ABX</sub> = 17.5, 10.5 Hz), 5.44 (1H, ddd, *J* = 9.9, 4.0, 2.0 Hz), 4.92 (1H, dd, *J* = 6.8, 1.3 Hz), 4.88 (1H, s), 3.73 (1H, ddd, *J*<sub>ABX</sub> = 14.2, 10.5, 1.5 Hz), 3.32–3.25 (1H, m), 3.13–3.07 (1H, m), 2.88–2.82 (1H, m), 2.80–2.64 (4H, m), 2.42–2.33 (2H, m), 2.01–1.86 (2H, m). [α]<sub>D</sub><sup>20</sup> +99.2 (c 0.513,

CHCl<sub>3</sub>) for a sample of 98:2 er. The enantiomeric purity of **8** (98:2 er) was determined by HPLC analysis (Chiralpak OD, 95:5 hexanes:*i*-PrOH, 1.0 mL/min, 254 nm) in comparison with authentic racemic material.

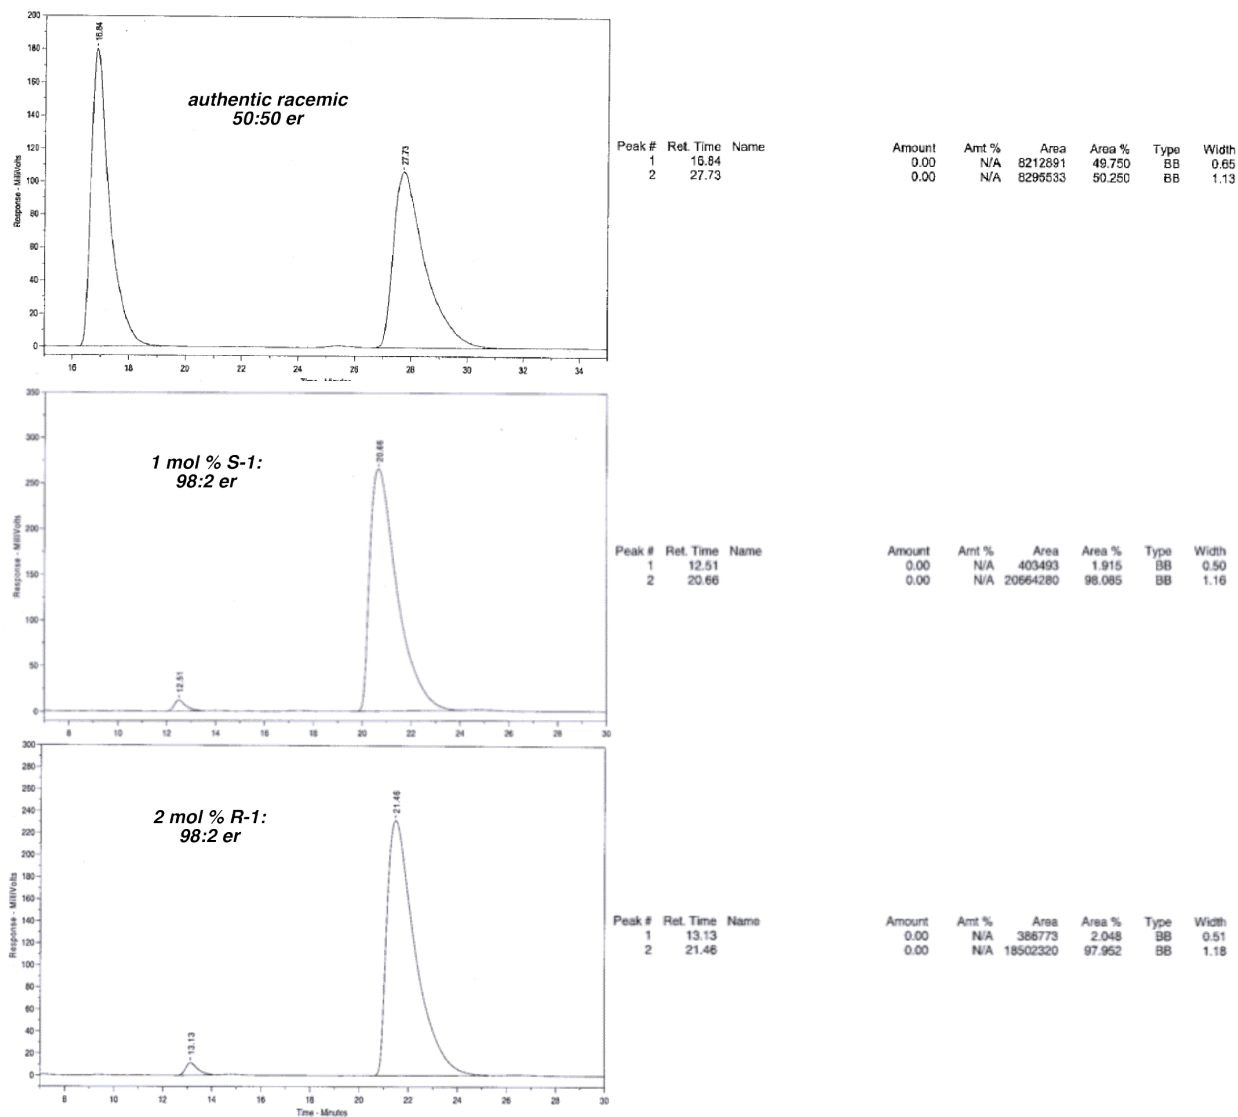

### ■ Additional Examples of Enantioselective RCM with S-1 and R-1:

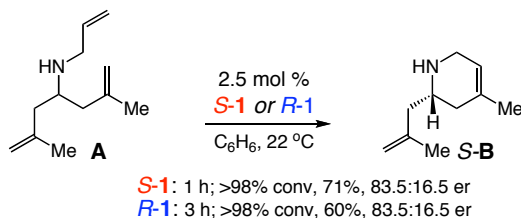

(*S*)-4-Methyl-2-(2-methylallyl)-1,2,3,6-tetrahydropyridine (**B**). The physical and spectral data were identical to those previously reported for this heterocycle. <sup>1</sup>H NMR (400 MHz, CDCl<sub>3</sub>): δ 5.43–5.38 (1H, m), 4.83–4.81 (1H, m), 4.78–4.76 (1H, m), 3.40–3.28 (2H, m), 2.84 (1H, dddd,

$J_{AX} = 9.6, 7.6, 6.0, 4.4$  Hz), 2.16-2.11 (2H, m), 1.90–1.62 (3H, m), 1.73 (3H, s), 1.67 (3H, s).  $[\alpha]_D^{20} +71.6$  ( $c$  0.993,  $\text{CHCl}_3$ ) for a sample of 83.5:16.5 er [Lit.<sup>3,8</sup>  $[\alpha]_D^{20} +77.0$  ( $c$  1.00,  $\text{CHCl}_3$ ) for a sample of 93.5:6.5 er]. The enantiomeric purity of **B** (83.5:16.5 er) was determined by acylation to the corresponding amide as previously reported<sup>3</sup> and GLC analysis (CDGTA column, 15 psi, 120 °C) in comparison with authentic racemic material.

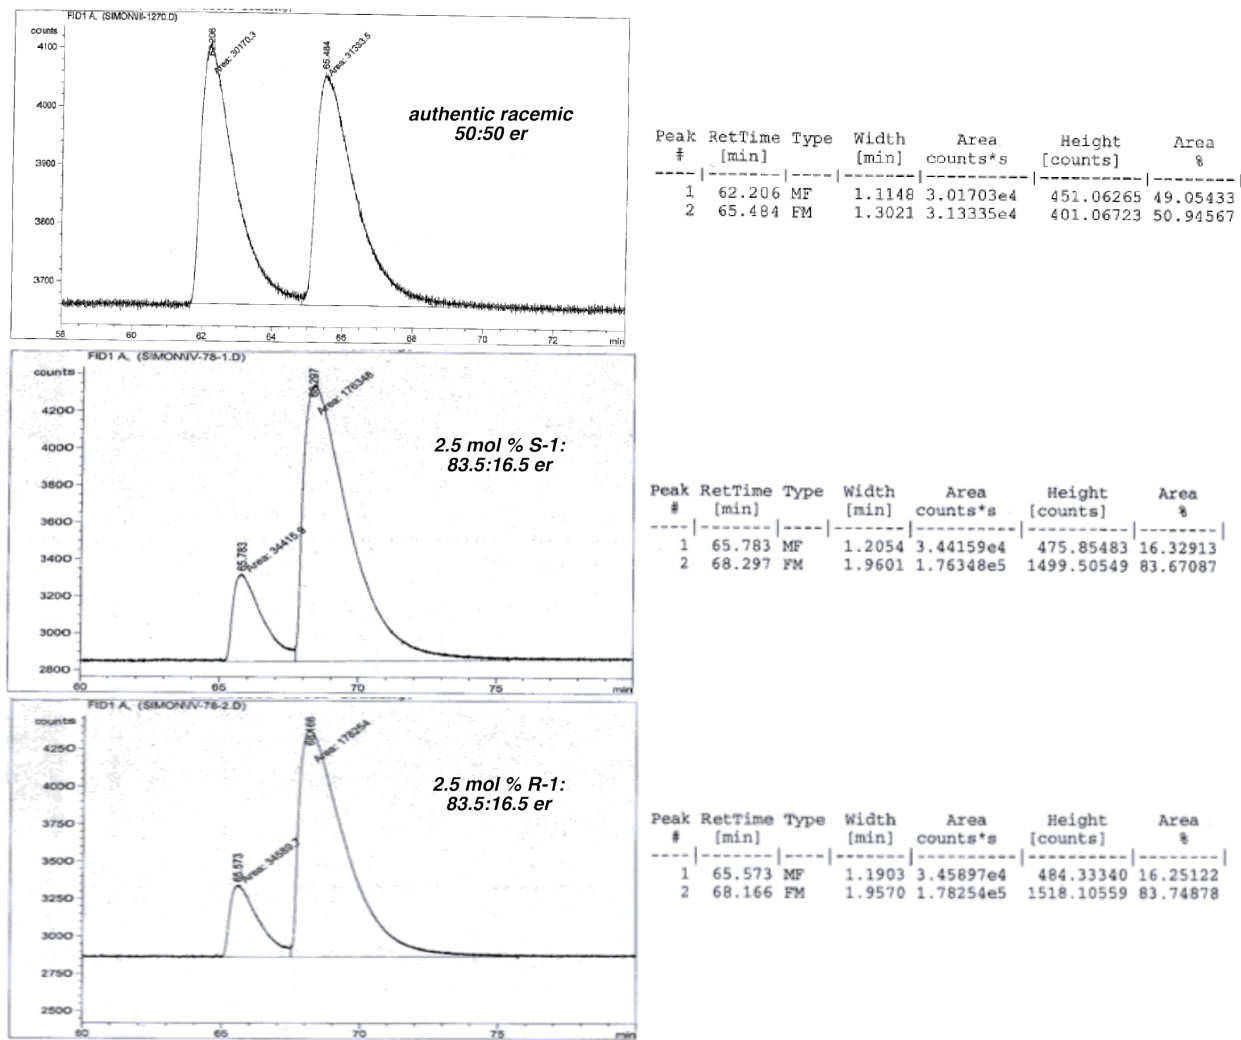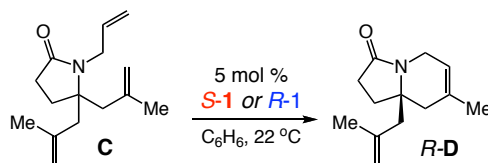

**S-1**: 1 h; >98% conv, 97%, 95:5 er  
**R-1**: 3 h; >98% conv, >98%, 95.5:4.5 er

**(R)-7-methyl-8a-(2-methylallyl)-1,2,8,8a-tetrahydroindolizin-3(5H)-one (D)**. The physical and spectral data were identical to those previously reported for this bicyclic amide. <sup>1</sup>H NMR (400 MHz,  $\text{CDCl}_3$ ):  $\delta$  5.41–5.37 (1H, m), 4.90 (1H, dddd,  $J_{ABX} = 2.0, 1.5, 1.5, 1.5$  Hz), 4.73–4.71 (1H, m), 4.32 (1H, br d,  $J_{AB} = 18.4$  Hz), 3.43 (1H, d,  $J_{AB} = 18.4$  Hz), 2.49–2.22 (5H, m), 2.14–2.03 (2H, m), 1.83–1.74 (1H, m), 1.75 (3H, s), 1.70 (3H, s).  $[\alpha]_D^{20} -109$  ( $c$  0.513,  $\text{CHCl}_3$ ) for a sample

of 95.5:4.5 er [Lit.<sup>3</sup>  $[\alpha]_D^{20} +103$  ( $c$  1.00,  $\text{CHCl}_3$ ) for a sample of >99:1 er]. The enantiomeric purity of **D** (95.5:4.5 er) was determined by GLC analysis (CDGTA column, 20 psi, 140 °C) in comparison with authentic racemic material.

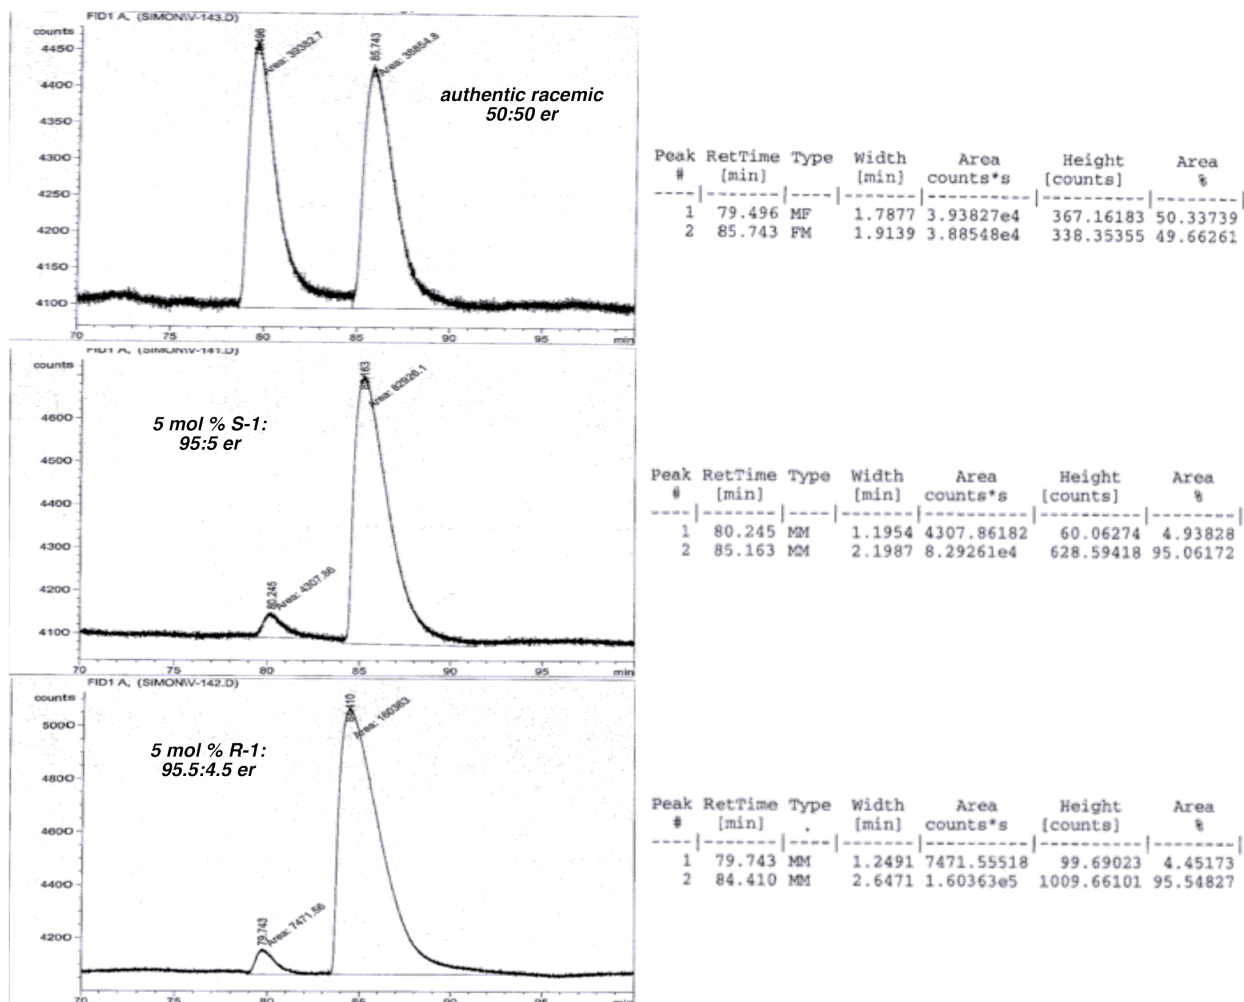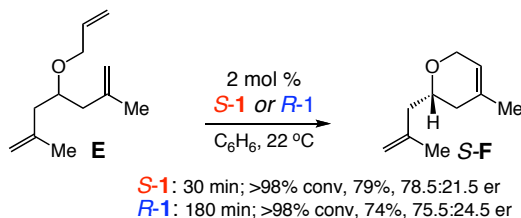

**(S)-4-methyl-2-(2-methylallyl)-3,6-dihydro-2H-pyran (F).** The physical and spectral data were identical to those previously reported for this unsaturated pyran.  $^1\text{H}$  NMR (400 MHz,  $\text{CDCl}_3$ ):  $\delta$  5.42–5.39 (1H, br s), 4.83–4.81 (1H, m), 4.79–4.76 (1H, m), 4.22–4.08 (2H, m), 3.67 (1H, dddd,  $J = 9.6, 7.5, 5.7, 3.6$  Hz), 2.35 (1H, dd,  $J = 14.4, 7.6$  Hz), 2.18 (1H, dd,  $J = 14.4, 6.0$  Hz), 2.00–1.90 (1H, m), 1.87–1.79 (1H, m), 1.77 (3H, s), 1.69 (3H, s).  $[\alpha]_D^{20} = -25.95$  ( $c = 2.05$ ,  $\text{CHCl}_3$ ) for a sample of 78.5:21.5 er. The enantiomeric purity of **F** (78.5:21.5 er) was determined by GLC analysis (CDGTA column, 15 psi, 60 °C) in comparison with authentic racemic material.

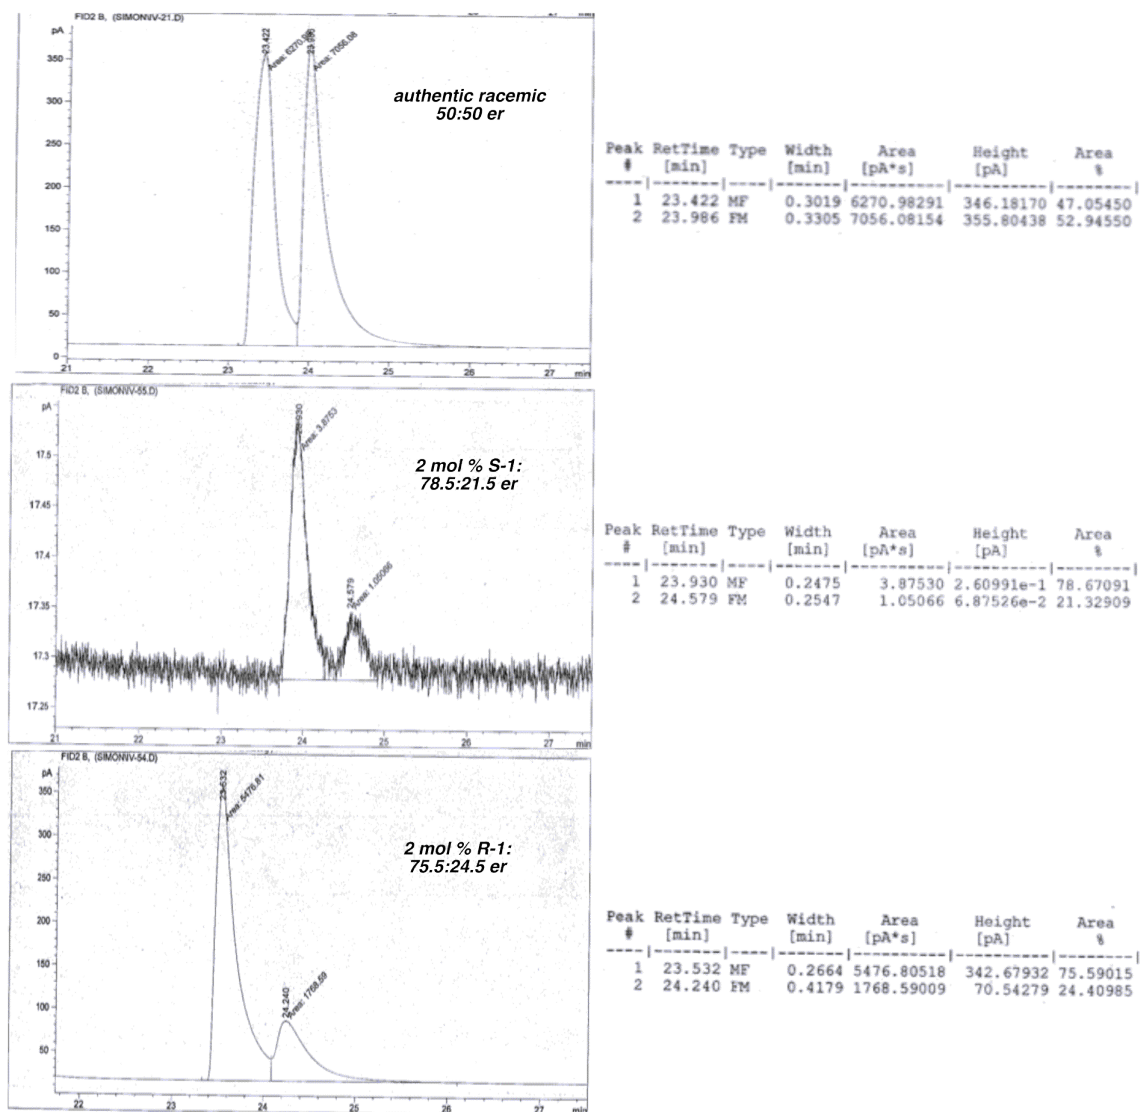

### Synthesis of Tetraene 12:

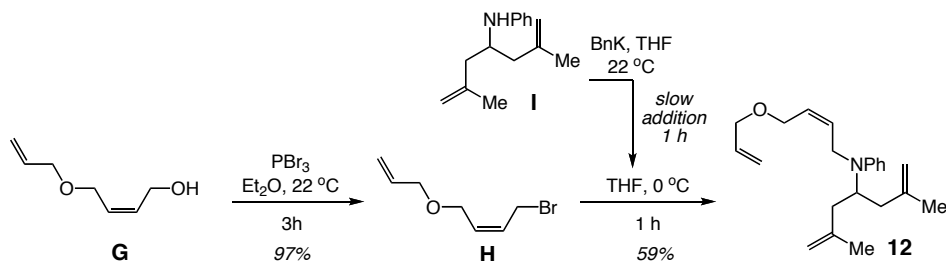

### Synthesis of (Z)-N-(4-(allyloxy)but-2-enyl)-N-(2,6-dimethylhepta-1,6-dien-4-yl) aniline (12).

A 250-mL round-bottom flask with stir bar was charged with alcohol **G** (4.00 g, 31.2 mmol, 1.00 equiv) and Et<sub>2</sub>O (95 mL). Phosphorus tribromide (3.43 mL, 36.5 mmol, 1.17 equiv) was then added slowly over 2 min and the resulting mixture allowed to stir for 2 h at 22 °C. At this time, the reaction was allowed to cool to 0 °C and H<sub>2</sub>O (5 mL) was added *slowly*; the Et<sub>2</sub>O boils rapidly if the reaction is quenched too quickly. The biphasic solution was diluted with H<sub>2</sub>O (50

mL) and transferred to a separating funnel. The organic layer was collected and the aqueous layer washed with Et<sub>2</sub>O (2 x 25 mL). The combined organic layers were washed with saturated aqueous NaHCO<sub>3</sub> (50 mL) and a saturated aqueous solution of NaCl (50 mL), dried over Na<sub>2</sub>SO<sub>4</sub>, filtered, and concentrated *in vacuo* to afford **H** (5.77 g, 30.2 mmol, 96.8% yield) as colorless oil. Allylic bromide **H** is unstable and was used without further purification.

A 50-mL round-bottom flask with stir bar was charged with aniline **I** (1.00 g, 4.64 mmol, 1.00 equiv) and THF (6 mL). In an N<sub>2</sub> filled glove box, benzyl potassium (605 mg, 4.64 mmol, 1.00 equiv) was added to the solution of the aniline in one portion and the mixture allowed to stir at 22 °C for 10 min. A separate 25-mL round-bottom flask with stir bar was charged with allylic bromide **H** (1.77 g, 9.28 mmol, 2.00 equiv) and THF (9 mL) and the mixture allowed to cool to 0 °C. The THF solution of the potassium amide was added dropwise over 1 h to bromide **H** by syringe pump; THF (0.5 mL) was used to rinse any remaining potassium amide from the syringe and added similarly to the reaction mixture. The resulting mixture was allowed to stir at 0 °C for 1 h, then quenched by addition of H<sub>2</sub>O (10 mL) and transferred to a separatory funnel. The organic layer was separated and the aqueous layer washed with Et<sub>2</sub>O (3 x 20 mL). The combined organic layers were washed with saturated aqueous NaCl (50 mL), dried over MgSO<sub>4</sub>, filtered and concentrated *in vacuo*. The resulting crude residue was purified by silica gel column chromatography (30:1 pet ether:Et<sub>2</sub>O) to afford **12** (847 mg, 2.72 mmol, 58.6% yield) as a colorless oil. IR (neat): 3073 (m), 3024 (w), 2968 (m), 2915 (m), 2850 (m), 1647 (m), 1596 (s), 1501 (s), 1446 (m), 1394 (m), 1373 (m), 1347 (m), 1347 (m), 1213 (m), 1142 (m), 1080 (s), 924 (s), 886 (s), 690 (s); <sup>1</sup>H NMR (400 MHz, C<sub>6</sub>D<sub>6</sub>): δ 7.24-7.17 (2H, m), 6.77-6.73 (2H, m), 6.69 (1H, tt, *J* = 7.2, 1.2 Hz), 5.98 (1H, ddt, *J* = 17.2, 10.4, 5.6 Hz), 5.66-5.59 (1H, m), 5.56-5.50 (1H, m), 5.34 (1H, ddd, *J* = 17.2, 3.6, 1.6 Hz), 5.24 (1H, ddd, *J* = 10.4, 3.2, 1.2 Hz), 4.77 (2H, br s), 4.73 (2H, br s), 4.23 (1H, quintet, *J* = 7.2 Hz), 4.15 (2H, dd, *J* = 6.4, 1.6 Hz), 4.06 (2H, ddd, 5.6, 1.2, 1.2 Hz), 3.90-3.86 (2H, m), 2.29 (2H, dd, *J* = 14.4, 7.6 Hz), 2.23 (2H, dd, *J* = 14.4, 6.8 Hz), 1.73 (6H, br s); <sup>13</sup>C NMR (100 MHz, CDCl<sub>3</sub>): δ 148.8, 143.0, 134.8, 133.5, 129.2, 126.6, 117.2, 116.6, 113.5, 112.7, 71.5, 66.0, 54.7, 41.3, 40.8, 22.5; HRMS (ESI<sup>+</sup>) [M+H]<sup>+</sup> calcd for C<sub>22</sub>H<sub>31</sub>NO: 326.2484, found: 326.2492.

#### Enantioselective RCM of Tetraene **12** (eq 2):

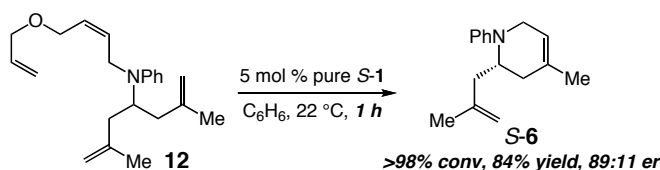

**(S)-4-Methyl-2-(2-methylallyl)-1-phenyl-1,2,3,6-tetrahydropyridine (6).** Following the general procedure, substrate **12** (7.00 mg, 22.5 μmol, 1.00 equiv) was treated with chiral complex **S-1** (1.3 mg, 1.12 μmol, 0.0500 equiv) in C<sub>6</sub>H<sub>6</sub> (225 μL). The vial was tightly capped and the solution was allowed to stir for 1 h at 22 °C. At this time, the reaction vessel was removed from the dry box and the reaction quenched by the addition of benchtop Et<sub>2</sub>O (1 mL). The mixture concentrated *in vacuo*. The unpurified brown solid was dissolved in minimal

MeOH (0.5 mL), and KF (4.80 mg, 0.0830 mmol, 74.1 equiv with respect to *S*-1) was added (to desilylate the phenol ligand **4**, which has the same  $R_f$  as **6**). The mixture was allowed to stir for 30 min at 22 °C. Silica gel was added and the mixture concentrated *in vacuo* and purified by silica gel chromatography (50:1 pet ether:Et<sub>2</sub>O) to afford *S*-6 (4.3 mg, 18.9 μmol, 84.0% yield) as a white solid. The physical and spectral data were identical to those previously reported for compound **6**.<sup>1</sup> The enantiomeric purity of **6** (90:10 er) was determined by GLC analysis (CDGTA column, 20 psi, 130 °C) in comparison with authentic racemic material.

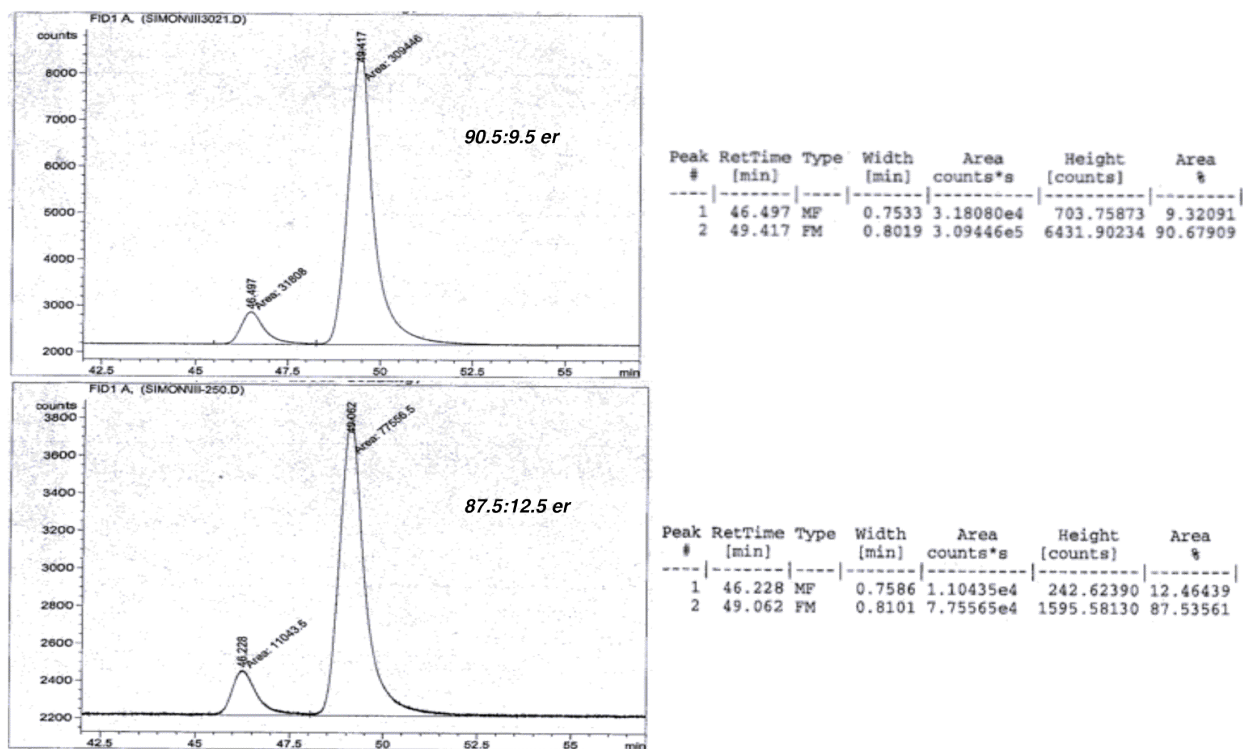

### Enantioselective RCM of Tetraene **12** at 2% Conversion (eq 6):

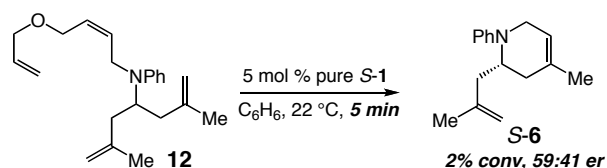

**(S)-4-Methyl-2-(2-methylallyl)-1-phenyl-1,2,3,6-tetrahydropyridine (6)**. Following the general procedure, substrate **12** (12.9 mg, 41.4 μmol, 1.00 equiv) was treated with chiral complex *S*-1 (2.4 mg, 2.07 μmol, 0.0500) in C<sub>6</sub>H<sub>6</sub> (414 μL). The vial was tightly capped and the solution allowed to stir for 5 min at 22 °C. At this time, the reaction vessel was removed from the dry box and the reaction quenched by the addition of benchtop Et<sub>2</sub>O (1 mL). The solution concentrated *in vacuo*. The product was barely visible by 400 MHz <sup>1</sup>H NMR analysis but was easily visualized by TLC (hexanes:Et<sub>2</sub>O 50:1,  $R_f$  ~0.4, UV: -254 nm and CAM stain). The unpurified brown solid was dissolved in minimal MeOH (0.5 mL), and KF (4.80 mg, 0.0830 mmol, 40.0 equiv with respect to *S*-1) was added (to desilylate the phenol **4**, which has the same  $R_f$  as **6**). The mixture was allowed to stir for 30 min at 22 °C. Silica gel was added and the

mixture concentrated *in vacuo* and purified by silica gel chromatography (50:1 pet ether:Et<sub>2</sub>O) to afford **S-6** as a white solid.

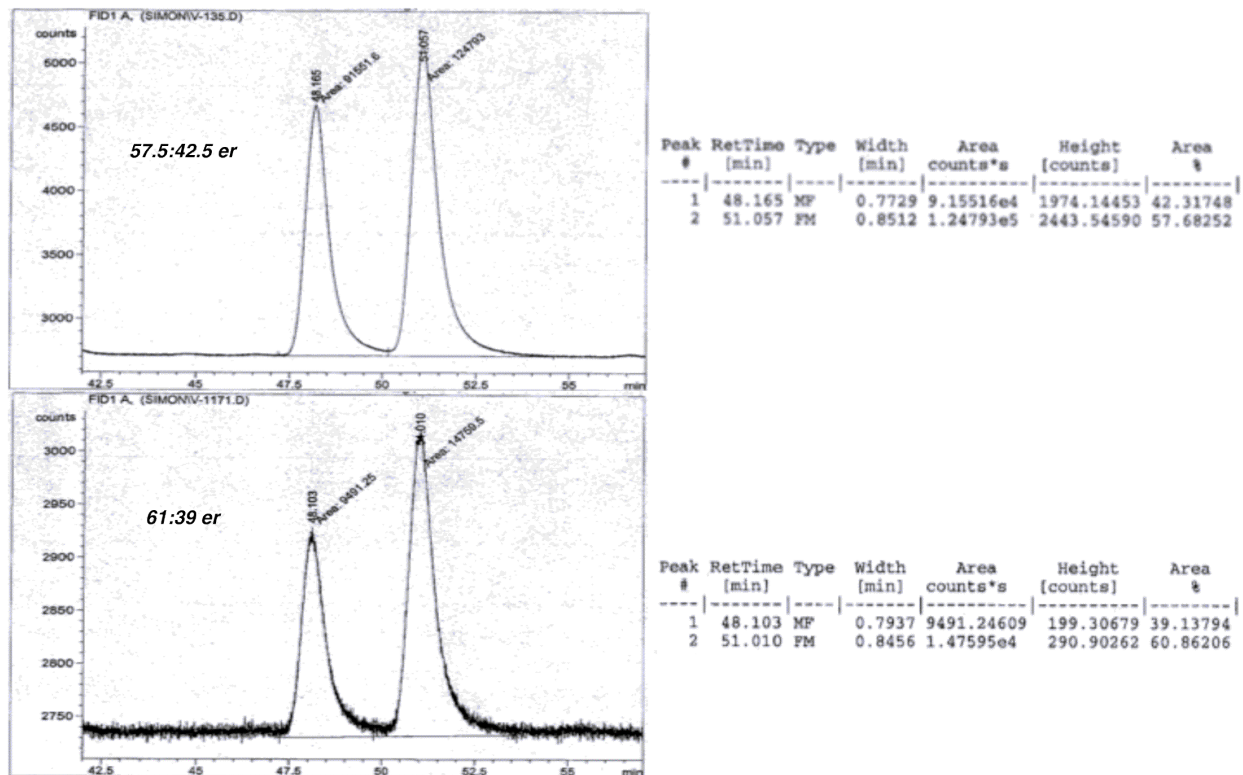

### Synthesis of Allylamine **15**:

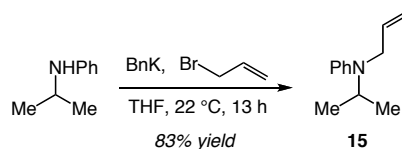

**N-allyl-N-isopropylaniline (15)**: A 50-mL round-bottom flask with magnetic stir bar was brought into an N<sub>2</sub>-filled dry box, charged with benzyl potassium (900 mg, 6.91 mmol, 1.00 equiv), sealed, and brought to the fume hood. THF (13 mL) was added and the mixture allowed to stir. *N*-Isopropylaniline (1.00 mL, 6.91 mmol, 1.00 equiv) was added dropwise by syringe; a light orange color remained. Allyl bromide (1.80 mL, 20.8 mmol, 3.00 equiv) was added dropwise by syringe (caution: the reaction is exothermic and should be cooled); LiBr precipitated immediately. The mixture was allowed to stir for 13 h at 22 °C at which time it was quenched by the addition of H<sub>2</sub>O (20 mL). The solution was washed with Et<sub>2</sub>O (3 x 25 mL). The combined organic layers were washed with H<sub>2</sub>O (2 x 50 mL) and saturated aqueous NaCl (50 mL), then dried over MgSO<sub>4</sub>, filtered, and concentrated *in vacuo* to light yellow oil. The material was purified by silica gel chromatography (50:1 hexanes:Et<sub>2</sub>O) to afford **15** (1.01 g, 5.76 mmol, 83.4% yield) as a light yellow oil. IR (neat): 2970 (s), 2929 (w), 2872 (w), 1595 (s), 1572 (w), 1502 (s), 1464 (m), 1390 (s), 1365 (m), 1348 (m), 1330 (m), 1314 (m), 1300 (m), 1249 (s), 1187 (s), 1160 (m), 1122 (m), 1087 (w), 1035 (m), 1002 (m), 985 (m), 919 (s), 744 (s), 691 (s); <sup>1</sup>H



NMR (400 MHz, CDCl<sub>3</sub>):  $\delta$  7.22-7.18 (2H, m), 6.76-6.72 (2H, m), 6.67 (1H, dd,  $J = 7.2, 7.2$  Hz), 5.89 (1H, dddd,  $J = 17.2, 10.4, 4.4, 4.4$  Hz), 5.23 (1H, ddd,  $J = 17.2, 1.6, 1.6$  Hz), 5.13 (1H, ddd,  $J = 10.4, 2.0, 2.0$  Hz), 4.13 (1H, septet,  $J = 6.4$  Hz), 3.82-3.78 (2H, m), 1.18 (6H, d,  $J = 6.4$  Hz); <sup>13</sup>C NMR (100 MHz, CDCl<sub>3</sub>):  $\delta$  149.2, 136.9, 129.2, 116.2, 115.3, 113.1, 48.0, 46.9, 20.0; HRMS (ESI<sup>+</sup>) [M+H]<sup>+</sup> calcd for C<sub>12</sub>H<sub>18</sub>N: 176.1439, found 176.1432.

### Synthesis of Substrate *d*<sub>3</sub>-15:<sup>10</sup>

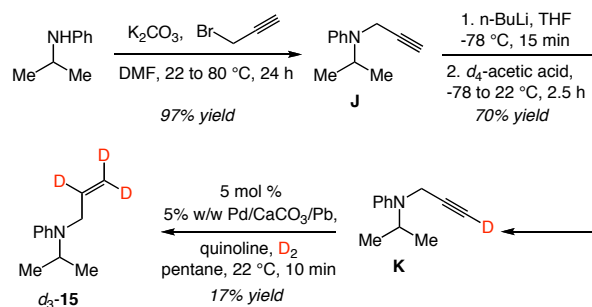

***d*<sub>3</sub>-*N*-allyl-*N*-isopropylaniline (*d*<sub>3</sub>-15):** A 100-mL round-bottom flask with magnetic stir bar was charged with *N*-isopropylaniline (1.00 mL, 6.91 mmol, 1.00 equiv) and DMF (35 mL); the mixture was allowed to stir. K<sub>2</sub>CO<sub>3</sub> (1.43 g, 10.3 mmol, 1.50 equiv) was added quickly in one portion; much of the K<sub>2</sub>CO<sub>3</sub> remained undissolved. Propargyl bromide (1.85 mL, 80% w/w in toluene, 20.8 mmol, 3.00 equiv) was added dropwise by syringe. The vessel was fitted with a flame-dried reflux condenser and the mixture heated to 80 °C. After 20 h, the mixture was allowed to cool to 22 °C and was diluted with H<sub>2</sub>O (50 mL). The mixture was washed with EtOAc (3 x 75 mL). The combined organic layers were washed with H<sub>2</sub>O (2 x 175 mL) and saturated aqueous NaCl (175 mL), then dried over MgSO<sub>4</sub>, filtered, and concentrated *in vacuo* to yellow oil. The material was purified by silica gel chromatography (30:1 hexanes:Et<sub>2</sub>O) to afford **J** (1.16 g, 6.69 mmol, 96.9% yield) as a yellow oil. <sup>1</sup>H NMR (400 MHz, CDCl<sub>3</sub>):  $\delta$  7.30-7.23 (2H, m), 6.94-6.89 (2H, m), 6.77 (1H, ddd,  $J = 7.2, 7.2, 0.8$  Hz), 4.11 (1H, septet,  $J = 6.8$  Hz), 3.95 (2H, d,  $J = 2.4$  Hz), 2.17 (1H, dd,  $J = 2.4, 2.4$  Hz), 1.26 (6H, d,  $J = 6.4$  Hz).

A 100-mL round-bottom flask with magnetic stir bar was charged with alkyne **J** (1.16 g, 6.69 mmol, 1.00 equiv) and THF (25 mL). The mixture was allowed to stir and cool to -78 °C; the mixture was yellow. *n*-BuLi (4.70 mL, 1.56 M in hexanes, 7.33 mmol, 1.10 equiv) was added dropwise by syringe. After 15 min, *d*<sub>4</sub>-acetic acid (540 mL, 10.0 mmol, 1.49 equiv) was added dropwise (syringe) and the mixture was allowed to warm to 22 °C. After 2.5 h, the reaction was quenched by the addition of H<sub>2</sub>O (20 mL). The mixture was washed with Et<sub>2</sub>O (3 x 50 mL). The combined organic layers were dried over MgSO<sub>4</sub>, filtered, and concentrated *in vacuo* to yellow oil, which was purified by silica gel chromatography (30:1 hexanes:Et<sub>2</sub>O) to deliver **K** (817 mg, 4.69 mmol, 70.1% yield) as a yellow oil. <sup>1</sup>H NMR (400 MHz) indicated >98% deuterium incorporation. <sup>1</sup>H NMR (400 MHz, CDCl<sub>3</sub>):  $\delta$  7.30-7.23 (2H, m), 6.94-6.89

(10) For an example of deuterium incorporation into an olefin through Lindlar reduction of an alkyne, see: Ridgway, B. H.; Woerpel, K. A. *J. Org. Chem.* **1998**, *63*, 458–460.

(2H, m), 6.77 (1H, dd,  $J = 7.2$  Hz), 4.11 (1H, septet,  $J = 6.8$  Hz), 3.95 (2H, s), 1.26 (6H, d,  $J = 6.8$  Hz).

A 50-mL round-bottom flask with magnetic stir bar was charged with Lindlar's catalyst (5% w/w Pd on  $\text{CaCO}_3$  poisoned with Pb, 123 mg, 0.0580 mmol, 0.0500 equiv), pentane (20 mL),  $d_1$ -alkyne **K** (202 mg, 1.16 mmol, 1.00 equiv), and quinoline (137 mL, 1.16 mmol, 1.00 equiv). The mixture was allowed to stir and the atmosphere was purged with a balloon of  $\text{D}_2$ . The reaction vessel was fitted with a balloon of  $\text{D}_2$ . After 10 min at 22 °C, the balloon was removed and the vessel was flushed with  $\text{N}_2$ . The mixture was passed through a plug of Celite® (eluted with  $\text{Et}_2\text{O}$ ) and concentrated *in vacuo* to a lightly yellow oil. The mixture was purified by silica gel chromatography (70:1 hexanes: $\text{Et}_2\text{O}$ ) to afford  $d_3$ -**15** (35.0 mg, 0.196 mmol, 16.9% yield).  $^1\text{H}$  NMR (400 MHz) indicated >98% deuterium incorporation. IR (neat): 3023 (s), 2971 (w), 2928 (w), 1598 (s), 1504 (s), 1464 (w), 1391 (m), 1365 (w), 1349 (m), 1330 (m), 1314 (m), 1250 (m), 1189 (s), 1160 (w), 1041 (w), 747 (s), 715 (m), 691 (m);  $^1\text{H}$  NMR (400 MHz,  $\text{CDCl}_3$ ):  $\delta$  7.22-7.18 (2H, m), 6.76-6.72 (2H, m), 6.67 (1H, ddd,  $J = 7.2, 7.2, 1.2$  Hz), 4.13 (1H, septet,  $J = 6.8$  Hz), 3.79 (2H, s), 1.18 (6H, d,  $J = 6.4$  Hz);  $^2\text{H}$  NMR (76.7 MHz,  $\text{CDCl}_3$ ):  $\delta$  5.391 (1D, br s), 5.25 (1D, br s), 5.15 (1D, br s);  $^{13}\text{C}$  NMR (100 MHz,  $\text{CDCl}_3$ ):  $\delta$  149.2, 136.4 (t,  $J_{\text{C-D}} = 23.6$  Hz), 129.2, 116.2, 114.7 (dt,  $J_{\text{C-D}} = 47.8, 23.9$  Hz), 113.1, 48.0, 46.8, 20.0; HRMS (ESI<sup>+</sup>) [ $\text{M}+\text{H}$ ]<sup>+</sup> calcd for  $\text{C}_{12}^1\text{H}_{15}^2\text{H}_3\text{N}$ : 179.1628, found: 179.1631.

### Crossover Experiment in eq 3:

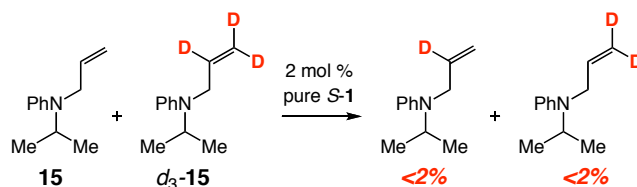

In an  $\text{N}_2$ -filled dry box, a 4-mL vial with stir bar was charged with **15** (5.2 mg, 30  $\mu\text{mol}$ , 1.2 equiv),  $d_3$ -**15** (4.5 mg, 25  $\mu\text{mol}$ , 1.0 equiv), and  $\text{C}_6\text{H}_6$  (450  $\mu\text{L}$ ). A 4-mL vial was charged with (*S*)-**1**-*n*-pentane (1.2 mg, 1.1  $\mu\text{mol}$ , 0.020 equiv with respect to **15** +  $d_3$ -**15**) and  $\text{C}_6\text{H}_6$  (55  $\mu\text{L}$ ). The catalyst solution was transferred to the reaction mixture by a pipet; the vial containing the catalyst was rinsed with  $\text{C}_6\text{H}_6$  (45  $\mu\text{L}$ ) and similarly transferred. The vial was tightly capped and the mixture was allowed to stir for 30 min at 22 °C. The vessel was removed from the dry box and the reaction quenched by the addition of benchtop  $\text{Et}_2\text{O}$  (~0.5 mL). The mixture was concentrated *in vacuo* to afford brown oil, which was dissolved in MeOH (~0.5 mL). KF (19.1 mg, 0.330 mmol, 300 equiv with respect to *S*-**1**) was added in order to remove the silyl group of the phenol ligand **4**. After the sample was allowed to stand for 30 min at 22 °C, silica gel was added and the mixture concentrated *in vacuo* and purified by silica gel chromatography (50:1 hexanes: $\text{Et}_2\text{O}$ ). A mixture of **15** and  $d_3$ -**15** was recovered as colorless oil (6.3 mg, 36.0  $\mu\text{mol}$ , 65% recovery). High-resolution mass spectroscopic analysis indicated that crossover to generate  $d_1$ -**15** and  $d_2$ -**15** had not occurred. HRMS (ESI<sup>+</sup>) [ $\text{M}+\text{H}$ ]<sup>+</sup> calcd for  $\text{C}_{12}\text{H}_{18}\text{N}$ : 176.1439, found: 176.1437; calcd for  $\text{C}_{12}^1\text{H}_{17}^2\text{H}_1\text{N}$ : 177.1502, not found; calcd for  $\text{C}_{12}^1\text{H}_{16}^2\text{H}_2\text{N}$ : 178.1565, not found; calcd for  $\text{C}_{12}^1\text{H}_{15}^2\text{H}_3\text{N}$ : 179.1628, found: 179.1624.

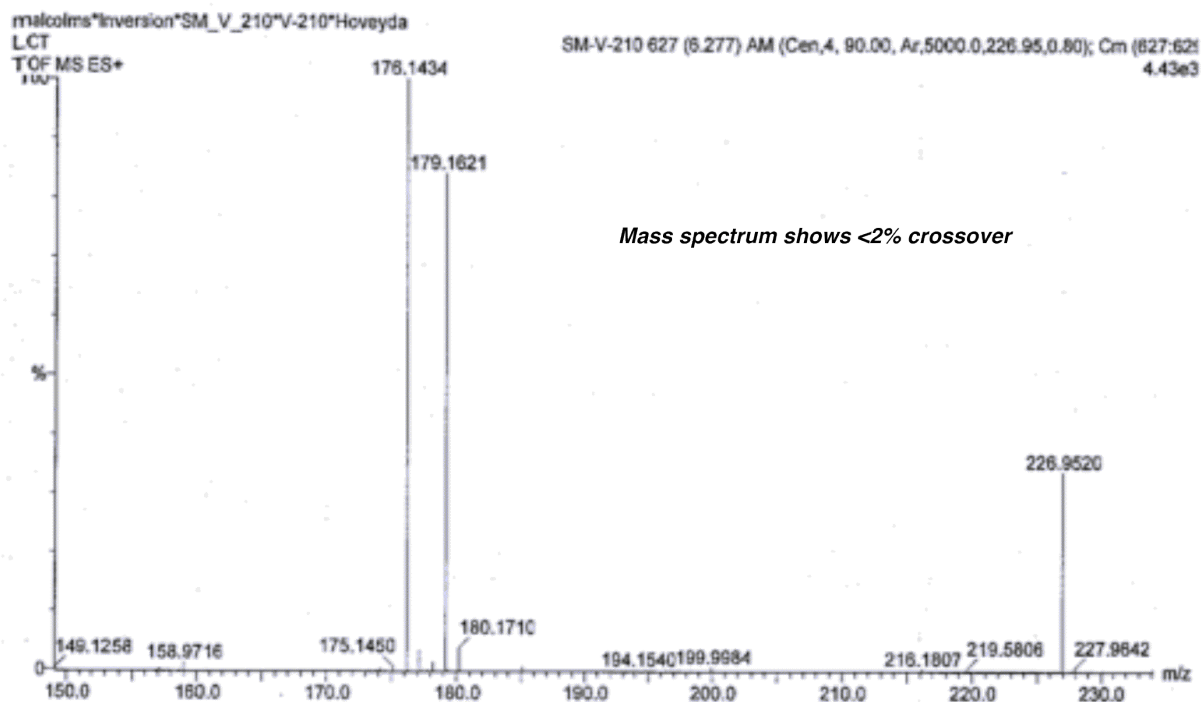

### Crossover Experiment in the Presence of Ethylene:

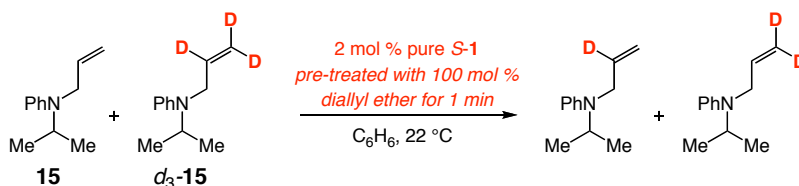

In an  $\text{N}_2$ -filled dry box, a 2-mL vial with stir bar was charged with **15** (6.0 mg, 34  $\mu\text{mol}$ , 1.1 equiv), ***d*<sub>3</sub>-15** (5.4 mg, 30  $\mu\text{mol}$ , 1.0 equiv), and  $\text{C}_6\text{H}_6$  (100  $\mu\text{L}$ ). A 4-mL vial was charged with (*S*)-**1**-*n*-pentane (1.5 mg, 1.3  $\mu\text{mol}$ , 0.020 equiv with respect to **15** + ***d*<sub>3</sub>-15**) and  $\text{C}_6\text{H}_6$  (340  $\mu\text{L}$ ). Diallyl ether (8  $\mu\text{L}$ , 65  $\mu\text{mol}$ , 1.0 equiv with respect to **15** + ***d*<sub>3</sub>-15**) was added to the catalyst solution by syringe. The vial was tightly capped and the mixture was allowed to stir for one minute at 22 °C. At that time, the solution of **15** + ***d*<sub>3</sub>-15** was transferred to the reaction mixture by a pipet; the vial containing the catalyst was rinsed with  $\text{C}_6\text{H}_6$  (2 x 100  $\mu\text{L}$ ) and similarly transferred. The vial was tightly capped and the mixture was allowed to stir for 30 minutes at 22 °C. The vessel was removed from the dry box and the reaction quenched by the addition of benchtop  $\text{Et}_2\text{O}$  (~1 mL). The mixture was concentrated *in vacuo* to furnish brown oil, which was dissolved in MeOH (~0.5 mL). KF (22.7 mg, 0.390 mmol, 300 equiv with respect to *S*-**1**) was added in order to remove the silyl unit of the phenol ligand **4**. After standing for 30 min at 22 °C, silica gel was added and the mixture concentrated *in vacuo*; the resulting tan-colored solid was purified by silica gel chromatography (50:1 hexanes: $\text{Et}_2\text{O}$ ). A mixture of **15**, ***d*<sub>1</sub>-15**, ***d*<sub>2</sub>-15**, and ***d*<sub>3</sub>-15** (unquantifiable ratio) was recovered as colorless oil (8.2 mg, ~46.0  $\mu\text{mol}$ , ~72% recovery). High-resolution mass spectroscopic analysis indicated that cross-over to generate ***d*<sub>1</sub>-15** and ***d*<sub>2</sub>-15** had occurred. HRMS (ESI<sup>+</sup>)  $[\text{M}+\text{H}]^+$  calcd for  $\text{C}_{12}\text{H}_{18}\text{N}$ : 176.1439, found:

176.1434; calcd for  $C_{12}^1H_{17}^2H_1N$ : 177.1502, found: 177.1497; calcd for  $C_{12}^1H_{16}^2H_2N$ : 178.1565, found: 178.1564; calcd for  $C_{12}^1H_{15}^2H_3N$ : 179.1628, found: 179.1634.

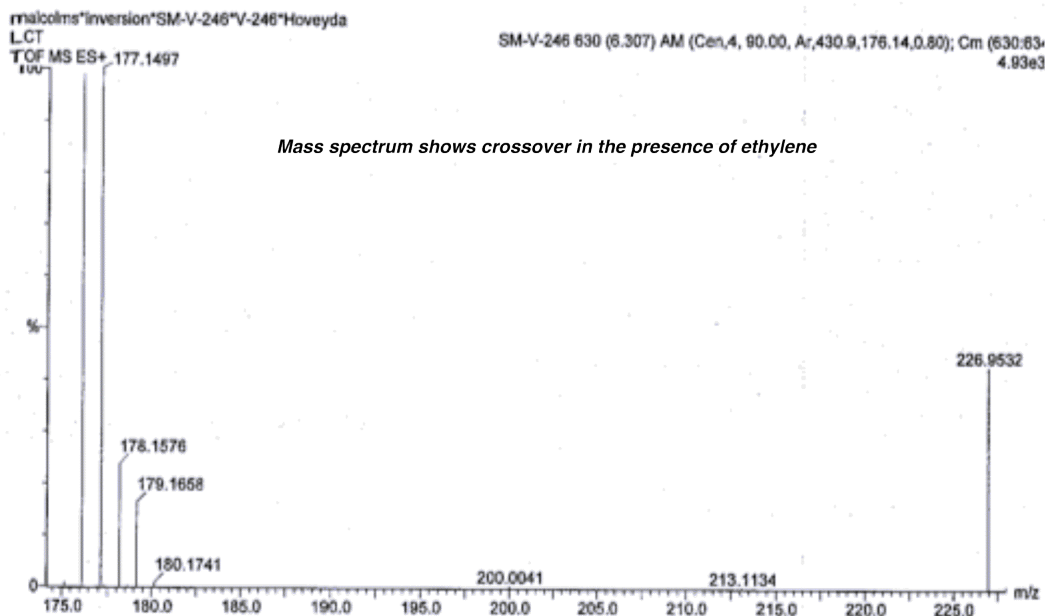

### Synthesis of Triene $d_3$ -5:<sup>10</sup>

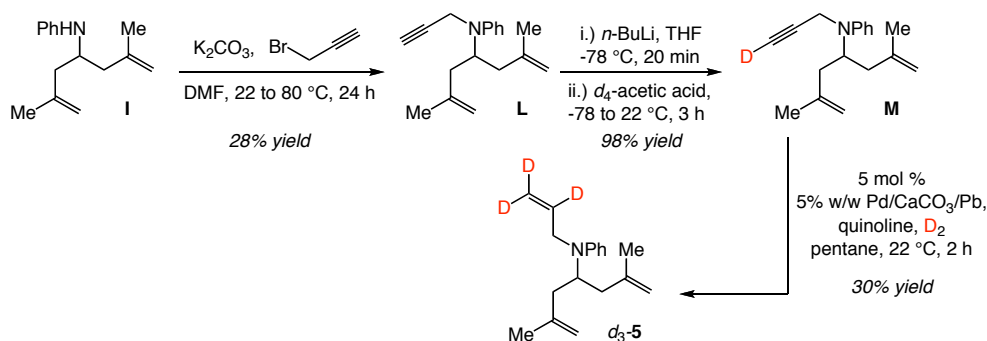

**$d_3$ -*N*-allyl-*N*-(2,6-dimethylhepta-1,6-dien-4-yl)aniline ( $d_3$ -5):** A 25-mL round-bottom flask with magnetic stir bar was charged with  $K_2CO_3$  (733 mg, 5.30 mmol, 1.50 equiv) and DMF (5 mL); the mixture was allowed to stir. A solution of aniline **I** (761 mg, 3.53 mmol, 1.00 equiv) in DMF (1 mL) was added by cannula (flask containing aniline **I** was rinsed with 1 mL DMF and similarly transferred). Propargyl bromide (1.75 mL, 80% w/w in toluene, 14.1 mmol, 3.99 equiv) was added dropwise by syringe; the mixture became orange. The reaction vessel was fitted with a flame-dried reflux condenser and the mixture heated to 80 °C. After 24 h, the mixture was allowed to cool to 22 °C and was diluted with  $H_2O$  (10 mL). The mixture was washed with EtOAc (4 x 40 mL). The combined organic layers were washed with  $H_2O$  (125 mL) and saturated aqueous NaCl (125 mL), then dried over  $MgSO_4$ , filtered, and concentrated *in vacuo* to yellow oil. The material was purified by silica gel chromatography (100:1 hexanes:Et<sub>2</sub>O) to afford **L** (254 mg, 1.00 mmol, 28.3% yield) as a yellow oil. <sup>1</sup>H NMR (400 MHz,  $CDCl_3$ ):  $\delta$  7.35-7.25 (2H, m), 6.98-6.90 (2H, m), 6.77 (1H, dd,  $J = 7.2, 7.2$  Hz), 4.79 (4H,

apparent s), 4.28 (1H, quintet,  $J = 7.2$  Hz), 3.97 (2H, d,  $J = 2.4$  Hz), 2.44-2.32 (4H, m), 2.15 (1H, dd,  $J = 2.4, 2.4$  Hz), 1.77 (6H, s).

A 25-mL round-bottom flask with magnetic stir bar was charged with alkyne **L** (254 mg, 1.00 mmol, 1.00 equiv) and THF (4 mL). The mixture was allowed to stir and cool to  $-78$  °C; the mixture was yellow. *n*-BuLi (710 mL, 1.56 M in hexanes, 1.11 mmol, 1.11 equiv) was added dropwise by syringe; the mixture became orange. After 20 min, *d*<sub>4</sub>-acetic acid (80 mL, 1.49 mmol, 1.49 equiv) was added dropwise by syringe and the mixture once again became yellow. The mixture was allowed to warm to 22 °C. After 3 h, the reaction was quenched by the addition of H<sub>2</sub>O (10 mL). The mixture was washed with Et<sub>2</sub>O (3 x 25 mL). The combined organic layers were washed with H<sub>2</sub>O (75 mL), dried over MgSO<sub>4</sub>, filtered, and concentrated *in vacuo* to a yellow oil, which was purified by silica gel chromatography (70:1 hexanes:Et<sub>2</sub>O) to deliver **M** (250 mg, 0.983 mmol, 98.3% yield) as a yellow oil. <sup>1</sup>H NMR (400 MHz) indicated >98% incorporation of deuterium. <sup>1</sup>H NMR (400 MHz, CDCl<sub>3</sub>): δ 7.35-7.25 (2H, m), 6.98-6.90 (2H, m), 6.77 (1H, dd,  $J = 7.2, 7.2$  Hz), 4.79 (4H, apparent s), 4.28 (1H, quintet,  $J = 7.2$  Hz), 3.97 (2H, s), 2.44-2.32 (4H, m), 1.77 (6H, s).

A round-bottom flask with magnetic stir bar was charged with Lindlar's catalyst (5% w/w Pd on CaCO<sub>3</sub> poisoned with Pb, 102 mg, 0.0480 mmol, 0.0500 equiv), pentane (14 mL), *d*<sub>1</sub>-alkyne **M** (244 mg, 0.959 mmol, 1.00 equiv), and quinoline (115 mL, 0.973 mmol, 1.01 equiv). The mixture was allowed to stir and the atmosphere was purged with a balloon of D<sub>2</sub>. The reaction vessel was then fitted with a balloon of D<sub>2</sub>. After 2 h at 22 °C, the balloon was removed and the reaction vessel was flushed with N<sub>2</sub>. The mixture was passed through a plug of Celite® (eluted with Et<sub>2</sub>O) and concentrated *in vacuo* to a light yellow oil. The mixture was purified by silica gel chromatography (top half of solid phase was 15% w/w AgNO<sub>3</sub>-impregnated silica gel, bottom half was silica gel, 1:1 hexanes:Et<sub>2</sub>O) to afford *d*<sub>3</sub>-**5** (74.0 mg, 0.286 mmol, 29.8% yield). <sup>1</sup>H NMR (400 MHz) indicated >98% incorporation of deuterium. IR (neat): 3211 (w), 3072 (w), 2968 (w), 2917 (w), 2852 (w), 1648 (w), 1597 (s), 1501 (s), 1445 (m), 1393 (m), 1373 (m), 1346 (m), 1321 (m), 1291 (m), 1250 (m), 1214 (m), 1175 (w), 1147 (m), 1038 (w), 987 (w), 957 (w), 886 (s), 745 (s), 713 (s), 689 (s); <sup>1</sup>H NMR (400 MHz, CDCl<sub>3</sub>): δ 7.23-7.16 (2H, m), 6.82-6.76 (2H, m), 6.68 (1H, dd,  $J = 7.2, 7.2$  Hz), 4.76 (2H, s), 4.73 (2H, s), 4.24 (1H, quintet,  $J = 7.2$  Hz), 3.84 (2H, s), 2.30 (2H, dd,  $J_{AB} = 14.4$  Hz,  $J_{AX} = 7.2$  Hz), 2.23 (2H, dd,  $J_{AB} = 14.4$  Hz,  $J_{BX} = 7.2$  Hz), 1.73 (6H, s); <sup>2</sup>H NMR (76.7 MHz, CDCl<sub>3</sub>): δ 5.83 (1D, br s), 5.22 (1D, br s), 5.13 (1D, br s); <sup>13</sup>C NMR (100 MHz, CDCl<sub>3</sub>): δ 149.1, 143.2, 136.4 (t,  $J_{C-D} = 23.5$  Hz), 129.1, 116.6, 115.3 (dt,  $J_{C-D} = 47.5, 23.9$  Hz), 113.8, 112.7, 54.8, 46.5, 40.9, 22.6; HRMS (ESI<sup>+</sup>) [M+H]<sup>+</sup> calcd for C<sub>18</sub>H<sub>23</sub><sup>2</sup>H<sub>3</sub>N: 259.2254, found: 259.2257.

## Enantioselective RCM Crossover Experiment in eq 4:

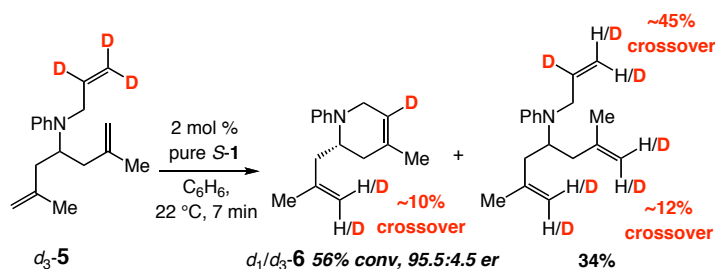

In an  $N_2$ -filled dry box, a 4-mL vial with stir bar was charged with **5** (9.8 mg, 38  $\mu$ mol, 1.0 equiv), and  $C_6H_6$  (280  $\mu$ L). A 2-mL vial was charged with (*S*)-**1** (*n*-pentane) (0.9 mg, 0.76  $\mu$ mol, 0.020 equiv) and  $C_6H_6$  (50  $\mu$ L). The catalyst solution was transferred to the reaction mixture by pipet; the vial containing the catalyst was rinsed with  $C_6H_6$  (50  $\mu$ L) and similarly transferred. The vial was tightly capped and the mixture was allowed to stir for 7 min. The reaction vessel was removed from the dry box and the reaction quenched by the addition of benchtop  $Et_2O$  (~0.5 mL). The mixture was concentrated *in vacuo* to brown oil.  $^1H$  NMR analysis (400 MHz) indicated 56% conversion to **6** plus remaining **5**. The mixture was dissolved in MeOH (~0.5 mL) and KF (13.2 mg, 0.228 mmol, 300 equiv with respect to *S*-**1**) was added in order to desilylate the phenol ligand **4**, which has the same  $R_f$  as **6**. After standing for 30 min at 22  $^\circ C$ , silica gel was added and the mixture concentrated *in vacuo* and purified by silica gel chromatography (hexanes to elute **5** and then 50:1 hexanes: $Et_2O$  to elute **6**).  $d_1/d_3/d_5/d_7-5$  (3.3 mg, ~13.0  $\mu$ mol, ~34% recovery) was obtained as a colorless oil and  $d_1/d_3/d_5-6$  (4.4 mg, ~19  $\mu$ mol, ~50% yield) obtained as a white solid. The spectral data for **5** and **6** were identical to those detailed previously except for deuterium incorporation at the relevant sites (see below). The enantiomeric purity of **6** (95.5:4.5 er) was determined by GLC analysis (CDGTA column, 20 psi, 130  $^\circ C$ ) in comparison with authentic racemic material.

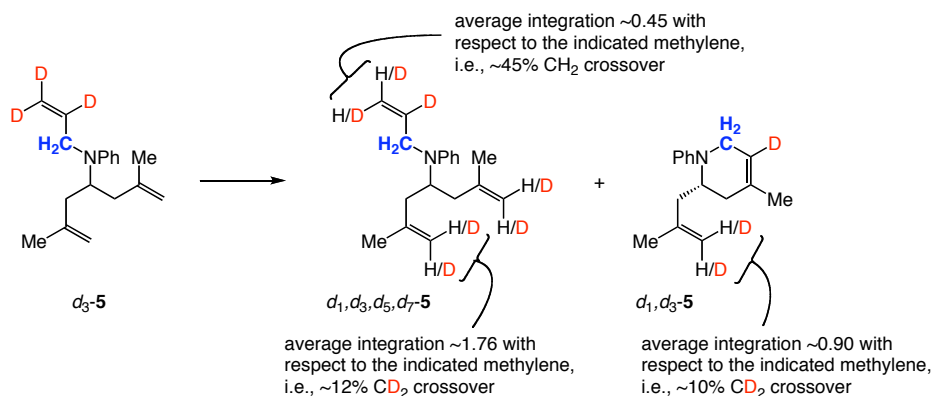

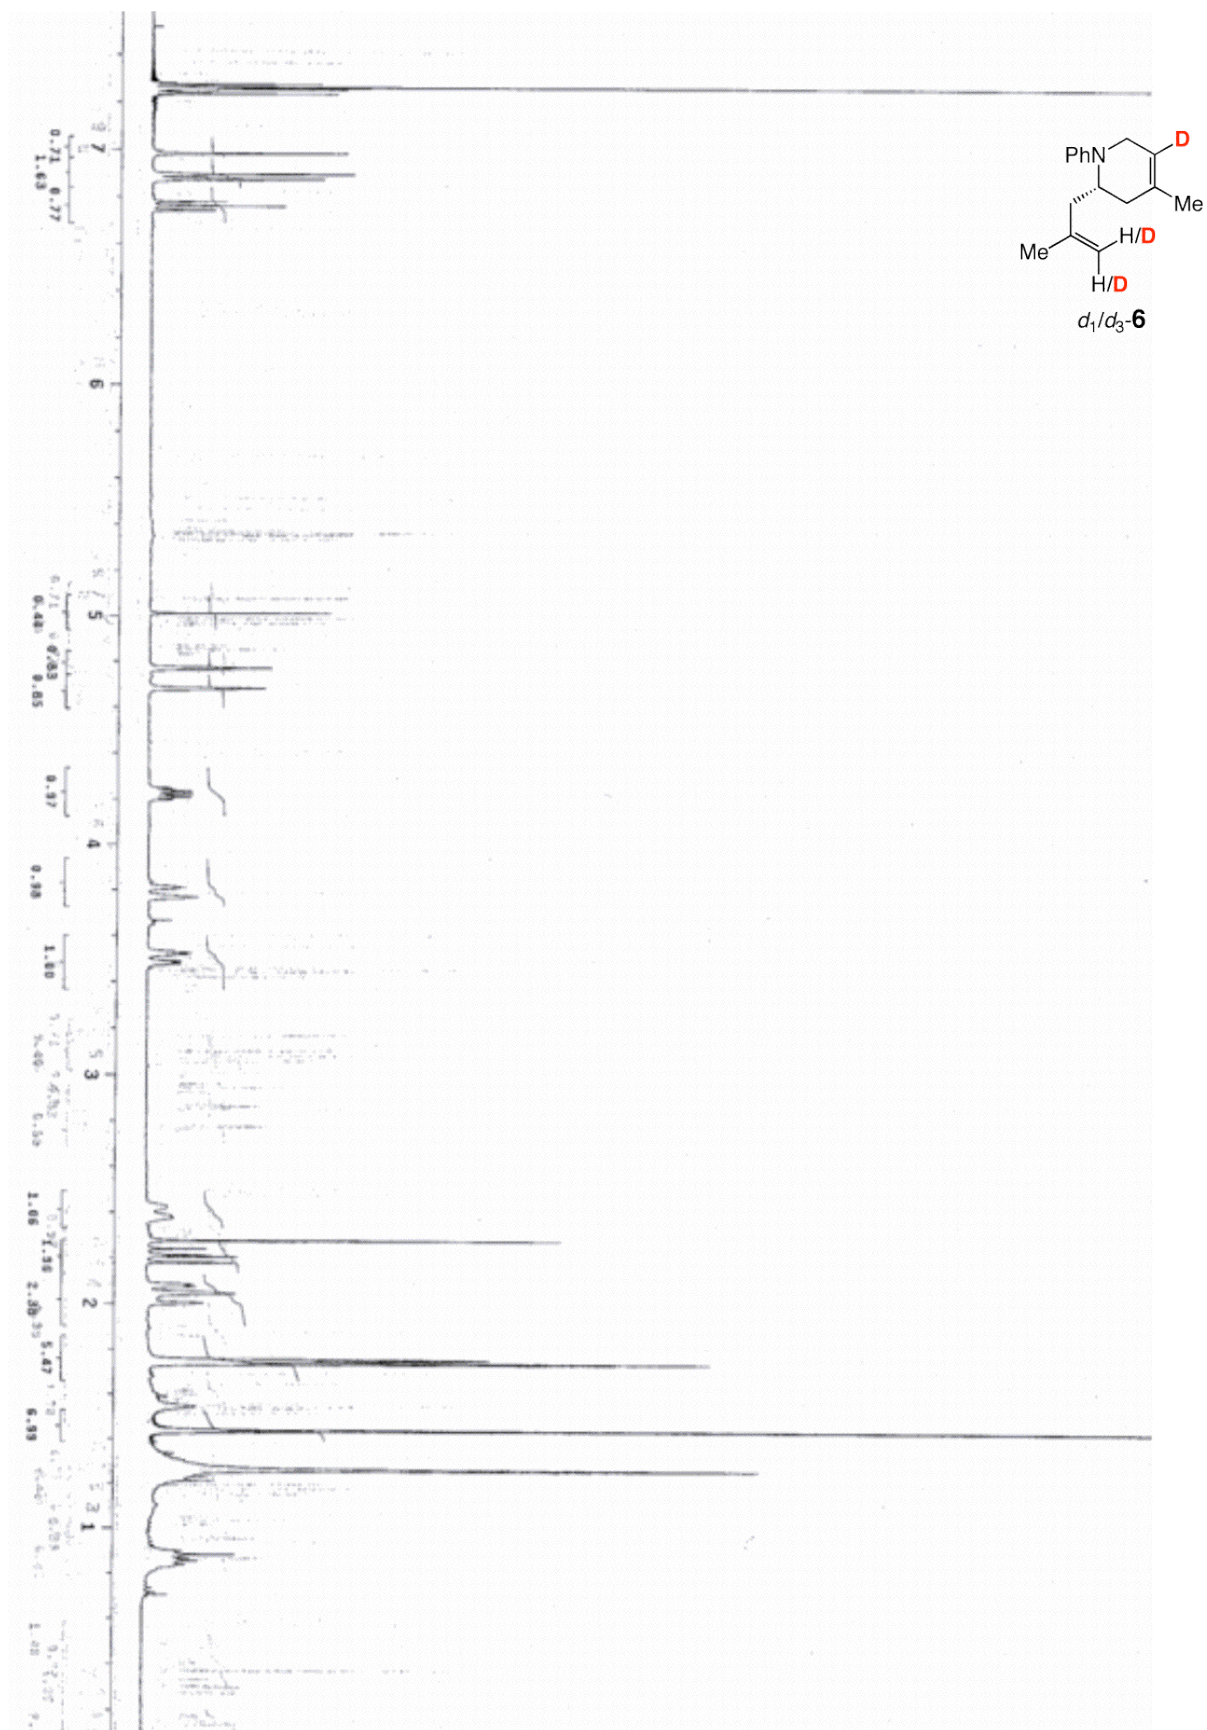

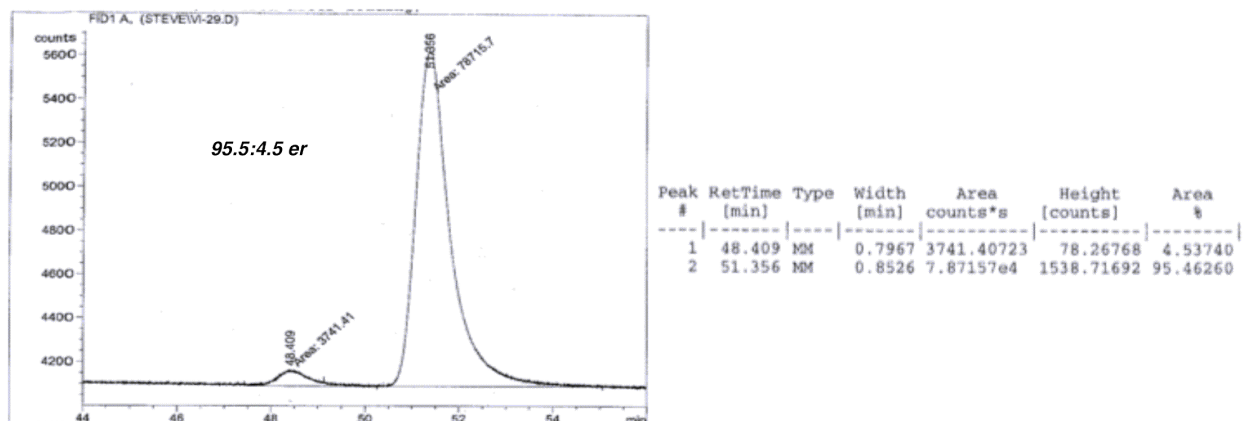

### ■ Addendum to Reference 10:

#### Additional examples of Curtin-Hammett kinetics reported in the connection with catalytic enantioselective reactions:

- (1) MacNeil, P. A.; Roberts, N. K.; Bosnich, B. *J. Am. Chem. Soc.* **1981**, *103*, 2273–2280.
- (2) Auburn, P. R.; Mackenzie, P. B.; Bosnich, B. *J. Am. Chem. Soc.* **1985**, *107*, 2033–2046.
- (3) Mackenzie, P. B.; Whelan, J.; Bosnich, B. *J. Am. Chem. Soc.* **1985**, *107*, 2046–2054.
- (4) Trost, B. M.; Toste, F. D. *J. Am. Chem. Soc.* **1999**, *121*, 4545–4554.
- (5) Hughes, D. L.; Palucki, M.; Yasuda, N.; Reamer, R. A.; Reider, P. J. *J. Org. Chem.* **2002**, *67*, 2762–2768.
- (6) Solladié-Cavallo, A.; Jierry, L.; Klein, A.; Schmitt, M.; Welter, R. *Tetrahedron: Asymmetry* **2004**, *15*, 3891–3898.
- (7) Denmark, S. E.; Bui, T. *J. Org. Chem.* **2005**, *70*, 10393–10399.
- (8) Blank, N. F.; Moncarz, J. R.; Brunker, T. J.; Scriban, C.; Anderson, B. J.; Amir, O.; Glueck, D. S.; Zakharov, L. N.; Golen, J. A.; Incarvito, C. D.; Rheingold, A. L. *J. Am. Chem. Soc.* **2007**, *129*, 6847–6858.



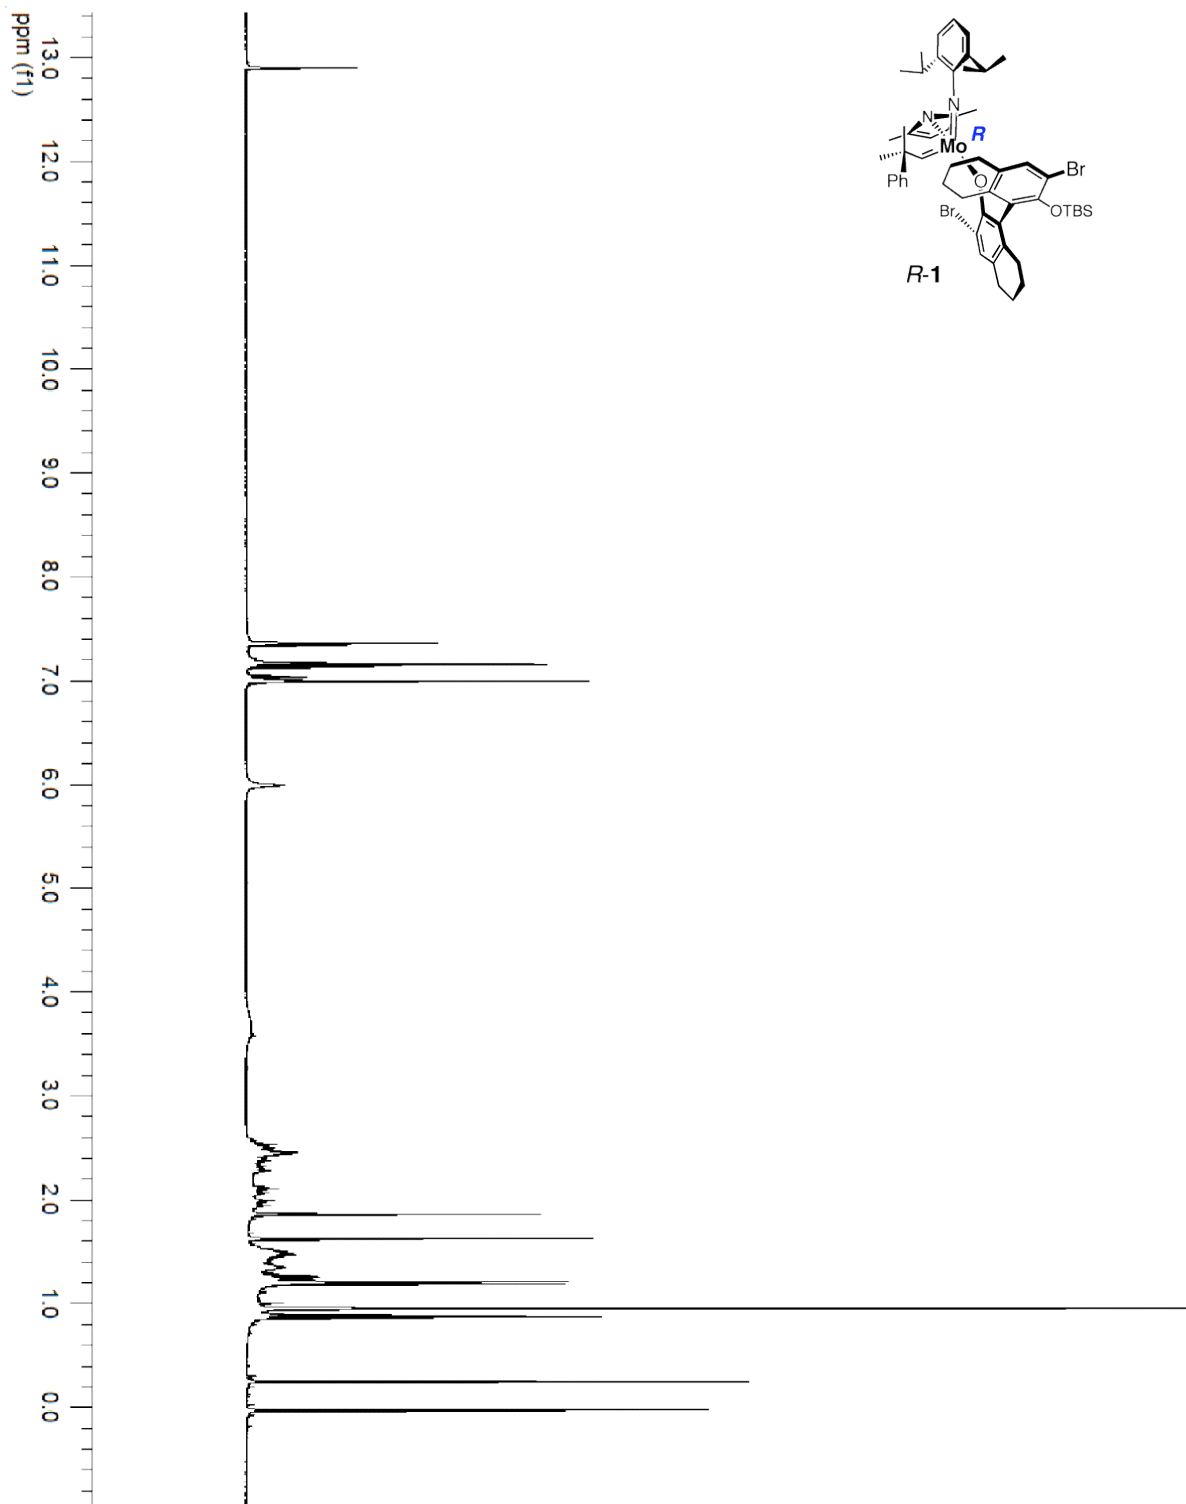

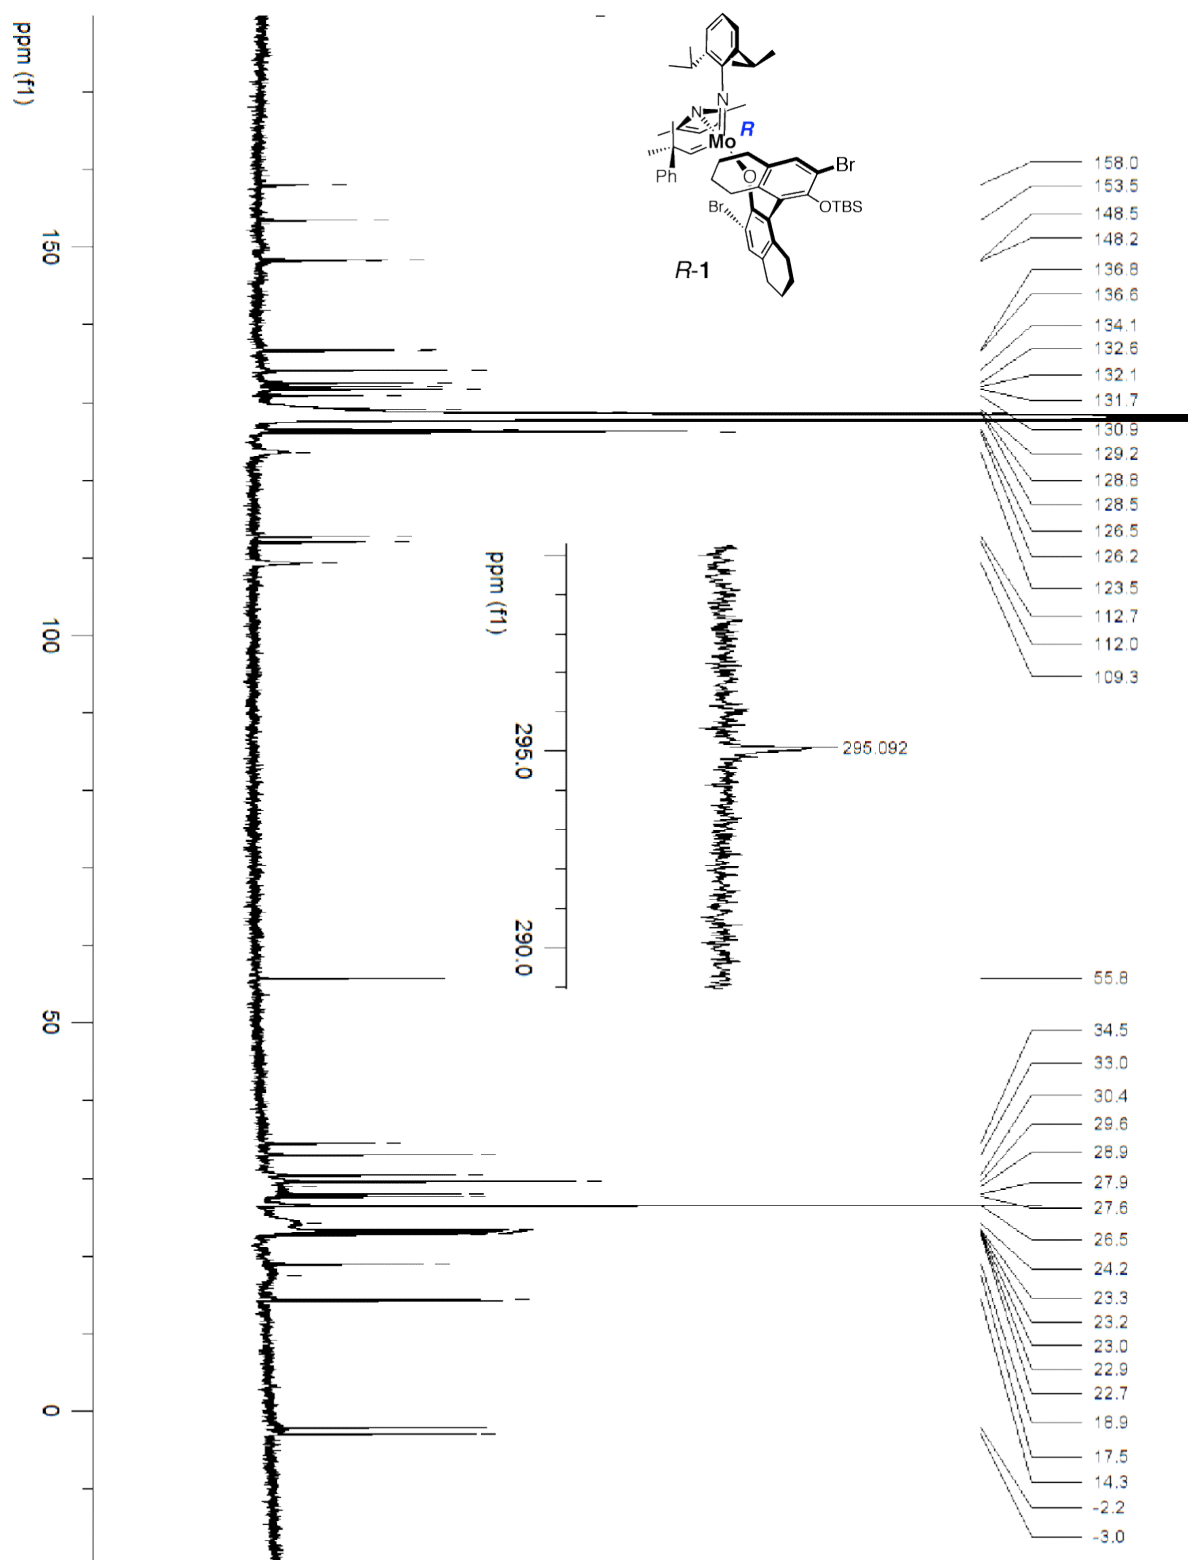

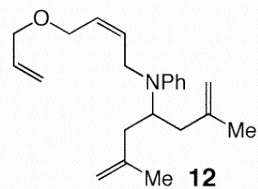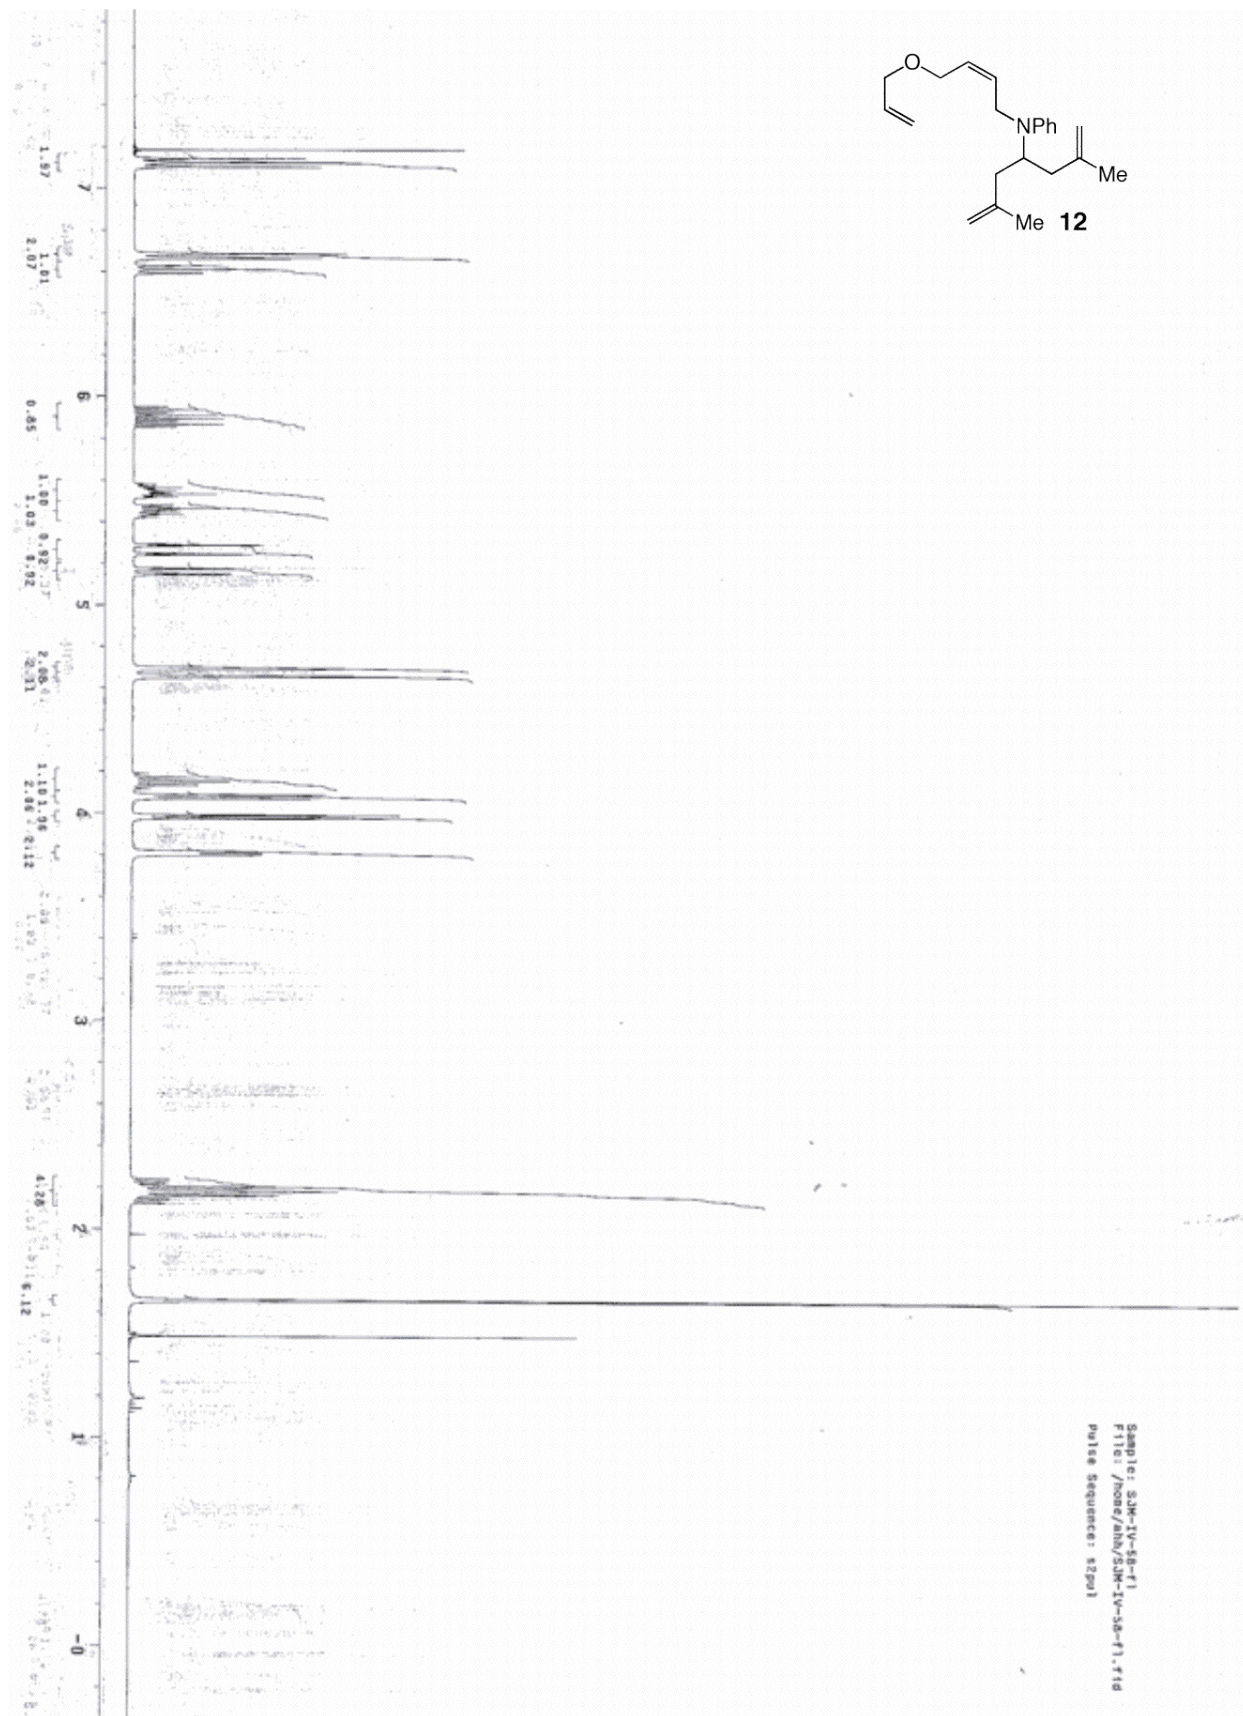

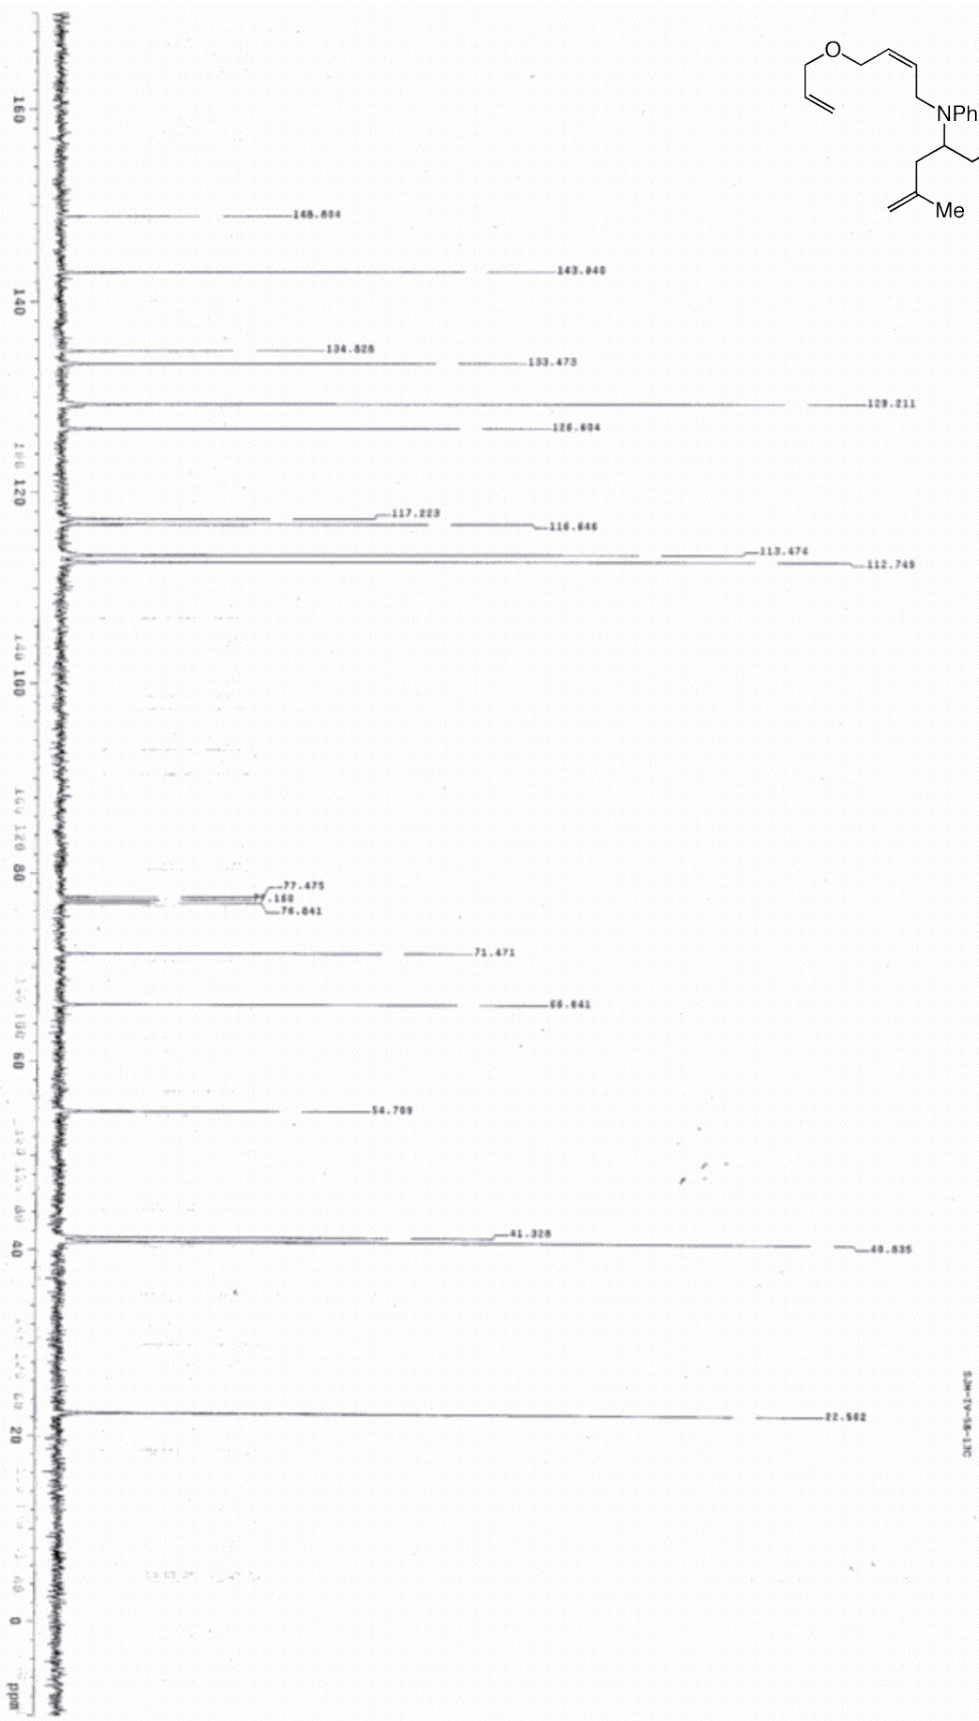

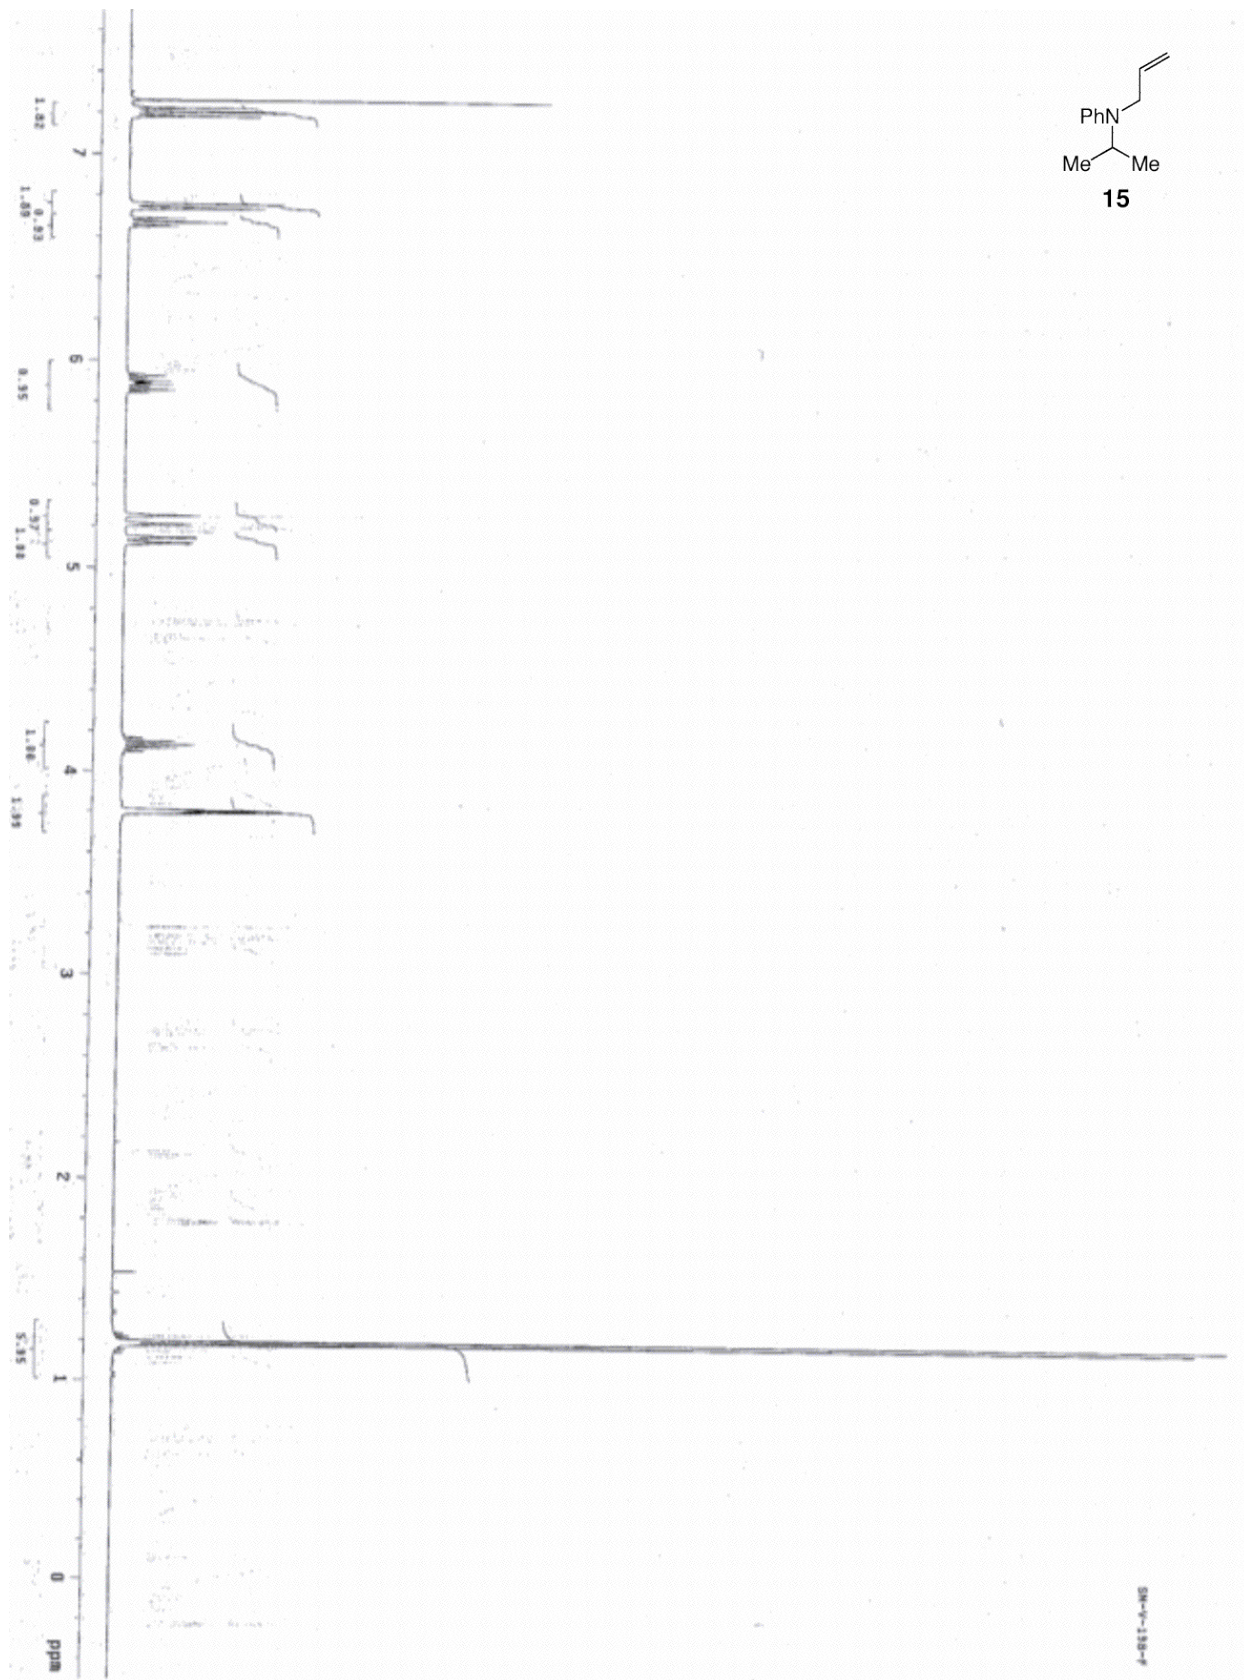

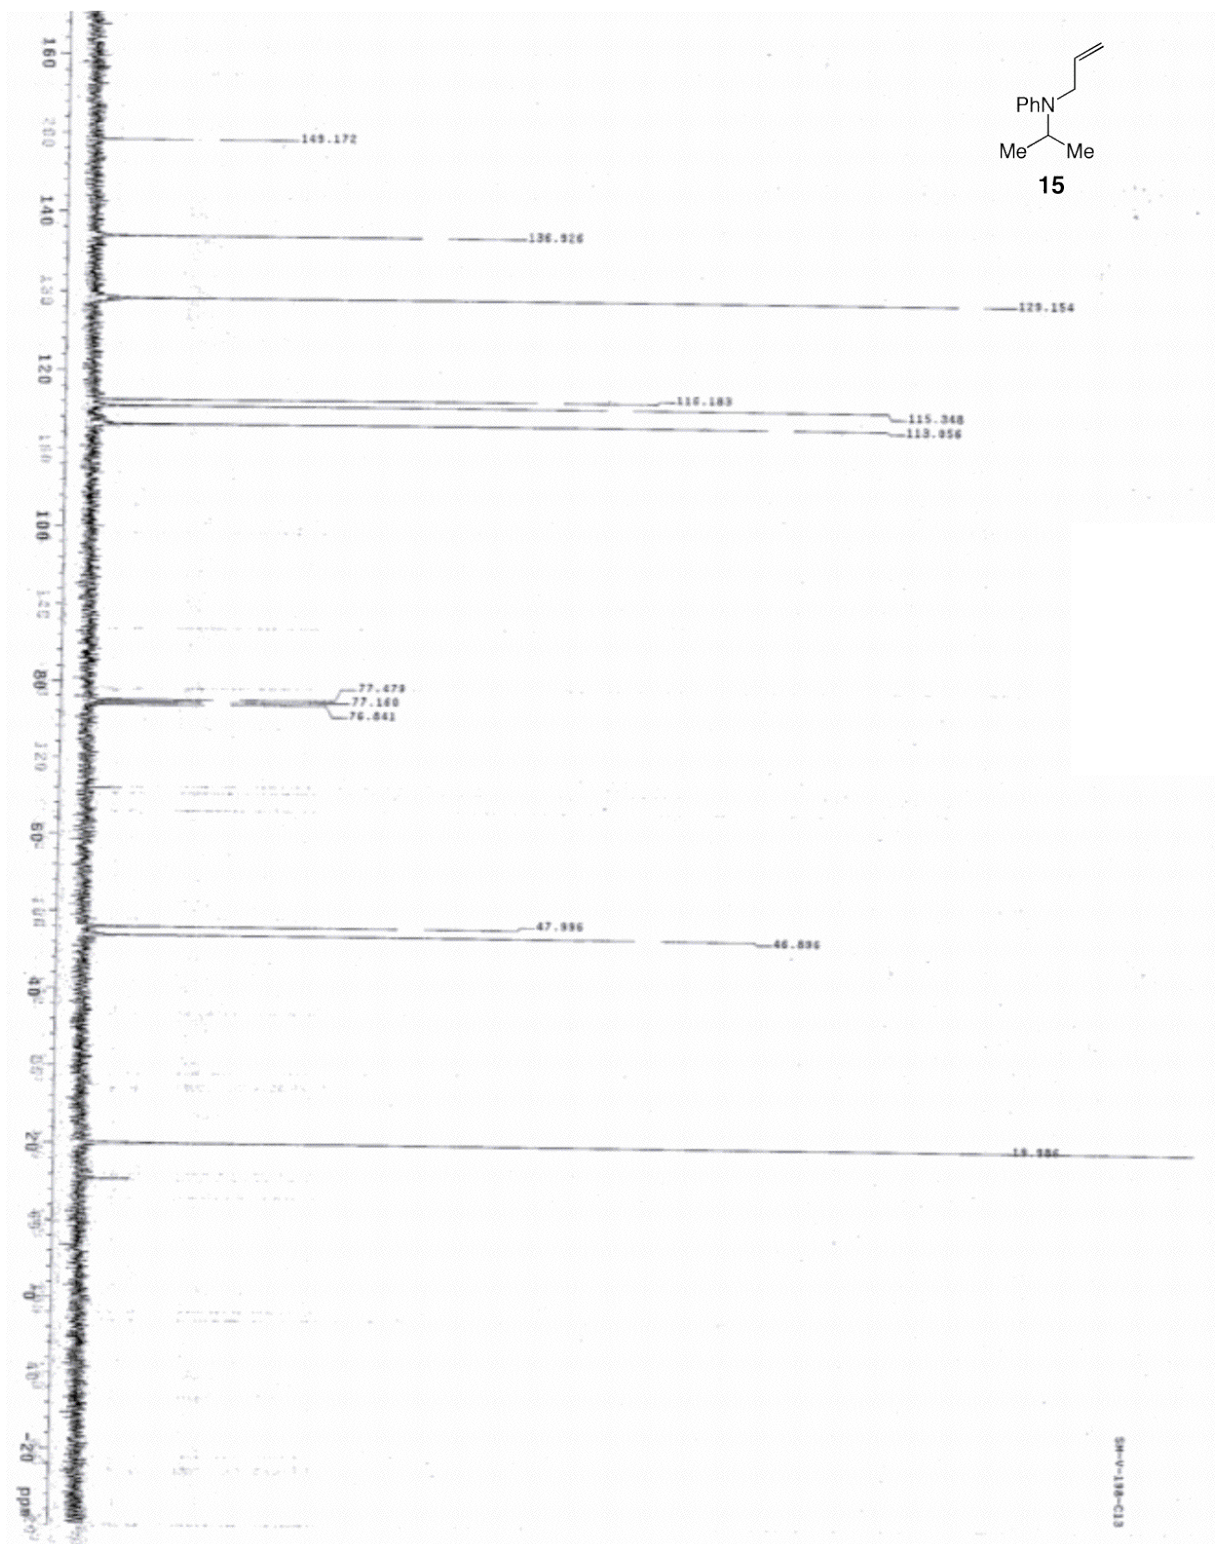

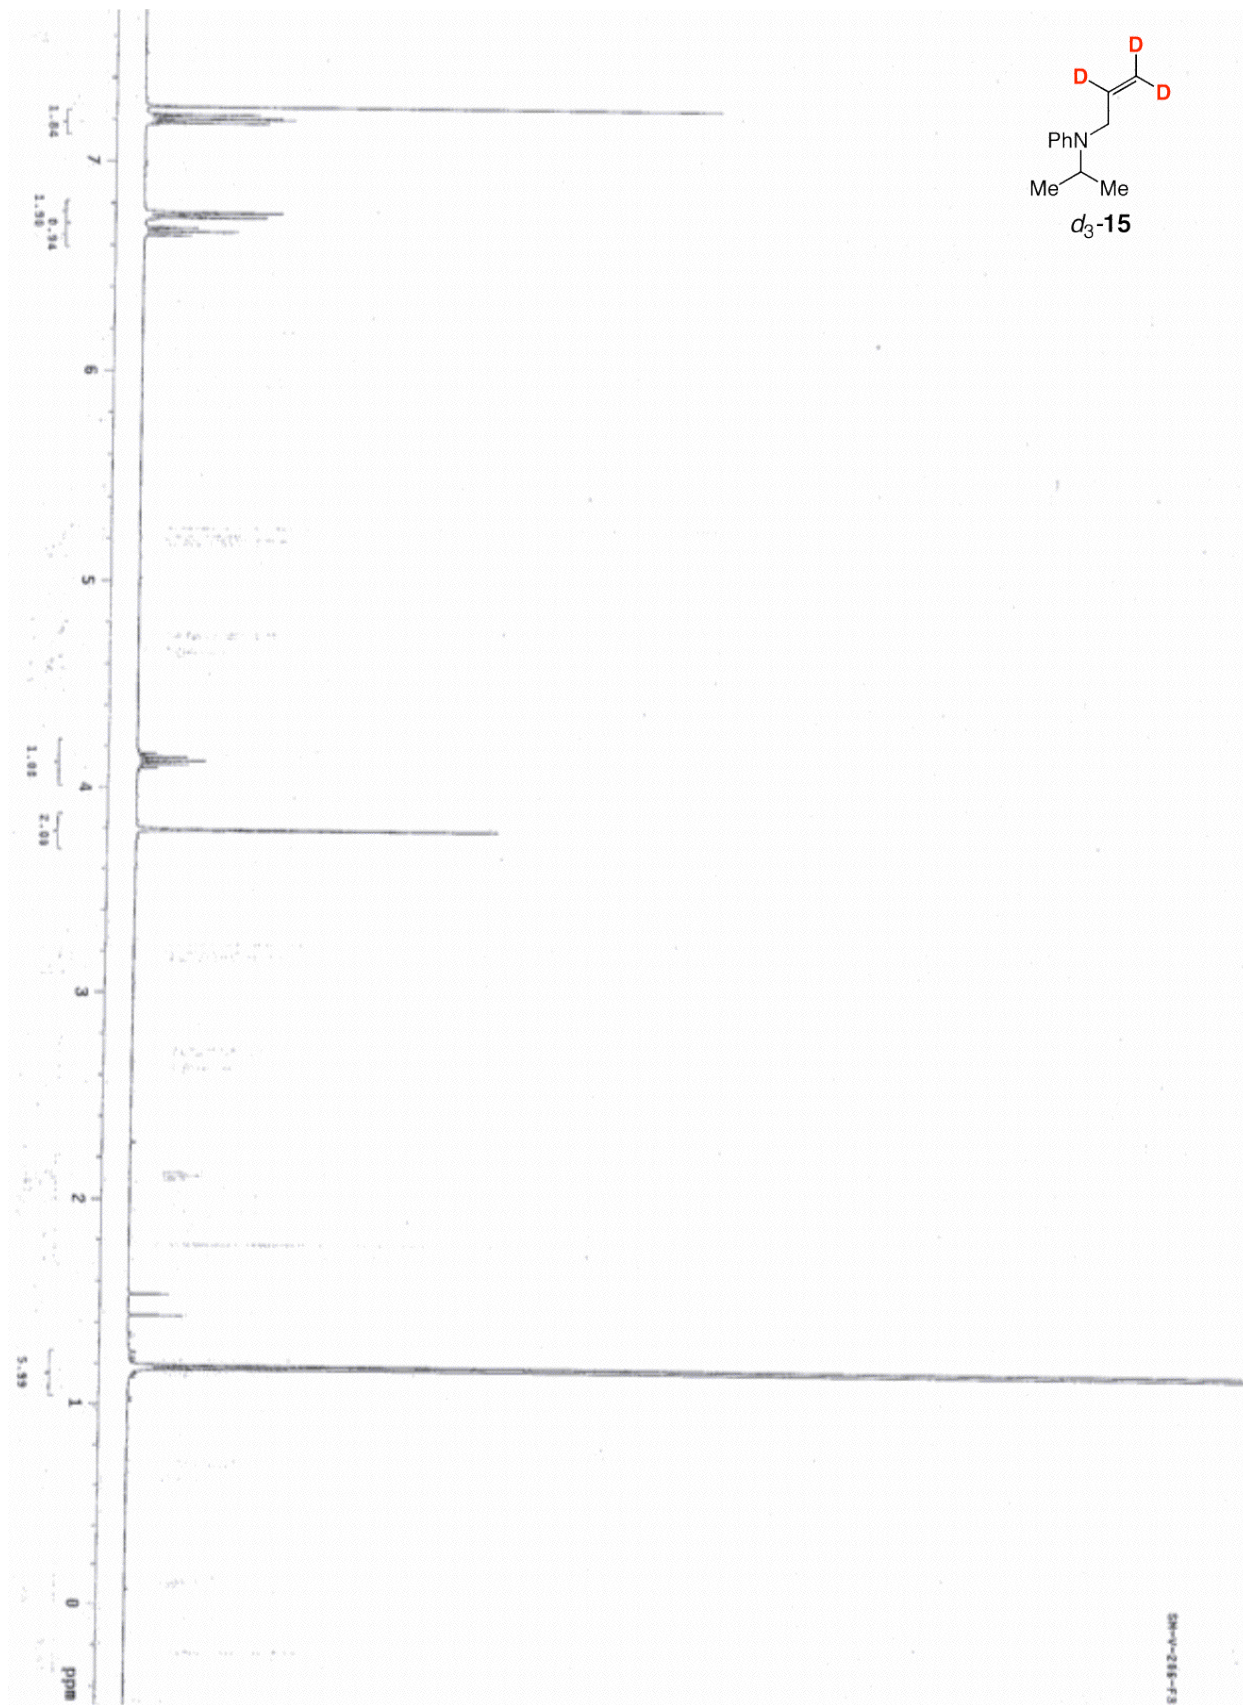

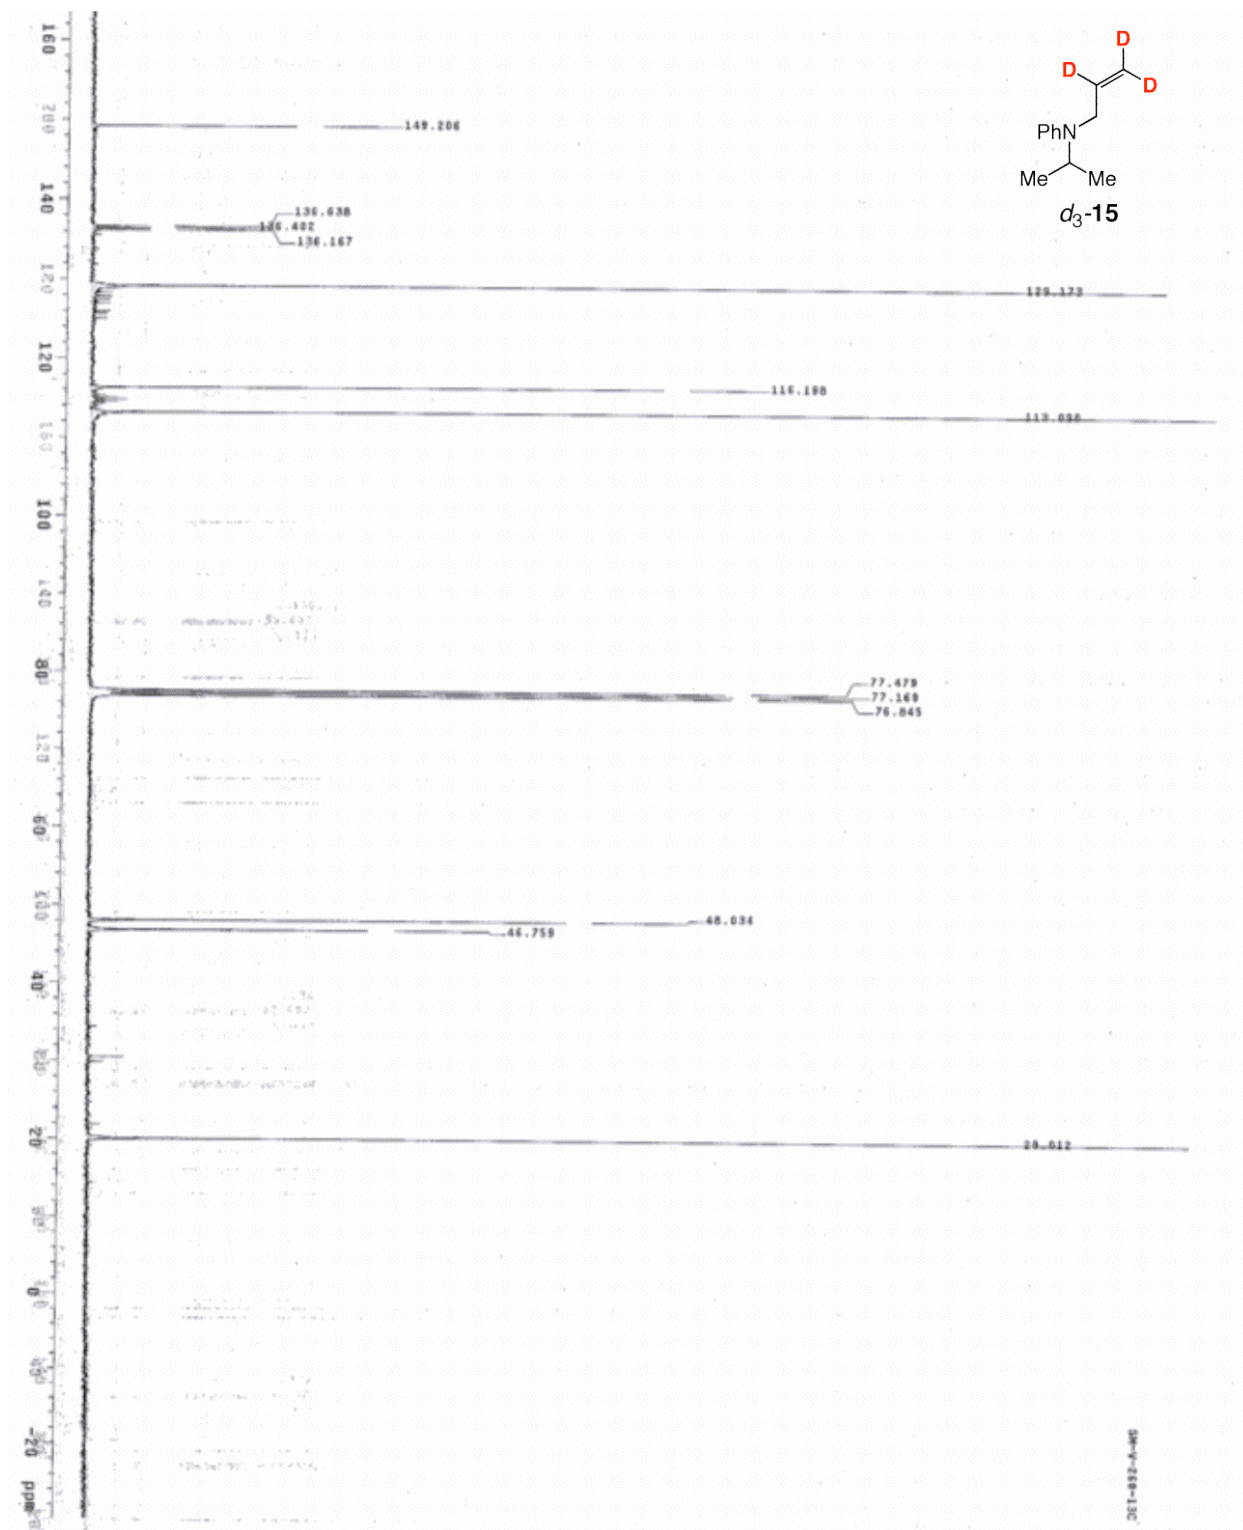



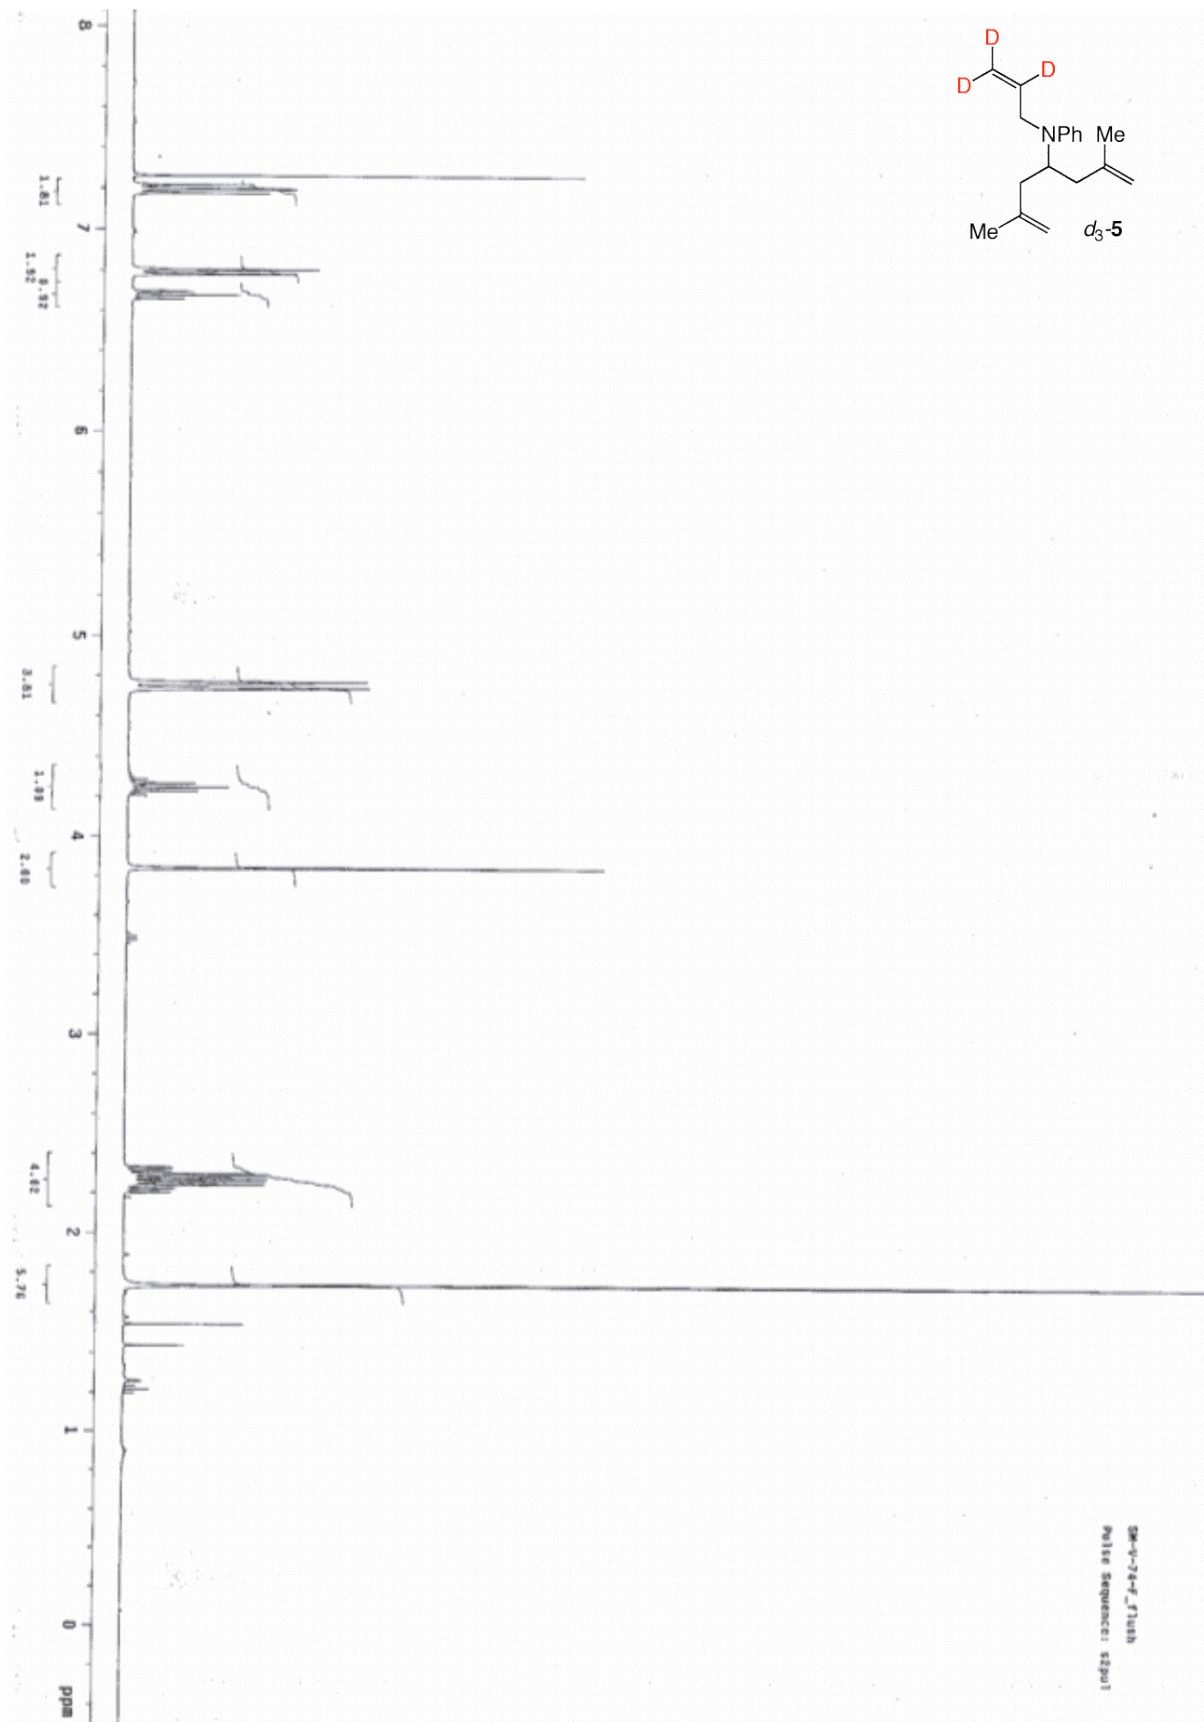

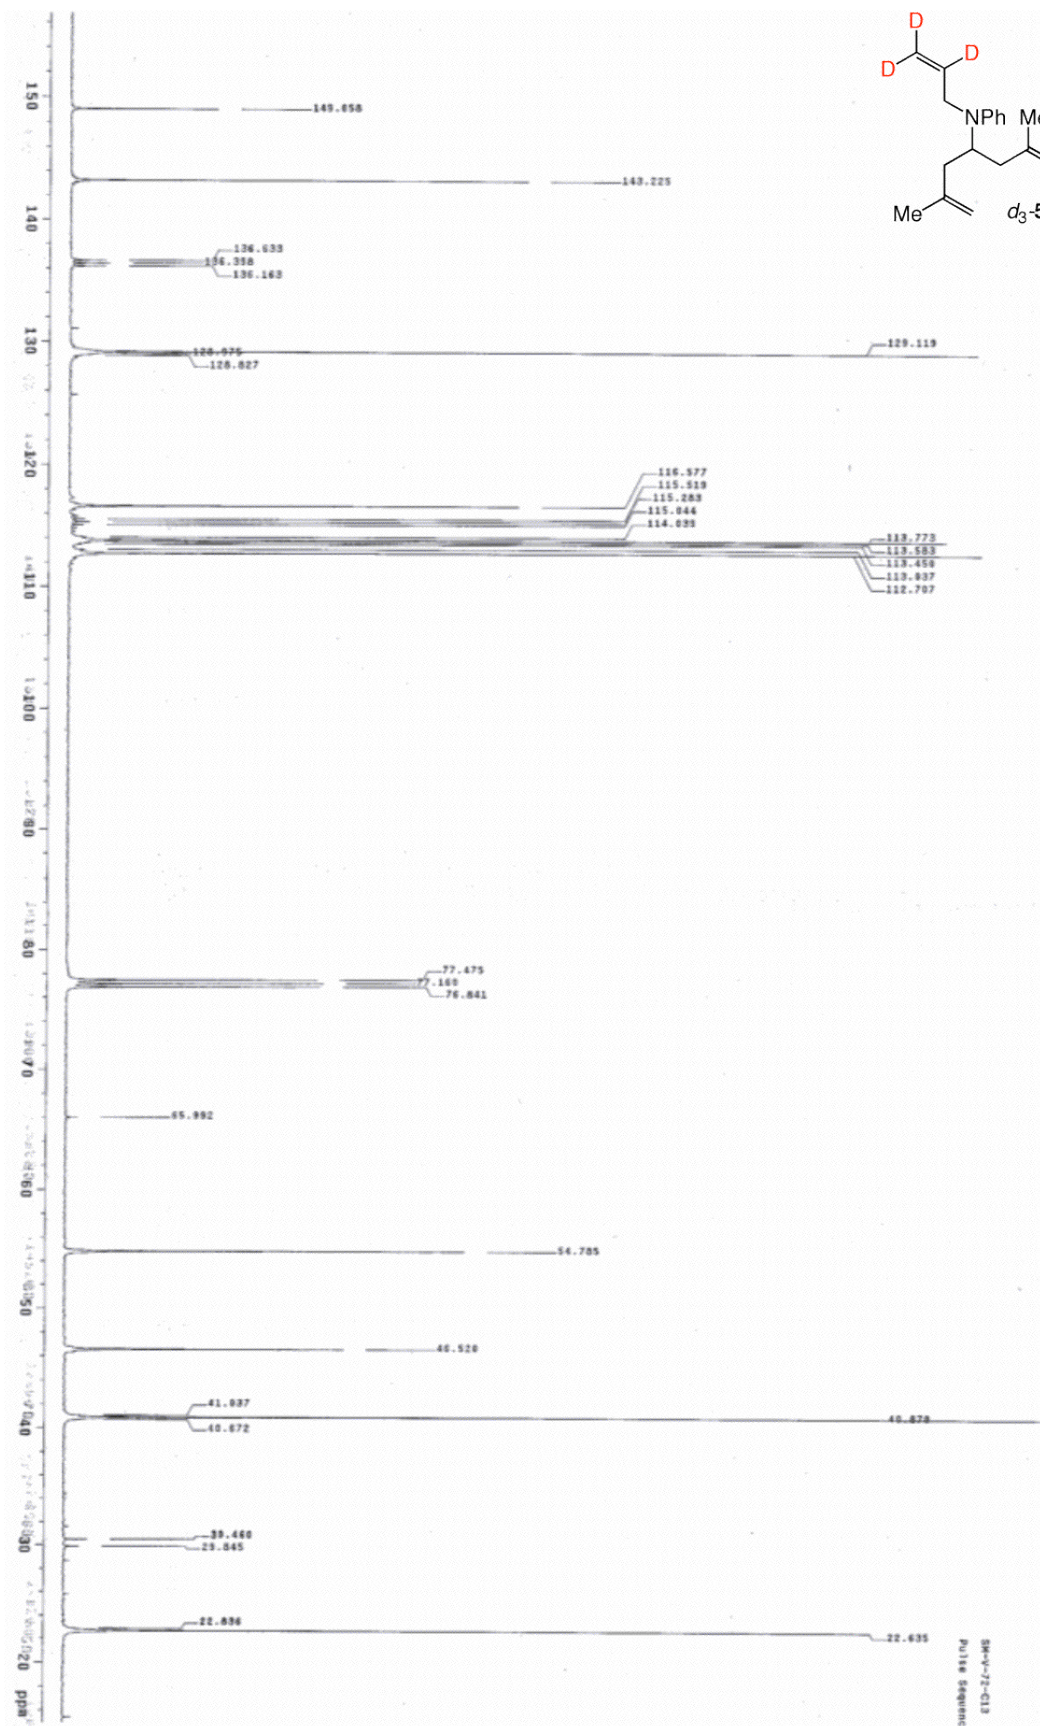

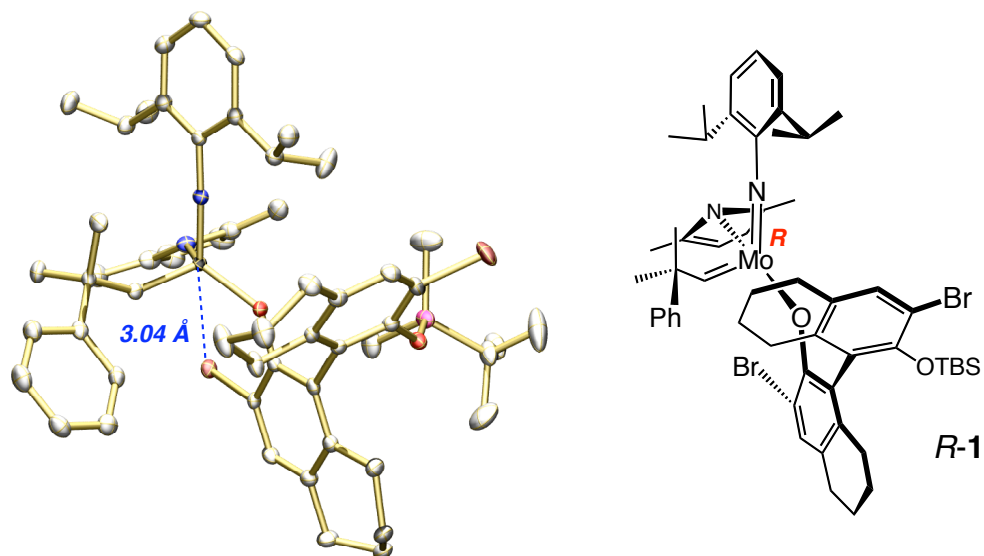

**Figure 1.** X-ray Crystal Structure of *R*-1

**Table 3.** Crystal data and structure refinement for *R*-1

|                                 |                                          |                                |
|---------------------------------|------------------------------------------|--------------------------------|
| Identification code             | C59H82Br2MoN2O2Si                        |                                |
| Empirical formula               | C59 H82 Br2 Mo N2 O2 Si                  |                                |
| Formula weight                  | 1135.12                                  |                                |
| Temperature                     | 100(2) K                                 |                                |
| Wavelength                      | 0.71073 Å                                |                                |
| Crystal system                  | Monoclinic                               |                                |
| Space group                     | P 21                                     |                                |
| Unit cell dimensions            | a = 11.1036(9) Å                         | $\alpha = 90^\circ$ .          |
|                                 | b = 12.5845(11) Å                        | $\beta = 100.5680(10)^\circ$ . |
|                                 | c = 20.5049(17) Å                        | $\gamma = 90^\circ$ .          |
| Volume                          | 2816.6(4) Å <sup>3</sup>                 |                                |
| Z                               | 2                                        |                                |
| Density (calculated)            | 1.338 Mg/m <sup>3</sup>                  |                                |
| Absorption coefficient          | 1.714 mm <sup>-1</sup>                   |                                |
| F(000)                          | 1184                                     |                                |
| Crystal size                    | 0.25 x 0.15 x 0.03 mm <sup>3</sup>       |                                |
| Theta range for data collection | 1.95 to 28.00°.                          |                                |
| Index ranges                    | -14 ≤ h ≤ 14, -16 ≤ k ≤ 16, -26 ≤ l ≤ 26 |                                |
| Reflections collected           | 33266                                    |                                |
| Independent reflections         | 13252 [R(int) = 0.0232]                  |                                |
| Completeness to theta = 28.00°  | 99.4 %                                   |                                |
| Absorption correction           | Semi-empirical from equivalents          |                                |
| Max. and min. transmission      | 0.9504 and 0.6738                        |                                |

|                                   |                                             |
|-----------------------------------|---------------------------------------------|
| Refinement method                 | Full-matrix least-squares on F <sup>2</sup> |
| Data / restraints / parameters    | 13252 / 597 / 611                           |
| Goodness-of-fit on F <sup>2</sup> | 0.941                                       |
| Final R indices [I>2sigma(I)]     | R1 = 0.0237, wR2 = 0.0531                   |
| R indices (all data)              | R1 = 0.0257, wR2 = 0.0535                   |
| Absolute structure parameter      | 0.007(3)                                    |
| Extinction coefficient            | na                                          |
| Largest diff. peak and hole       | 0.773 and -0.251 e.Å <sup>-3</sup>          |

**Table 4.** Atomic coordinates ( $\times 10^4$ ) and equivalent isotropic displacement parameters ( $\approx 2 \times 10^3$ ) for *R*-1.  $U(\text{eq})$  is defined as one third of the trace of the orthogonalized  $U_{ij}$  tensor

|       | x        | y       | z       | $U(\text{eq})$ |
|-------|----------|---------|---------|----------------|
| Mo(1) | 5819(1)  | 1994(1) | 2571(1) | 14(1)          |
| Br(1) | 6598(1)  | 2989(1) | 1363(1) | 20(1)          |
| Br(2) | -613(1)  | 4193(1) | 2195(1) | 33(1)          |
| Si(1) | 1326(1)  | 3586(1) | 886(1)  | 25(1)          |
| O(1)  | 4731(1)  | 3196(1) | 2257(1) | 17(1)          |
| O(2)  | 1508(1)  | 4535(1) | 1459(1) | 21(1)          |
| C(1)  | 4809(2)  | 4097(2) | 1907(1) | 16(1)          |
| C(2)  | 5622(2)  | 4194(2) | 1466(1) | 17(1)          |
| C(3)  | 5647(2)  | 5070(2) | 1070(1) | 21(1)          |
| C(4)  | 4849(2)  | 5910(2) | 1100(1) | 21(1)          |
| C(5)  | 4879(2)  | 6856(2) | 642(1)  | 28(1)          |
| C(6)  | 3694(2)  | 7496(2) | 558(1)  | 27(1)          |
| C(7)  | 3405(2)  | 7757(2) | 1236(1) | 26(1)          |
| C(8)  | 3144(2)  | 6747(2) | 1601(1) | 24(1)          |
| C(9)  | 4036(2)  | 5850(2) | 1548(1) | 19(1)          |
| C(10) | 4007(2)  | 4945(2) | 1942(1) | 16(1)          |
| C(11) | 3092(2)  | 4862(2) | 2397(1) | 16(1)          |
| C(12) | 1879(2)  | 4612(2) | 2130(1) | 19(1)          |
| C(13) | 1033(2)  | 4549(2) | 2551(1) | 21(1)          |
| C(14) | 1369(2)  | 4760(2) | 3220(1) | 22(1)          |
| C(15) | 2567(2)  | 5039(2) | 3490(1) | 20(1)          |
| C(16) | 2894(2)  | 5322(2) | 4222(1) | 26(1)          |
| C(17) | 4059(2)  | 5962(2) | 4388(1) | 34(1)          |
| C(18) | 5056(2)  | 5455(2) | 4092(1) | 36(1)          |
| C(19) | 4743(2)  | 5401(2) | 3345(1) | 26(1)          |
| C(20) | 3436(2)  | 5076(2) | 3078(1) | 17(1)          |
| C(21) | 777(3)   | 2341(2) | 1220(1) | 48(1)          |
| C(22) | 2792(2)  | 3300(2) | 604(1)  | 36(1)          |
| C(23) | 213(2)   | 4213(2) | 189(1)  | 34(1)          |
| C(24) | -1063(2) | 4355(4) | 358(1)  | 66(1)          |
| C(25) | 106(2)   | 3536(2) | -433(1) | 42(1)          |
| C(26) | 728(3)   | 5313(2) | 59(1)   | 54(1)          |
| N(1)  | 5240(1)  | 1302(1) | 3169(1) | 16(1)          |
| C(27) | 4828(2)  | 577(2)  | 3597(1) | 17(1)          |
| C(28) | 3794(2)  | 848(2)  | 3877(1) | 18(1)          |

|        |          |          |         |       |
|--------|----------|----------|---------|-------|
| C(29)  | 3361(2)  | 97(2)    | 4269(1) | 24(1) |
| C(30)  | 3932(2)  | -883(2)  | 4397(1) | 26(1) |
| C(31)  | 4968(2)  | -1114(2) | 4134(1) | 26(1) |
| C(32)  | 5439(2)  | -398(2)  | 3732(1) | 21(1) |
| C(33)  | 3158(2)  | 1901(2)  | 3719(1) | 22(1) |
| C(34)  | 2587(2)  | 2323(2)  | 4290(1) | 28(1) |
| C(35)  | 2208(2)  | 1819(2)  | 3081(1) | 37(1) |
| C(36)  | 6562(2)  | -702(2)  | 3443(1) | 23(1) |
| C(37)  | 6218(2)  | -1491(2) | 2877(1) | 34(1) |
| C(38)  | 7597(2)  | -1141(2) | 3972(1) | 31(1) |
| N(2)   | 6276(2)  | 781(1)   | 2004(1) | 21(1) |
| C(39)  | 7352(2)  | 480(2)   | 1789(1) | 28(1) |
| C(40)  | 7041(3)  | -45(2)   | 1205(1) | 40(1) |
| C(41)  | 5732(3)  | -80(2)   | 1034(1) | 37(1) |
| C(42)  | 5294(2)  | 410(2)   | 1529(1) | 26(1) |
| C(43)  | 8592(2)  | 701(2)   | 2180(1) | 34(1) |
| C(44)  | 3988(2)  | 568(2)   | 1609(1) | 31(1) |
| C(45)  | 7280(2)  | 2505(2)  | 3086(1) | 17(1) |
| C(46)  | 7994(2)  | 2597(2)  | 3796(1) | 18(1) |
| C(47)  | 7276(2)  | 2135(2)  | 4294(1) | 23(1) |
| C(48)  | 9179(2)  | 1943(2)  | 3818(1) | 25(1) |
| C(49)  | 8327(2)  | 3756(2)  | 3978(1) | 19(1) |
| C(50)  | 9121(2)  | 3986(2)  | 4573(1) | 26(1) |
| C(51)  | 9444(2)  | 5017(2)  | 4755(1) | 31(1) |
| C(52)  | 8976(2)  | 5855(2)  | 4351(1) | 28(1) |
| C(53)  | 8181(2)  | 5649(2)  | 3767(1) | 26(1) |
| C(54)  | 7861(2)  | 4605(2)  | 3583(1) | 21(1) |
| C(55)  | -1643(3) | 7031(3)  | 1695(2) | 62(1) |
| C(56)  | -294(3)  | 7225(2)  | 1986(2) | 53(1) |
| C(57)  | -100(3)  | 7583(3)  | 2691(2) | 61(1) |
| C(58)  | 1238(4)  | 7814(3)  | 2999(2) | 57(1) |
| C(59)  | 1852(3)  | 8744(3)  | 2696(2) | 42(1) |
| C(58X) | 1241(3)  | 7813(3)  | 2996(2) | 57(1) |
| C(59X) | 1128(3)  | 7920(3)  | 3675(2) | 58(4) |

---

**Table 5.** Bond lengths [ $\text{\AA}$ ] and angles [ $^\circ$ ] for *R*-1

---

|             |            |
|-------------|------------|
| Mo(1)-N(1)  | 1.7220(16) |
| Mo(1)-C(45) | 1.8791(19) |
| Mo(1)-O(1)  | 1.9692(13) |
| Mo(1)-N(2)  | 2.0386(17) |
| Br(1)-C(2)  | 1.8985(19) |
| Br(2)-C(13) | 1.8930(19) |
| Si(1)-O(2)  | 1.6611(15) |
| Si(1)-C(21) | 1.856(3)   |
| Si(1)-C(22) | 1.860(2)   |
| Si(1)-C(23) | 1.883(2)   |
| O(1)-C(1)   | 1.352(2)   |
| O(2)-C(12)  | 1.365(2)   |
| C(1)-C(2)   | 1.397(2)   |
| C(1)-C(10)  | 1.400(3)   |
| C(2)-C(3)   | 1.372(3)   |
| C(3)-C(4)   | 1.387(3)   |
| C(3)-H(3A)  | 0.9500     |
| C(4)-C(9)   | 1.403(3)   |
| C(4)-C(5)   | 1.521(3)   |
| C(5)-C(6)   | 1.525(3)   |
| C(5)-H(5A)  | 0.9900     |
| C(5)-H(5B)  | 0.9900     |
| C(6)-C(7)   | 1.517(3)   |
| C(6)-H(6A)  | 0.9900     |
| C(6)-H(6B)  | 0.9900     |
| C(7)-C(8)   | 1.529(3)   |
| C(7)-H(7A)  | 0.9900     |
| C(7)-H(7B)  | 0.9900     |
| C(8)-C(9)   | 1.518(3)   |
| C(8)-H(8A)  | 0.9900     |
| C(8)-H(8B)  | 0.9900     |
| C(9)-C(10)  | 1.401(3)   |
| C(10)-C(11) | 1.503(3)   |
| C(11)-C(12) | 1.394(3)   |
| C(11)-C(20) | 1.405(3)   |
| C(12)-C(13) | 1.391(3)   |
| C(13)-C(14) | 1.379(3)   |
| C(14)-C(15) | 1.389(3)   |

|              |          |
|--------------|----------|
| C(14)-H(14A) | 0.9500   |
| C(15)-C(20)  | 1.395(3) |
| C(15)-C(16)  | 1.521(3) |
| C(16)-C(17)  | 1.508(3) |
| C(16)-H(16A) | 0.9900   |
| C(16)-H(16B) | 0.9900   |
| C(17)-C(18)  | 1.498(3) |
| C(17)-H(17A) | 0.9900   |
| C(17)-H(17B) | 0.9900   |
| C(18)-C(19)  | 1.509(3) |
| C(18)-H(18A) | 0.9900   |
| C(18)-H(18B) | 0.9900   |
| C(19)-C(20)  | 1.510(3) |
| C(19)-H(19A) | 0.9900   |
| C(19)-H(19B) | 0.9900   |
| C(21)-H(21A) | 0.9800   |
| C(21)-H(21B) | 0.9800   |
| C(21)-H(21C) | 0.9800   |
| C(22)-H(22A) | 0.9800   |
| C(22)-H(22B) | 0.9800   |
| C(22)-H(22C) | 0.9800   |
| C(23)-C(25)  | 1.520(4) |
| C(23)-C(24)  | 1.530(3) |
| C(23)-C(26)  | 1.540(4) |
| C(24)-H(24A) | 0.9800   |
| C(24)-H(24B) | 0.9800   |
| C(24)-H(24C) | 0.9800   |
| C(25)-H(25A) | 0.9800   |
| C(25)-H(25B) | 0.9800   |
| C(25)-H(25C) | 0.9800   |
| C(26)-H(26A) | 0.9800   |
| C(26)-H(26B) | 0.9800   |
| C(26)-H(26C) | 0.9800   |
| N(1)-C(27)   | 1.399(2) |
| C(27)-C(32)  | 1.406(3) |
| C(27)-C(28)  | 1.416(3) |
| C(28)-C(29)  | 1.383(3) |
| C(28)-C(33)  | 1.509(3) |
| C(29)-C(30)  | 1.389(3) |
| C(29)-H(29A) | 0.9500   |



|              |          |
|--------------|----------|
| C(30)-C(31)  | 1.389(3) |
| C(30)-H(30A) | 0.9500   |
| C(31)-C(32)  | 1.385(3) |
| C(31)-H(31A) | 0.9500   |
| C(32)-C(36)  | 1.525(3) |
| C(33)-C(34)  | 1.525(3) |
| C(33)-C(35)  | 1.526(3) |
| C(33)-H(33A) | 1.0000   |
| C(34)-H(34A) | 0.9800   |
| C(34)-H(34B) | 0.9800   |
| C(34)-H(34C) | 0.9800   |
| C(35)-H(35A) | 0.9800   |
| C(35)-H(35B) | 0.9800   |
| C(35)-H(35C) | 0.9800   |
| C(36)-C(37)  | 1.521(3) |
| C(36)-C(38)  | 1.531(3) |
| C(36)-H(36A) | 1.0000   |
| C(37)-H(37A) | 0.9800   |
| C(37)-H(37B) | 0.9800   |
| C(37)-H(37C) | 0.9800   |
| C(38)-H(38A) | 0.9800   |
| C(38)-H(38B) | 0.9800   |
| C(38)-H(38C) | 0.9800   |
| N(2)-C(39)   | 1.400(3) |
| N(2)-C(42)   | 1.402(3) |
| C(39)-C(40)  | 1.355(3) |
| C(39)-C(43)  | 1.488(3) |
| C(40)-C(41)  | 1.432(4) |
| C(40)-H(40A) | 0.9500   |
| C(41)-C(42)  | 1.353(3) |
| C(41)-H(41A) | 0.9500   |
| C(42)-C(44)  | 1.502(3) |
| C(43)-H(43A) | 0.9800   |
| C(43)-H(43B) | 0.9800   |
| C(43)-H(43C) | 0.9800   |
| C(44)-H(44A) | 0.9800   |
| C(44)-H(44B) | 0.9800   |
| C(44)-H(44C) | 0.9800   |
| C(45)-C(46)  | 1.528(3) |
| C(45)-H(45A) | 0.9500   |

|               |          |
|---------------|----------|
| C(46)-C(47)   | 1.522(3) |
| C(46)-C(49)   | 1.534(3) |
| C(46)-C(48)   | 1.545(3) |
| C(47)-H(47A)  | 0.9800   |
| C(47)-H(47B)  | 0.9800   |
| C(47)-H(47C)  | 0.9800   |
| C(48)-H(48A)  | 0.9800   |
| C(48)-H(48B)  | 0.9800   |
| C(48)-H(48C)  | 0.9800   |
| C(49)-C(54)   | 1.383(3) |
| C(49)-C(50)   | 1.397(3) |
| C(50)-C(51)   | 1.380(3) |
| C(50)-H(50A)  | 0.9500   |
| C(51)-C(52)   | 1.382(3) |
| C(51)-H(51A)  | 0.9500   |
| C(52)-C(53)   | 1.376(3) |
| C(52)-H(52A)  | 0.9500   |
| C(53)-C(54)   | 1.395(3) |
| C(53)-H(53A)  | 0.9500   |
| C(54)-H(54A)  | 0.9500   |
| C(55)-C(56)   | 1.526(4) |
| C(55)-H(55A)  | 0.9800   |
| C(55)-H(55B)  | 0.9800   |
| C(55)-H(55C)  | 0.9800   |
| C(56)-C(57)   | 1.491(4) |
| C(56)-H(56A)  | 0.9900   |
| C(56)-H(56B)  | 0.9900   |
| C(57)-C(58)   | 1.531(5) |
| C(57)-C(58X)  | 1.533(5) |
| C(57)-H(57A)  | 0.9900   |
| C(57)-H(57B)  | 0.9900   |
| C(58)-C(59)   | 1.540(6) |
| C(58)-H(58A)  | 0.9900   |
| C(58)-H(58B)  | 0.9900   |
| C(59)-H(59A)  | 0.9800   |
| C(59)-H(59B)  | 0.9800   |
| C(59)-H(59C)  | 0.9800   |
| C(58X)-C(59X) | 1.4261   |
| C(58X)-H(58C) | 0.9900   |
| C(58X)-H(58D) | 0.9900   |

|                   |            |
|-------------------|------------|
| C(59X)-H(59D)     | 0.9800     |
| C(59X)-H(59E)     | 0.9800     |
| C(59X)-H(59F)     | 0.9800     |
|                   |            |
| N(1)-Mo(1)-C(45)  | 99.76(8)   |
| N(1)-Mo(1)-O(1)   | 109.54(7)  |
| C(45)-Mo(1)-O(1)  | 109.63(7)  |
| N(1)-Mo(1)-N(2)   | 101.03(7)  |
| C(45)-Mo(1)-N(2)  | 107.31(8)  |
| O(1)-Mo(1)-N(2)   | 126.20(6)  |
| O(2)-Si(1)-C(21)  | 110.62(10) |
| O(2)-Si(1)-C(22)  | 111.02(9)  |
| C(21)-Si(1)-C(22) | 108.46(14) |
| O(2)-Si(1)-C(23)  | 102.32(10) |
| C(21)-Si(1)-C(23) | 114.81(12) |
| C(22)-Si(1)-C(23) | 109.53(11) |
| C(1)-O(1)-Mo(1)   | 136.23(11) |
| C(12)-O(2)-Si(1)  | 137.58(13) |
| O(1)-C(1)-C(2)    | 121.94(17) |
| O(1)-C(1)-C(10)   | 120.60(16) |
| C(2)-C(1)-C(10)   | 117.31(18) |
| C(3)-C(2)-C(1)    | 122.66(18) |
| C(3)-C(2)-Br(1)   | 120.13(14) |
| C(1)-C(2)-Br(1)   | 116.91(15) |
| C(2)-C(3)-C(4)    | 120.21(18) |
| C(2)-C(3)-H(3A)   | 119.9      |
| C(4)-C(3)-H(3A)   | 119.9      |
| C(3)-C(4)-C(9)    | 118.77(19) |
| C(3)-C(4)-C(5)    | 118.86(18) |
| C(9)-C(4)-C(5)    | 122.37(19) |
| C(4)-C(5)-C(6)    | 111.52(17) |
| C(4)-C(5)-H(5A)   | 109.3      |
| C(6)-C(5)-H(5A)   | 109.3      |
| C(4)-C(5)-H(5B)   | 109.3      |
| C(6)-C(5)-H(5B)   | 109.3      |
| H(5A)-C(5)-H(5B)  | 108.0      |
| C(7)-C(6)-C(5)    | 109.52(17) |
| C(7)-C(6)-H(6A)   | 109.8      |
| C(5)-C(6)-H(6A)   | 109.8      |
| C(7)-C(6)-H(6B)   | 109.8      |

|                    |            |
|--------------------|------------|
| C(5)-C(6)-H(6B)    | 109.8      |
| H(6A)-C(6)-H(6B)   | 108.2      |
| C(6)-C(7)-C(8)     | 111.04(18) |
| C(6)-C(7)-H(7A)    | 109.4      |
| C(8)-C(7)-H(7A)    | 109.4      |
| C(6)-C(7)-H(7B)    | 109.4      |
| C(8)-C(7)-H(7B)    | 109.4      |
| H(7A)-C(7)-H(7B)   | 108.0      |
| C(9)-C(8)-C(7)     | 113.46(17) |
| C(9)-C(8)-H(8A)    | 108.9      |
| C(7)-C(8)-H(8A)    | 108.9      |
| C(9)-C(8)-H(8B)    | 108.9      |
| C(7)-C(8)-H(8B)    | 108.9      |
| H(8A)-C(8)-H(8B)   | 107.7      |
| C(10)-C(9)-C(4)    | 120.43(19) |
| C(10)-C(9)-C(8)    | 118.65(17) |
| C(4)-C(9)-C(8)     | 120.89(18) |
| C(1)-C(10)-C(9)    | 120.59(18) |
| C(1)-C(10)-C(11)   | 119.13(17) |
| C(9)-C(10)-C(11)   | 120.27(17) |
| C(12)-C(11)-C(20)  | 120.07(17) |
| C(12)-C(11)-C(10)  | 119.09(17) |
| C(20)-C(11)-C(10)  | 120.78(17) |
| O(2)-C(12)-C(13)   | 120.54(17) |
| O(2)-C(12)-C(11)   | 120.26(17) |
| C(13)-C(12)-C(11)  | 118.88(18) |
| C(14)-C(13)-C(12)  | 121.07(18) |
| C(14)-C(13)-Br(2)  | 119.69(15) |
| C(12)-C(13)-Br(2)  | 119.23(15) |
| C(13)-C(14)-C(15)  | 120.65(18) |
| C(13)-C(14)-H(14A) | 119.7      |
| C(15)-C(14)-H(14A) | 119.7      |
| C(14)-C(15)-C(20)  | 119.06(18) |
| C(14)-C(15)-C(16)  | 119.38(18) |
| C(20)-C(15)-C(16)  | 121.54(18) |
| C(17)-C(16)-C(15)  | 112.80(17) |
| C(17)-C(16)-H(16A) | 109.0      |
| C(15)-C(16)-H(16A) | 109.0      |
| C(17)-C(16)-H(16B) | 109.0      |
| C(15)-C(16)-H(16B) | 109.0      |

|                     |            |
|---------------------|------------|
| H(16A)-C(16)-H(16B) | 107.8      |
| C(18)-C(17)-C(16)   | 110.4(2)   |
| C(18)-C(17)-H(17A)  | 109.6      |
| C(16)-C(17)-H(17A)  | 109.6      |
| C(18)-C(17)-H(17B)  | 109.6      |
| C(16)-C(17)-H(17B)  | 109.6      |
| H(17A)-C(17)-H(17B) | 108.1      |
| C(17)-C(18)-C(19)   | 112.4(2)   |
| C(17)-C(18)-H(18A)  | 109.1      |
| C(19)-C(18)-H(18A)  | 109.1      |
| C(17)-C(18)-H(18B)  | 109.1      |
| C(19)-C(18)-H(18B)  | 109.1      |
| H(18A)-C(18)-H(18B) | 107.9      |
| C(18)-C(19)-C(20)   | 114.00(18) |
| C(18)-C(19)-H(19A)  | 108.8      |
| C(20)-C(19)-H(19A)  | 108.8      |
| C(18)-C(19)-H(19B)  | 108.8      |
| C(20)-C(19)-H(19B)  | 108.8      |
| H(19A)-C(19)-H(19B) | 107.6      |
| C(15)-C(20)-C(11)   | 120.21(18) |
| C(15)-C(20)-C(19)   | 121.04(18) |
| C(11)-C(20)-C(19)   | 118.66(17) |
| Si(1)-C(21)-H(21A)  | 109.5      |
| Si(1)-C(21)-H(21B)  | 109.5      |
| H(21A)-C(21)-H(21B) | 109.5      |
| Si(1)-C(21)-H(21C)  | 109.5      |
| H(21A)-C(21)-H(21C) | 109.5      |
| H(21B)-C(21)-H(21C) | 109.5      |
| Si(1)-C(22)-H(22A)  | 109.5      |
| Si(1)-C(22)-H(22B)  | 109.5      |
| H(22A)-C(22)-H(22B) | 109.5      |
| Si(1)-C(22)-H(22C)  | 109.5      |
| H(22A)-C(22)-H(22C) | 109.5      |
| H(22B)-C(22)-H(22C) | 109.5      |
| C(25)-C(23)-C(24)   | 108.8(2)   |
| C(25)-C(23)-C(26)   | 109.4(2)   |
| C(24)-C(23)-C(26)   | 108.8(3)   |
| C(25)-C(23)-Si(1)   | 109.99(18) |
| C(24)-C(23)-Si(1)   | 112.48(17) |
| C(26)-C(23)-Si(1)   | 107.21(16) |

|                     |            |
|---------------------|------------|
| C(23)-C(24)-H(24A)  | 109.5      |
| C(23)-C(24)-H(24B)  | 109.5      |
| H(24A)-C(24)-H(24B) | 109.5      |
| C(23)-C(24)-H(24C)  | 109.5      |
| H(24A)-C(24)-H(24C) | 109.5      |
| H(24B)-C(24)-H(24C) | 109.5      |
| C(23)-C(25)-H(25A)  | 109.5      |
| C(23)-C(25)-H(25B)  | 109.5      |
| H(25A)-C(25)-H(25B) | 109.5      |
| C(23)-C(25)-H(25C)  | 109.5      |
| H(25A)-C(25)-H(25C) | 109.5      |
| H(25B)-C(25)-H(25C) | 109.5      |
| C(23)-C(26)-H(26A)  | 109.5      |
| C(23)-C(26)-H(26B)  | 109.5      |
| H(26A)-C(26)-H(26B) | 109.5      |
| C(23)-C(26)-H(26C)  | 109.5      |
| H(26A)-C(26)-H(26C) | 109.5      |
| H(26B)-C(26)-H(26C) | 109.5      |
| C(27)-N(1)-Mo(1)    | 169.74(14) |
| N(1)-C(27)-C(32)    | 119.48(17) |
| N(1)-C(27)-C(28)    | 118.69(17) |
| C(32)-C(27)-C(28)   | 121.83(18) |
| C(29)-C(28)-C(27)   | 117.76(19) |
| C(29)-C(28)-C(33)   | 121.73(18) |
| C(27)-C(28)-C(33)   | 120.44(17) |
| C(28)-C(29)-C(30)   | 121.38(19) |
| C(28)-C(29)-H(29A)  | 119.3      |
| C(30)-C(29)-H(29A)  | 119.3      |
| C(29)-C(30)-C(31)   | 119.6(2)   |
| C(29)-C(30)-H(30A)  | 120.2      |
| C(31)-C(30)-H(30A)  | 120.2      |
| C(32)-C(31)-C(30)   | 121.7(2)   |
| C(32)-C(31)-H(31A)  | 119.2      |
| C(30)-C(31)-H(31A)  | 119.2      |
| C(31)-C(32)-C(27)   | 117.68(19) |
| C(31)-C(32)-C(36)   | 119.52(19) |
| C(27)-C(32)-C(36)   | 122.78(18) |
| C(28)-C(33)-C(34)   | 112.67(17) |
| C(28)-C(33)-C(35)   | 110.27(18) |
| C(34)-C(33)-C(35)   | 111.27(17) |

|                     |            |
|---------------------|------------|
| C(28)-C(33)-H(33A)  | 107.5      |
| C(34)-C(33)-H(33A)  | 107.5      |
| C(35)-C(33)-H(33A)  | 107.5      |
| C(33)-C(34)-H(34A)  | 109.5      |
| C(33)-C(34)-H(34B)  | 109.5      |
| H(34A)-C(34)-H(34B) | 109.5      |
| C(33)-C(34)-H(34C)  | 109.5      |
| H(34A)-C(34)-H(34C) | 109.5      |
| H(34B)-C(34)-H(34C) | 109.5      |
| C(33)-C(35)-H(35A)  | 109.5      |
| C(33)-C(35)-H(35B)  | 109.5      |
| H(35A)-C(35)-H(35B) | 109.5      |
| C(33)-C(35)-H(35C)  | 109.5      |
| H(35A)-C(35)-H(35C) | 109.5      |
| H(35B)-C(35)-H(35C) | 109.5      |
| C(37)-C(36)-C(32)   | 110.60(18) |
| C(37)-C(36)-C(38)   | 110.81(19) |
| C(32)-C(36)-C(38)   | 112.10(17) |
| C(37)-C(36)-H(36A)  | 107.7      |
| C(32)-C(36)-H(36A)  | 107.7      |
| C(38)-C(36)-H(36A)  | 107.7      |
| C(36)-C(37)-H(37A)  | 109.5      |
| C(36)-C(37)-H(37B)  | 109.5      |
| H(37A)-C(37)-H(37B) | 109.5      |
| C(36)-C(37)-H(37C)  | 109.5      |
| H(37A)-C(37)-H(37C) | 109.5      |
| H(37B)-C(37)-H(37C) | 109.5      |
| C(36)-C(38)-H(38A)  | 109.5      |
| C(36)-C(38)-H(38B)  | 109.5      |
| H(38A)-C(38)-H(38B) | 109.5      |
| C(36)-C(38)-H(38C)  | 109.5      |
| H(38A)-C(38)-H(38C) | 109.5      |
| H(38B)-C(38)-H(38C) | 109.5      |
| C(39)-N(2)-C(42)    | 106.89(17) |
| C(39)-N(2)-Mo(1)    | 134.33(15) |
| C(42)-N(2)-Mo(1)    | 113.73(13) |
| C(40)-C(39)-N(2)    | 108.5(2)   |
| C(40)-C(39)-C(43)   | 128.9(2)   |
| N(2)-C(39)-C(43)    | 122.62(19) |
| C(39)-C(40)-C(41)   | 108.3(2)   |

|                     |            |
|---------------------|------------|
| C(39)-C(40)-H(40A)  | 125.8      |
| C(41)-C(40)-H(40A)  | 125.8      |
| C(42)-C(41)-C(40)   | 106.9(2)   |
| C(42)-C(41)-H(41A)  | 126.6      |
| C(40)-C(41)-H(41A)  | 126.6      |
| C(41)-C(42)-N(2)    | 109.4(2)   |
| C(41)-C(42)-C(44)   | 129.0(2)   |
| N(2)-C(42)-C(44)    | 121.59(18) |
| C(39)-C(43)-H(43A)  | 109.5      |
| C(39)-C(43)-H(43B)  | 109.5      |
| H(43A)-C(43)-H(43B) | 109.5      |
| C(39)-C(43)-H(43C)  | 109.5      |
| H(43A)-C(43)-H(43C) | 109.5      |
| H(43B)-C(43)-H(43C) | 109.5      |
| C(42)-C(44)-H(44A)  | 109.5      |
| C(42)-C(44)-H(44B)  | 109.5      |
| H(44A)-C(44)-H(44B) | 109.5      |
| C(42)-C(44)-H(44C)  | 109.5      |
| H(44A)-C(44)-H(44C) | 109.5      |
| H(44B)-C(44)-H(44C) | 109.5      |
| C(46)-C(45)-Mo(1)   | 143.60(15) |
| C(46)-C(45)-H(45A)  | 108.2      |
| Mo(1)-C(45)-H(45A)  | 108.2      |
| C(47)-C(46)-C(45)   | 111.45(16) |
| C(47)-C(46)-C(49)   | 109.37(17) |
| C(45)-C(46)-C(49)   | 111.32(16) |
| C(47)-C(46)-C(48)   | 108.97(17) |
| C(45)-C(46)-C(48)   | 106.18(16) |
| C(49)-C(46)-C(48)   | 109.47(17) |
| C(46)-C(47)-H(47A)  | 109.5      |
| C(46)-C(47)-H(47B)  | 109.5      |
| H(47A)-C(47)-H(47B) | 109.5      |
| C(46)-C(47)-H(47C)  | 109.5      |
| H(47A)-C(47)-H(47C) | 109.5      |
| H(47B)-C(47)-H(47C) | 109.5      |
| C(46)-C(48)-H(48A)  | 109.5      |
| C(46)-C(48)-H(48B)  | 109.5      |
| H(48A)-C(48)-H(48B) | 109.5      |
| C(46)-C(48)-H(48C)  | 109.5      |
| H(48A)-C(48)-H(48C) | 109.5      |



|                     |            |
|---------------------|------------|
| H(48B)-C(48)-H(48C) | 109.5      |
| C(54)-C(49)-C(50)   | 117.4(2)   |
| C(54)-C(49)-C(46)   | 122.98(17) |
| C(50)-C(49)-C(46)   | 119.63(18) |
| C(51)-C(50)-C(49)   | 121.5(2)   |
| C(51)-C(50)-H(50A)  | 119.3      |
| C(49)-C(50)-H(50A)  | 119.3      |
| C(50)-C(51)-C(52)   | 120.3(2)   |
| C(50)-C(51)-H(51A)  | 119.8      |
| C(52)-C(51)-H(51A)  | 119.8      |
| C(53)-C(52)-C(51)   | 119.2(2)   |
| C(53)-C(52)-H(52A)  | 120.4      |
| C(51)-C(52)-H(52A)  | 120.4      |
| C(52)-C(53)-C(54)   | 120.3(2)   |
| C(52)-C(53)-H(53A)  | 119.9      |
| C(54)-C(53)-H(53A)  | 119.9      |
| C(49)-C(54)-C(53)   | 121.33(19) |
| C(49)-C(54)-H(54A)  | 119.3      |
| C(53)-C(54)-H(54A)  | 119.3      |
| C(56)-C(55)-H(55A)  | 109.5      |
| C(56)-C(55)-H(55B)  | 109.5      |
| H(55A)-C(55)-H(55B) | 109.5      |
| C(56)-C(55)-H(55C)  | 109.5      |
| H(55A)-C(55)-H(55C) | 109.5      |
| H(55B)-C(55)-H(55C) | 109.5      |
| C(57)-C(56)-C(55)   | 112.6(3)   |
| C(57)-C(56)-H(56A)  | 109.1      |
| C(55)-C(56)-H(56A)  | 109.1      |
| C(57)-C(56)-H(56B)  | 109.1      |
| C(55)-C(56)-H(56B)  | 109.1      |
| H(56A)-C(56)-H(56B) | 107.8      |
| C(56)-C(57)-C(58)   | 114.4(3)   |
| C(56)-C(57)-C(58X)  | 114.2(3)   |
| C(58)-C(57)-C(58X)  | 0.2(2)     |
| C(56)-C(57)-H(57A)  | 108.7      |
| C(58)-C(57)-H(57A)  | 108.7      |
| C(58X)-C(57)-H(57A) | 108.8      |
| C(56)-C(57)-H(57B)  | 108.7      |
| C(58)-C(57)-H(57B)  | 108.7      |
| C(58X)-C(57)-H(57B) | 108.7      |

|                      |           |
|----------------------|-----------|
| H(57A)-C(57)-H(57B)  | 107.6     |
| C(57)-C(58)-C(59)    | 116.5(3)  |
| C(57)-C(58)-H(58A)   | 108.2     |
| C(59)-C(58)-H(58A)   | 108.2     |
| C(57)-C(58)-H(58B)   | 108.2     |
| C(59)-C(58)-H(58B)   | 108.2     |
| H(58A)-C(58)-H(58B)  | 107.3     |
| C(58)-C(59)-H(59A)   | 109.5     |
| C(58)-C(59)-H(59B)   | 109.5     |
| H(59A)-C(59)-H(59B)  | 109.5     |
| C(58)-C(59)-H(59C)   | 109.5     |
| H(59A)-C(59)-H(59C)  | 109.5     |
| H(59B)-C(59)-H(59C)  | 109.5     |
| C(59X)-C(58X)-C(57)  | 99.42(17) |
| C(59X)-C(58X)-H(58C) | 111.9     |
| C(57)-C(58X)-H(58C)  | 111.9     |
| C(59X)-C(58X)-H(58D) | 111.9     |
| C(57)-C(58X)-H(58D)  | 111.9     |
| H(58C)-C(58X)-H(58D) | 109.6     |
| C(58X)-C(59X)-H(59D) | 109.5     |
| C(58X)-C(59X)-H(59E) | 109.5     |
| H(59D)-C(59X)-H(59E) | 109.5     |
| C(58X)-C(59X)-H(59F) | 109.5     |
| H(59D)-C(59X)-H(59F) | 109.5     |
| H(59E)-C(59X)-H(59F) | 109.5     |

---

Symmetry transformations used to generate equivalent atoms:

**Table 6.** Anisotropic displacement parameters ( $\approx 2 \times 10^3$ ) for *R*-1. The anisotropic displacement factor exponent takes the form:  $-2\pi^2 [ h^2 a^{*2} U^{11} + \dots + 2 h k a^* b^* U^{12} ]$

|       | U <sup>11</sup> | U <sup>22</sup> | U <sup>33</sup> | U <sup>23</sup> | U <sup>13</sup> | U <sup>12</sup> |
|-------|-----------------|-----------------|-----------------|-----------------|-----------------|-----------------|
| Mo(1) | 14(1)           | 14(1)           | 16(1)           | 1(1)            | 4(1)            | 0(1)            |
| Br(1) | 18(1)           | 23(1)           | 20(1)           | 0(1)            | 6(1)            | 2(1)            |
| Br(2) | 17(1)           | 52(1)           | 30(1)           | 1(1)            | 5(1)            | -12(1)          |
| Si(1) | 25(1)           | 28(1)           | 18(1)           | 1(1)            | -1(1)           | -7(1)           |
| O(1)  | 15(1)           | 16(1)           | 19(1)           | 3(1)            | 4(1)            | 1(1)            |
| O(2)  | 20(1)           | 25(1)           | 18(1)           | 3(1)            | 2(1)            | -5(1)           |
| C(1)  | 14(1)           | 18(1)           | 16(1)           | 1(1)            | 2(1)            | -2(1)           |
| C(2)  | 14(1)           | 18(1)           | 18(1)           | 0(1)            | 3(1)            | 2(1)            |
| C(3)  | 19(1)           | 27(1)           | 18(1)           | 2(1)            | 6(1)            | -4(1)           |
| C(4)  | 23(1)           | 21(1)           | 19(1)           | 3(1)            | 2(1)            | -4(1)           |
| C(5)  | 32(1)           | 24(1)           | 27(1)           | 7(1)            | 9(1)            | -2(1)           |
| C(6)  | 29(1)           | 22(1)           | 28(1)           | 10(1)           | 0(1)            | -2(1)           |
| C(7)  | 26(1)           | 19(1)           | 31(1)           | 8(1)            | 2(1)            | 2(1)            |
| C(8)  | 24(1)           | 21(1)           | 27(1)           | 5(1)            | 5(1)            | 2(1)            |
| C(9)  | 17(1)           | 19(1)           | 19(1)           | 1(1)            | 1(1)            | -3(1)           |
| C(10) | 13(1)           | 18(1)           | 17(1)           | -2(1)           | 0(1)            | -2(1)           |
| C(11) | 17(1)           | 13(1)           | 19(1)           | 3(1)            | 5(1)            | 1(1)            |
| C(12) | 22(1)           | 16(1)           | 18(1)           | 2(1)            | 2(1)            | -2(1)           |
| C(13) | 14(1)           | 23(1)           | 27(1)           | 3(1)            | 2(1)            | -2(1)           |
| C(14) | 22(1)           | 22(1)           | 23(1)           | 1(1)            | 10(1)           | -1(1)           |
| C(15) | 23(1)           | 16(1)           | 21(1)           | 1(1)            | 6(1)            | 1(1)            |
| C(16) | 28(1)           | 29(1)           | 22(1)           | -3(1)           | 10(1)           | -4(1)           |
| C(17) | 28(1)           | 46(2)           | 26(1)           | -9(1)           | 5(1)            | -1(1)           |
| C(18) | 23(1)           | 60(2)           | 26(1)           | -11(1)          | 3(1)            | -4(1)           |
| C(19) | 17(1)           | 39(1)           | 22(1)           | -5(1)           | 4(1)            | -1(1)           |
| C(20) | 16(1)           | 14(1)           | 21(1)           | 2(1)            | 2(1)            | 1(1)            |
| C(21) | 74(2)           | 37(2)           | 28(1)           | -2(1)           | -1(1)           | -25(1)          |
| C(22) | 31(1)           | 45(2)           | 28(1)           | -13(1)          | -4(1)           | 1(1)            |
| C(23) | 24(1)           | 54(2)           | 20(1)           | 5(1)            | -2(1)           | -1(1)           |
| C(24) | 29(1)           | 136(3)          | 32(2)           | -1(2)           | -1(1)           | 18(2)           |
| C(25) | 33(1)           | 66(2)           | 24(1)           | 2(1)            | -3(1)           | -10(1)          |
| C(26) | 73(2)           | 48(2)           | 36(2)           | 17(1)           | -7(2)           | 8(2)            |
| N(1)  | 17(1)           | 15(1)           | 17(1)           | 0(1)            | 4(1)            | -1(1)           |
| C(27) | 17(1)           | 18(1)           | 17(1)           | 2(1)            | 1(1)            | -3(1)           |
| C(28) | 17(1)           | 19(1)           | 18(1)           | 0(1)            | 1(1)            | -2(1)           |

|        |       |        |       |        |       |        |
|--------|-------|--------|-------|--------|-------|--------|
| C(29)  | 20(1) | 30(1)  | 25(1) | 1(1)   | 7(1)  | -5(1)  |
| C(30)  | 30(1) | 25(1)  | 24(1) | 5(1)   | 8(1)  | -6(1)  |
| C(31)  | 29(1) | 20(1)  | 28(1) | 5(1)   | 4(1)  | 1(1)   |
| C(32)  | 21(1) | 22(1)  | 20(1) | 1(1)   | 2(1)  | -2(1)  |
| C(33)  | 21(1) | 21(1)  | 25(1) | 3(1)   | 6(1)  | 0(1)   |
| C(34)  | 28(1) | 26(1)  | 30(1) | 0(1)   | 7(1)  | 4(1)   |
| C(35)  | 41(1) | 45(2)  | 25(1) | 0(1)   | 2(1)  | 21(1)  |
| C(36)  | 24(1) | 21(1)  | 26(1) | 2(1)   | 6(1)  | 5(1)   |
| C(37)  | 40(1) | 29(1)  | 35(1) | 0(1)   | 11(1) | 6(1)   |
| C(38)  | 27(1) | 34(1)  | 33(1) | 7(1)   | 5(1)  | 11(1)  |
| N(2)   | 26(1) | 19(1)  | 20(1) | 0(1)   | 9(1)  | 1(1)   |
| C(39)  | 34(1) | 22(1)  | 32(1) | 1(1)   | 18(1) | 4(1)   |
| C(40)  | 51(2) | 35(1)  | 41(2) | -12(1) | 26(1) | -1(1)  |
| C(41)  | 52(2) | 31(1)  | 31(1) | -10(1) | 13(1) | -10(1) |
| C(42)  | 35(1) | 18(1)  | 24(1) | -3(1)  | 6(1)  | -5(1)  |
| C(43)  | 30(1) | 35(1)  | 44(2) | -1(1)  | 21(1) | 6(1)   |
| C(44)  | 34(1) | 23(1)  | 32(1) | -5(1)  | -2(1) | -4(1)  |
| C(45)  | 16(1) | 17(1)  | 20(1) | 2(1)   | 6(1)  | 2(1)   |
| C(46)  | 15(1) | 22(1)  | 18(1) | 2(1)   | 2(1)  | 1(1)   |
| C(47)  | 24(1) | 29(1)  | 17(1) | 2(1)   | 2(1)  | -5(1)  |
| C(48)  | 20(1) | 27(1)  | 26(1) | 1(1)   | 0(1)  | 5(1)   |
| C(49)  | 16(1) | 24(1)  | 18(1) | 0(1)   | 6(1)  | 0(1)   |
| C(50)  | 24(1) | 29(1)  | 24(1) | -1(1)  | 1(1)  | -2(1)  |
| C(51)  | 26(1) | 36(1)  | 28(1) | -8(1)  | 0(1)  | -5(1)  |
| C(52)  | 26(1) | 25(1)  | 34(1) | -7(1)  | 6(1)  | -6(1)  |
| C(53)  | 23(1) | 25(1)  | 31(1) | 1(1)   | 8(1)  | 2(1)   |
| C(54)  | 16(1) | 26(1)  | 21(1) | 0(1)   | 3(1)  | 1(1)   |
| C(55)  | 48(2) | 52(2)  | 87(2) | 1(2)   | 16(2) | 3(2)   |
| C(56)  | 51(2) | 43(2)  | 71(2) | 9(2)   | 24(2) | 3(1)   |
| C(57)  | 65(2) | 67(2)  | 58(2) | 20(2)  | 33(2) | 14(2)  |
| C(58)  | 62(2) | 67(2)  | 44(2) | 12(2)  | 19(1) | 11(2)  |
| C(59)  | 49(2) | 35(2)  | 41(2) | -3(2)  | 3(2)  | 5(2)   |
| C(58X) | 62(2) | 67(2)  | 44(2) | 12(2)  | 19(1) | 11(2)  |
| C(59X) | 50(8) | 73(10) | 51(6) | -14(8) | 10(6) | -19(8) |

---

**Table 7.** Hydrogen coordinates ( $\times 10^4$ ) and isotropic displacement parameters ( $\approx 2 \times 10^3$ ) for *R*-1

|        | x     | y     | z    | U(eq) |
|--------|-------|-------|------|-------|
| H(3A)  | 6213  | 5102  | 775  | 25    |
| H(5A)  | 5004  | 6601  | 203  | 33    |
| H(5B)  | 5578  | 7321  | 827  | 33    |
| H(6A)  | 3784  | 8161  | 314  | 32    |
| H(6B)  | 3014  | 7079  | 299  | 32    |
| H(7A)  | 2683  | 8231  | 1182 | 31    |
| H(7B)  | 4108  | 8137  | 1502 | 31    |
| H(8A)  | 3178  | 6918  | 2075 | 29    |
| H(8B)  | 2303  | 6501  | 1417 | 29    |
| H(14A) | 775   | 4715  | 3499 | 26    |
| H(16A) | 2214  | 5735  | 4349 | 31    |
| H(16B) | 2988  | 4660  | 4487 | 31    |
| H(17A) | 3911  | 6693  | 4213 | 40    |
| H(17B) | 4317  | 6006  | 4875 | 40    |
| H(18A) | 5204  | 4727  | 4271 | 44    |
| H(18B) | 5821  | 5867  | 4224 | 44    |
| H(19A) | 5300  | 4887  | 3186 | 31    |
| H(19B) | 4891  | 6106  | 3161 | 31    |
| H(21A) | 1408  | 2070  | 1579 | 71    |
| H(21B) | 607   | 1811  | 866  | 71    |
| H(21C) | 26    | 2487  | 1392 | 71    |
| H(22A) | 3370  | 2974  | 968  | 54    |
| H(22B) | 3138  | 3964  | 470  | 54    |
| H(22C) | 2639  | 2811  | 226  | 54    |
| H(24A) | -1607 | 4683  | -18  | 100   |
| H(24B) | -1008 | 4813  | 749  | 100   |
| H(24C) | -1391 | 3660  | 452  | 100   |
| H(25A) | -474  | 3867  | -793 | 63    |
| H(25B) | -186  | 2825  | -344 | 63    |
| H(25C) | 911   | 3479  | -563 | 63    |
| H(26A) | 170   | 5664  | -303 | 81    |
| H(26B) | 1534  | 5229  | -65  | 81    |
| H(26C) | 806   | 5747  | 461  | 81    |
| H(29A) | 2658  | 254   | 4455 | 29    |
| H(30A) | 3616  | -1392 | 4664 | 31    |

|        |       |       |      |    |
|--------|-------|-------|------|----|
| H(31A) | 5364  | -1780 | 4231 | 31 |
| H(33A) | 3791  | 2426  | 3639 | 26 |
| H(34A) | 3218  | 2371  | 4692 | 41 |
| H(34B) | 1937  | 1840  | 4369 | 41 |
| H(34C) | 2240  | 3030  | 4176 | 41 |
| H(35A) | 2600  | 1547  | 2723 | 56 |
| H(35B) | 1862  | 2523  | 2960 | 56 |
| H(35C) | 1552  | 1334  | 3150 | 56 |
| H(36A) | 6871  | -44   | 3256 | 28 |
| H(37A) | 5562  | -1191 | 2543 | 51 |
| H(37B) | 5935  | -2154 | 3049 | 51 |
| H(37C) | 6936  | -1635 | 2676 | 51 |
| H(38A) | 7812  | -617  | 4327 | 47 |
| H(38B) | 8315  | -1287 | 3770 | 47 |
| H(38C) | 7326  | -1800 | 4155 | 47 |
| H(40A) | 7597  | -340  | 953  | 48 |
| H(41A) | 5261  | -388  | 646  | 45 |
| H(43A) | 9215  | 419   | 1943 | 52 |
| H(43B) | 8677  | 358   | 2615 | 52 |
| H(43C) | 8703  | 1470  | 2238 | 52 |
| H(44A) | 3438  | 255   | 1229 | 46 |
| H(44B) | 3817  | 1330  | 1631 | 46 |
| H(44C) | 3856  | 222   | 2018 | 46 |
| H(45A) | 7751  | 2827  | 2797 | 21 |
| H(47A) | 7762  | 2197  | 4742 | 35 |
| H(47B) | 7099  | 1384  | 4191 | 35 |
| H(47C) | 6506  | 2525  | 4269 | 35 |
| H(48A) | 9671  | 1972  | 4266 | 37 |
| H(48B) | 9651  | 2241  | 3502 | 37 |
| H(48C) | 8967  | 1203  | 3700 | 37 |
| H(50A) | 9446  | 3419  | 4857 | 31 |
| H(51A) | 9990  | 5152  | 5161 | 37 |
| H(52A) | 9202  | 6566  | 4475 | 33 |
| H(53A) | 7849  | 6220  | 3488 | 31 |
| H(54A) | 7312  | 4474  | 3178 | 26 |
| H(55A) | -1720 | 6781  | 1237 | 93 |
| H(55B) | -2101 | 7696  | 1702 | 93 |
| H(55C) | -1973 | 6494  | 1960 | 93 |
| H(56A) | 171   | 6560  | 1958 | 64 |
| H(56B) | 33    | 7770  | 1718 | 64 |

|        |      |      |      |    |
|--------|------|------|------|----|
| H(57A) | -414 | 7027 | 2958 | 73 |
| H(57B) | -588 | 8234 | 2717 | 73 |
| H(58A) | 1723 | 7163 | 2963 | 68 |
| H(58B) | 1283 | 7960 | 3477 | 68 |
| H(59A) | 2708 | 8804 | 2920 | 64 |
| H(59B) | 1418 | 9405 | 2754 | 64 |
| H(59C) | 1820 | 8613 | 2222 | 64 |
| H(58C) | 1787 | 7217 | 2929 | 68 |
| H(58D) | 1537 | 8477 | 2819 | 68 |
| H(59D) | 1933 | 8075 | 3944 | 87 |
| H(59E) | 811  | 7256 | 3828 | 87 |
| H(59F) | 562  | 8502 | 3719 | 87 |

---

—

**Table 6.** Torsion angles [°] for *R*-1

|                        |             |
|------------------------|-------------|
| N(1)-Mo(1)-O(1)-C(1)   | 164.59(17)  |
| C(45)-Mo(1)-O(1)-C(1)  | 56.09(18)   |
| N(2)-Mo(1)-O(1)-C(1)   | -74.65(19)  |
| C(21)-Si(1)-O(2)-C(12) | 35.7(2)     |
| C(22)-Si(1)-O(2)-C(12) | -84.7(2)    |
| C(23)-Si(1)-O(2)-C(12) | 158.49(19)  |
| Mo(1)-O(1)-C(1)-C(2)   | 24.7(3)     |
| Mo(1)-O(1)-C(1)-C(10)  | -159.88(14) |
| O(1)-C(1)-C(2)-C(3)    | 174.91(18)  |
| C(10)-C(1)-C(2)-C(3)   | -0.7(3)     |
| O(1)-C(1)-C(2)-Br(1)   | 1.2(2)      |
| C(10)-C(1)-C(2)-Br(1)  | -174.39(14) |
| C(1)-C(2)-C(3)-C(4)    | 0.3(3)      |
| Br(1)-C(2)-C(3)-C(4)   | 173.79(15)  |
| C(2)-C(3)-C(4)-C(9)    | 1.0(3)      |
| C(2)-C(3)-C(4)-C(5)    | -178.41(18) |
| C(3)-C(4)-C(5)-C(6)    | 159.81(19)  |
| C(9)-C(4)-C(5)-C(6)    | -19.6(3)    |
| C(4)-C(5)-C(6)-C(7)    | 51.1(2)     |
| C(5)-C(6)-C(7)-C(8)    | -64.7(2)    |
| C(6)-C(7)-C(8)-C(9)    | 43.7(2)     |
| C(3)-C(4)-C(9)-C(10)   | -1.9(3)     |
| C(5)-C(4)-C(9)-C(10)   | 177.48(19)  |
| C(3)-C(4)-C(9)-C(8)    | 180.00(19)  |
| C(5)-C(4)-C(9)-C(8)    | -0.6(3)     |
| C(7)-C(8)-C(9)-C(10)   | 170.47(18)  |
| C(7)-C(8)-C(9)-C(4)    | -11.4(3)    |
| O(1)-C(1)-C(10)-C(9)   | -175.90(17) |
| C(2)-C(1)-C(10)-C(9)   | -0.2(3)     |
| O(1)-C(1)-C(10)-C(11)  | 2.6(3)      |
| C(2)-C(1)-C(10)-C(11)  | 178.29(17)  |
| C(4)-C(9)-C(10)-C(1)   | 1.6(3)      |
| C(8)-C(9)-C(10)-C(1)   | 179.65(18)  |
| C(4)-C(9)-C(10)-C(11)  | -176.96(18) |
| C(8)-C(9)-C(10)-C(11)  | 1.1(3)      |
| C(1)-C(10)-C(11)-C(12) | -101.2(2)   |
| C(9)-C(10)-C(11)-C(12) | 77.3(2)     |
| C(1)-C(10)-C(11)-C(20) | 81.4(2)     |



|                         |             |
|-------------------------|-------------|
| C(9)-C(10)-C(11)-C(20)  | -100.0(2)   |
| Si(1)-O(2)-C(12)-C(13)  | -91.4(2)    |
| Si(1)-O(2)-C(12)-C(11)  | 95.1(2)     |
| C(20)-C(11)-C(12)-O(2)  | 171.76(17)  |
| C(10)-C(11)-C(12)-O(2)  | -5.6(3)     |
| C(20)-C(11)-C(12)-C(13) | -1.8(3)     |
| C(10)-C(11)-C(12)-C(13) | -179.19(18) |
| O(2)-C(12)-C(13)-C(14)  | -171.65(19) |
| C(11)-C(12)-C(13)-C(14) | 1.9(3)      |
| O(2)-C(12)-C(13)-Br(2)  | 7.2(3)      |
| C(11)-C(12)-C(13)-Br(2) | -179.17(14) |
| C(12)-C(13)-C(14)-C(15) | -0.2(3)     |
| Br(2)-C(13)-C(14)-C(15) | -179.06(15) |
| C(13)-C(14)-C(15)-C(20) | -1.7(3)     |
| C(13)-C(14)-C(15)-C(16) | 176.83(19)  |
| C(14)-C(15)-C(16)-C(17) | -159.7(2)   |
| C(20)-C(15)-C(16)-C(17) | 18.7(3)     |
| C(15)-C(16)-C(17)-C(18) | -48.4(3)    |
| C(16)-C(17)-C(18)-C(19) | 61.5(3)     |
| C(17)-C(18)-C(19)-C(20) | -42.3(3)    |
| C(14)-C(15)-C(20)-C(11) | 1.7(3)      |
| C(16)-C(15)-C(20)-C(11) | -176.72(18) |
| C(14)-C(15)-C(20)-C(19) | 178.44(19)  |
| C(16)-C(15)-C(20)-C(19) | 0.0(3)      |
| C(12)-C(11)-C(20)-C(15) | 0.0(3)      |
| C(10)-C(11)-C(20)-C(15) | 177.32(18)  |
| C(12)-C(11)-C(20)-C(19) | -176.77(18) |
| C(10)-C(11)-C(20)-C(19) | 0.5(3)      |
| C(18)-C(19)-C(20)-C(15) | 11.6(3)     |
| C(18)-C(19)-C(20)-C(11) | -171.6(2)   |
| O(2)-Si(1)-C(23)-C(25)  | 169.83(16)  |
| C(21)-Si(1)-C(23)-C(25) | -70.3(2)    |
| C(22)-Si(1)-C(23)-C(25) | 52.0(2)     |
| O(2)-Si(1)-C(23)-C(24)  | -68.7(2)    |
| C(21)-Si(1)-C(23)-C(24) | 51.2(3)     |
| C(22)-Si(1)-C(23)-C(24) | 173.5(2)    |
| O(2)-Si(1)-C(23)-C(26)  | 50.91(19)   |
| C(21)-Si(1)-C(23)-C(26) | 170.77(18)  |
| C(22)-Si(1)-C(23)-C(26) | -66.9(2)    |
| C(45)-Mo(1)-N(1)-C(27)  | -106.8(8)   |

|                         |             |
|-------------------------|-------------|
| O(1)-Mo(1)-N(1)-C(27)   | 138.2(8)    |
| N(2)-Mo(1)-N(1)-C(27)   | 3.2(8)      |
| Mo(1)-N(1)-C(27)-C(32)  | 32.3(9)     |
| Mo(1)-N(1)-C(27)-C(28)  | -147.0(7)   |
| N(1)-C(27)-C(28)-C(29)  | 176.47(18)  |
| C(32)-C(27)-C(28)-C(29) | -2.8(3)     |
| N(1)-C(27)-C(28)-C(33)  | -0.5(3)     |
| C(32)-C(27)-C(28)-C(33) | -179.83(18) |
| C(27)-C(28)-C(29)-C(30) | 1.3(3)      |
| C(33)-C(28)-C(29)-C(30) | 178.26(19)  |
| C(28)-C(29)-C(30)-C(31) | 0.7(3)      |
| C(29)-C(30)-C(31)-C(32) | -1.2(3)     |
| C(30)-C(31)-C(32)-C(27) | -0.2(3)     |
| C(30)-C(31)-C(32)-C(36) | -178.6(2)   |
| N(1)-C(27)-C(32)-C(31)  | -177.00(18) |
| C(28)-C(27)-C(32)-C(31) | 2.3(3)      |
| N(1)-C(27)-C(32)-C(36)  | 1.3(3)      |
| C(28)-C(27)-C(32)-C(36) | -179.37(18) |
| C(29)-C(28)-C(33)-C(34) | 34.2(3)     |
| C(27)-C(28)-C(33)-C(34) | -148.89(19) |
| C(29)-C(28)-C(33)-C(35) | -90.8(2)    |
| C(27)-C(28)-C(33)-C(35) | 86.1(2)     |
| C(31)-C(32)-C(36)-C(37) | 74.8(2)     |
| C(27)-C(32)-C(36)-C(37) | -103.5(2)   |
| C(31)-C(32)-C(36)-C(38) | -49.5(3)    |
| C(27)-C(32)-C(36)-C(38) | 132.2(2)    |
| N(1)-Mo(1)-N(2)-C(39)   | -125.3(2)   |
| C(45)-Mo(1)-N(2)-C(39)  | -21.3(2)    |
| O(1)-Mo(1)-N(2)-C(39)   | 110.32(19)  |
| N(1)-Mo(1)-N(2)-C(42)   | 83.91(14)   |
| C(45)-Mo(1)-N(2)-C(42)  | -172.11(14) |
| O(1)-Mo(1)-N(2)-C(42)   | -40.49(16)  |
| C(42)-N(2)-C(39)-C(40)  | 0.4(2)      |
| Mo(1)-N(2)-C(39)-C(40)  | -151.75(18) |
| C(42)-N(2)-C(39)-C(43)  | -177.7(2)   |
| Mo(1)-N(2)-C(39)-C(43)  | 30.1(3)     |
| N(2)-C(39)-C(40)-C(41)  | 0.4(3)      |
| C(43)-C(39)-C(40)-C(41) | 178.4(2)    |
| C(39)-C(40)-C(41)-C(42) | -1.2(3)     |
| C(40)-C(41)-C(42)-N(2)  | 1.5(3)      |

|                           |             |
|---------------------------|-------------|
| C(40)-C(41)-C(42)-C(44)   | -178.1(2)   |
| C(39)-N(2)-C(42)-C(41)    | -1.2(2)     |
| Mo(1)-N(2)-C(42)-C(41)    | 157.41(16)  |
| C(39)-N(2)-C(42)-C(44)    | 178.4(2)    |
| Mo(1)-N(2)-C(42)-C(44)    | -23.0(2)    |
| N(1)-Mo(1)-C(45)-C(46)    | -7.9(2)     |
| O(1)-Mo(1)-C(45)-C(46)    | 107.0(2)    |
| N(2)-Mo(1)-C(45)-C(46)    | -112.8(2)   |
| Mo(1)-C(45)-C(46)-C(47)   | -2.2(3)     |
| Mo(1)-C(45)-C(46)-C(49)   | -124.6(2)   |
| Mo(1)-C(45)-C(46)-C(48)   | 116.3(2)    |
| C(47)-C(46)-C(49)-C(54)   | -114.0(2)   |
| C(45)-C(46)-C(49)-C(54)   | 9.6(3)      |
| C(48)-C(46)-C(49)-C(54)   | 126.6(2)    |
| C(47)-C(46)-C(49)-C(50)   | 65.1(2)     |
| C(45)-C(46)-C(49)-C(50)   | -171.33(17) |
| C(48)-C(46)-C(49)-C(50)   | -54.3(2)    |
| C(54)-C(49)-C(50)-C(51)   | -0.9(3)     |
| C(46)-C(49)-C(50)-C(51)   | 180.0(2)    |
| C(49)-C(50)-C(51)-C(52)   | 0.4(3)      |
| C(50)-C(51)-C(52)-C(53)   | 0.4(3)      |
| C(51)-C(52)-C(53)-C(54)   | -0.6(3)     |
| C(50)-C(49)-C(54)-C(53)   | 0.6(3)      |
| C(46)-C(49)-C(54)-C(53)   | 179.76(19)  |
| C(52)-C(53)-C(54)-C(49)   | 0.1(3)      |
| C(55)-C(56)-C(57)-C(58)   | -178.5(3)   |
| C(55)-C(56)-C(57)-C(58X)  | -178.5(3)   |
| C(56)-C(57)-C(58)-C(59)   | 64.7(5)     |
| C(58X)-C(57)-C(58)-C(59)  | 58(66)      |
| C(56)-C(57)-C(58X)-C(59X) | -169.2(2)   |
| C(58)-C(57)-C(58X)-C(59X) | 4(65)       |

---

Symmetry transformations used to generate equivalent atoms:
